# Supplementary material for: Photocatalysis and Kinetic Resolution by Lithiation to Give Enantioenriched 2-Arylpiperazines
Source: PubMed Central journal article supplement (PMC9942196; doi:10.1021/acs.orglett.3c00074), 2023-02-03
Supplement: ol3c00074_si_001.pdf [file ol3c00074_si_001.pdf]

# Photocatalysis and Kinetic Resolution by Lithiation to give Enantioenriched 2-Arylpiperazines

Anjan Das, Anthony Choi, Iain Coldham\*

*Department of Chemistry, University of Sheffield, Brook Hill, Sheffield, S3 7HF, UK*

## Contents

|                                                 |       |
|-------------------------------------------------|-------|
| 1. General procedures                           | S-2   |
| 2. Experimental procedures and data             | S-3   |
| 2.1 Preparation of starting material            | S-3   |
| 2.2 General procedure for the arylation         | S-5   |
| 2.3 Preparation of substrates by photocatalysis | S-6   |
| 2.4 Racemic lithiation–trapping                 | S-12  |
| 2.5 Kinetic resolution                          | S-16  |
| 2.6 Further functionalization                   | S-19  |
| 2.7 Synthesis of GSK-3 $\beta$ inhibitor        | S-23  |
| 3. VT-NMR spectra                               | S-24  |
| 4. NMR spectra                                  | S-26  |
| 5. HPLC traces                                  | S-54  |
| 6. DFT calculations                             | S-67  |
| 7. References                                   | S-120 |

## 1. General procedures

All the reagents were obtained from commercial suppliers and were used without further purification or after distillation; n-BuLi was titrated before use. Dry solvents were obtained from a Grubbs dry solvent system or obtained from commercial suppliers. Thin layer chromatography was performed on Merck silica gel 60F254 plates and visualised by UV irradiation at 254 nm or by staining with an alkaline KMnO<sub>4</sub> dip. Column chromatography was performed using DAVISIL or Geduran silica gel (40-63 micron mesh). Heating was performed using aluminum heating blocks on a hotplate stirrer. InfraRed spectra were recorded on a Perkin Elmer Spectrum RX Fourier Transform – IR System and only selected peaks are reported. <sup>1</sup>H NMR spectra were recorded on a Bruker AC400 (400 MHz) instrument. Chemical shifts are reported in ppm with respect to the residual solvent peaks, with multiplicities given as s = singlet, d = doublet, t = triplet, q = quartet, m = multiplet, br = broad. Coupling constants (J values) are quoted to the nearest 0.5 Hz with values in Hertz (Hz). <sup>13</sup>C NMR spectra were recorded on the above instrument at 100 MHz. Low and high resolution (accurate mass) mass spectra were recorded on an Agilent Technologies LC-MS quadrupole time-of-flight (Q-TOF) instrument for ElectroSpray (ES).

Light source: Kessil A160WE Tuna Blue, 34 W, blue LED, 460 nm wavelength. The light was placed 6 cm away from the reaction vessel (standard glass, round bottom flask) and no filter was used.

## 2. Experimental procedures and data

### 2.1 Preparation of starting material

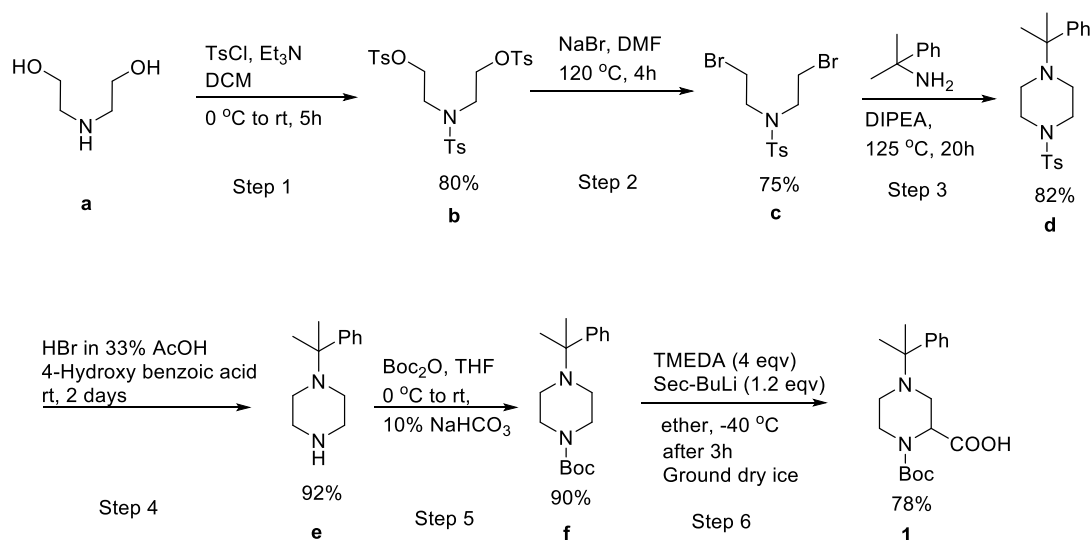

#### Preparation of **b**:

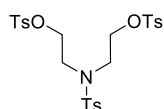

Triethylamine (45 mL, 0.44 mol) was added to diethanolamine **a** (13.75 g, 0.13 mol) in CH<sub>2</sub>Cl<sub>2</sub> (250 mL). The mixture was cooled to 0 °C and p-toluenesulfonyl chloride (78.5 g, 0.41 mol) was added portion wise with vigorous stirring over 2 h. The mixture was allowed to warm to room temperature over 16 h. The mixture was filtered and the filtrate was washed with aqueous HCl (1 M) (3 x 100 mL), water (5 x 200 mL), and saturated NaHCO<sub>3</sub> solution (5 x 200 mL). The organic layer was dried (MgSO<sub>4</sub>) and the solvent was evaporated to give the product **b** (60 g, 80%) as an amorphous white solid; m.p. 98 °C, lit.<sup>1</sup> m.p. 97.5 °C; <sup>1</sup>H NMR (400 MHz, CDCl<sub>3</sub>) δ 7.81–7.77 (m, 4H), 7.64–7.62 (m, 2H), 7.44–7.30 (m, 6H), 4.13 (t, 4H, *J* = 8 Hz), 3.39 (t, 4H, *J* = 8 Hz), 2.48 (s, 6H), 2.45 (s, 3H). Data as reported.<sup>1</sup>

#### Preparation of **c**:

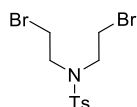

Tosylate **b** (43 g, 0.076 mol) and NaBr (40 g, 0.39 mol) in DMF (250 mL) were heated at 120 °C. After 4 h, the mixture was cooled to room temperature and concentrated to 50 mL under reduced pressure. The mixture was poured into a rapidly stirred ice–water mixture (1 L). The product was filtered and was washed with water (200 mL), hexane (200 mL), and then was air-dried to give product **c** (23.5 g, 75%) as an amorphous white solid; m.p. 56–58 °C, lit.<sup>1</sup> m.p. 58.2 °C; <sup>1</sup>H NMR (400 MHz, CDCl<sub>3</sub>) δ 7.66 (d, 2H, *J* = 8 Hz), 7.37 (d, 2H, *J* = 8 Hz), 3.76 (t, 4H, *J* = 4 Hz), 3.00 (t, 4H, *J* = 4 Hz), 2.47 (s, 3H). Data as reported.<sup>1</sup>

*Preparation of d:*

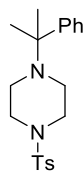

Dibromide **c** (9.2 g, 0.023 mol), cumylamine (3 g, 0.022 mol) and N,N-diisopropylethylamine (9 mL, 0.05 mol) were heated at 125 °C under nitrogen for 20 h. The mixture was allowed to cool to room temperature and EtOAc (100 mL) was added. The mixture was washed with water (2 x 200 mL). The organic layer was dried (MgSO<sub>4</sub>), evaporated and purified by column chromatography, eluting with hexane:EtOAc 9:1) to give the product **d** (7 g, 82%) as a yellow oil; <sup>1</sup>H NMR (400 MHz, CDCl<sub>3</sub>) δ 7.66 (d, 2H, *J* = 8 Hz), 7.43 (d, 2H, *J* = 8 Hz), 7.36 (d, 2H, *J* = 8 Hz), 7.30–7.26 (m, 2H), 7.22–7.18 (m, 1H), 2.98 (br, 4H), 2.59–2.56 (m, 4H), 2.48 (s, 3H), 1.33 (s, 6H). Data as reported.<sup>2</sup>

*Preparation of e:*

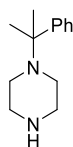

Hydrogen bromide solution (155 mL, 33 wt % in acetic acid) was added to N-Ts-piperazine **d** (13.5 g, 0.037 mol) and 4-hydroxybenzoic acid (13.5 g, 0.097 mol) and the mixture was stirred under nitrogen at room temperature. After 2 d, water (150 mL) was added slowly and the mixture was stirred for 2 h. The precipitate was filtered and was washed with water (2 x 100 mL). The solution was cooled to 0 °C and KOH pellets were added portion wise until pH > 10, and the mixture was extracted with EtOAc (3 x 150 mL). The combined organic layers were washed with brine (200 mL), dried (MgSO<sub>4</sub>), and evaporated to give the product **e** (6.9 g, 90%) as a colourless oil; <sup>1</sup>H NMR (400 MHz, CDCl<sub>3</sub>) δ 7.56 (d, 2H, *J* = 4 Hz), 7.34–7.30 (m, 2H), 7.24–7.20 (m, 1H), 2.87 (t, 4H, *J* = 4 Hz), 2.47 (t, 4H, *J* = 4 Hz), 1.91 (s, 1H), 1.36 (s, 6H). Data as reported.<sup>2</sup>

*Preparation of f:*

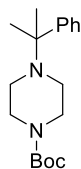

Compound **e** (9.1 g, 30 mmol) in THF (50 mL) was dropwise added to di-tert-butyl dicarbonate (9.5 g, 43.5 mmol) in THF (200 mL) at 0 °C. After 10 min the mixture was warmed to room temperature. After 2 h, 10% NaHCO<sub>3</sub>(aq) solution (150 mL) was added and the mixture was extracted with EtOAc (2 x 250 mL). The combined organic extracts were washed with brine (200 mL), dried (MgSO<sub>4</sub>), and evaporated. Purification by column chromatography on silica gel, eluting with EtOAc–hexane (1:9), gave the product **f** (12.2 g, 90%) as a yellow oil; <sup>1</sup>H NMR (400 MHz, CDCl<sub>3</sub>) δ 7.55 (d, 2H, *J* = 8 Hz), 7.34–7.31 (m, 2H), 7.25–7.21 (m, 1H), 3.40 (t, 4H, *J* = 4 Hz),

2.44 (t, 4H,  $J = 4$ Hz), 1.47 (s, 9H), 1.36 (s, 6H);  $^{13}\text{C}$  NMR (100 MHz,  $\text{CDCl}_3$ )  $\delta$  154.8, 148.8, 128.0, 126.2, 126.0, 79.3, 59.7, 46.0 (2 x  $\text{CH}_2$ ), 28.4, 24.1. Data as reported.<sup>3</sup>

### Preparation of **1**:

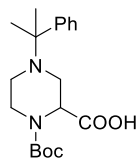

*sec*-BuLi (16.5 mL, 19.8 mmol, 1.2 M in cyclohexane) was added to piperazine **f** (5 g, 16.5 mmol) and TMEDA (10.0 mL, 65.8 mmol) in  $\text{Et}_2\text{O}$  (75 mL) at  $-40$  °C under nitrogen. After 3 h, dry ice (100 g), which had been ground under a continuous flow of nitrogen and rinsed with dry THF,<sup>4</sup> was added. The mixture was allowed to warm to room temperature and the solvent was evaporated. Water (200 mL) was added and aqueous HCl (2 M) was added at 0 °C to maintain pH 2. The mixture was extracted with EtOAc (3 x 150 mL) and the combined organic layers were dried ( $\text{MgSO}_4$ ) and the solvent was evaporated to give the acid **1** (4.4 g, 78%) as an amorphous white solid; m.p. 98–99 °C; FT-IR  $\nu_{\text{max}}$  (ATR)/ $\text{cm}^{-1}$  2974, 2934, 2820, 1701, 1597, 1450, 1388, 1366, 1170, 1116, 966, 764, 770;  $^1\text{H}$  NMR (400 MHz,  $\text{CDCl}_3$ ) (~55:45 mixture of rotamers)  $\delta$  7.71 (br s, 1H), 7.50 (d, 2H,  $J = 8$  Hz), 7.36–7.32 (m, 2H), 7.26–7.22 (m, 1H) 4.79 (br s, 0.45H), 4.63 (br s, 0.55H), 3.90 (br d, 0.55H,  $J = 12$  Hz), 3.78 (br d, 0.45H,  $J = 12$  Hz), 3.52 (br d, 1H,  $J = 12$  Hz), 3.38 (td, 1H,  $J = 12$  Hz, 4 Hz), 2.95 (br d, 0.55H,  $J = 12$  Hz) 2.80 (br d, 0.45H,  $J = 12$  Hz), 2.50–2.45 (m, 1H), 2.32–2.23 (m, 1H), 1.51 (s, 3H), 1.48–1.46 (m, 12H) ;  $^{13}\text{C}$  NMR (100 MHz,  $\text{CDCl}_3$ , rotamers)  $\delta$  175.3, 174.8, 155.7, 155.4, 128.4, 128.2, 127.4, 126.9, 126.6, 126.3, 80.4, 80.3, 61.9, 60.9, 55.4, 54.5, 47.7, 46.0, 42.1, 40.6, 28.4, 28.3, 25.0, 24.7, 22.8, 22.6; HRMS (ESI-TOF)  $m/z$ :  $[\text{M}+\text{H}]^+$  Calcd for  $\text{C}_{19}\text{H}_{29}\text{N}_2\text{O}_4$  349.2127. Found 349.2148.

## 2.2 General procedure for the arylation

**(A) Direct C–H activation:**<sup>5</sup> In a 10 mL dry Schlenk tube with a magnetic stirring bar were added the aryl bromide (0.5 mmol), *N*-Boc-*N'*-cumylpiperazine **f** (1.0 mmol), and  $\text{Ir}[\text{dF}(\text{CF}_3)\text{ppy}]_2(\text{dtbbpy})\text{PF}_6$  (5.6 mg, 5.0  $\mu\text{mol}$ , 1.0 mol%). Anhydrous DMSO (1.0 mL) and 3-acetoxyquinuclidine (85  $\mu\text{L}$ , 0.55 mmol) were added. A solution (1 mL) taken from a 0.5 M stock solution in anhydrous DMSO of 4,7-dimethoxy-1,10-phenanthroline (1.2 mg, 5.0  $\mu\text{mol}$ , 1.0 mol%) and nickel(II) bromide trihydrate (1.4 mg, 5.0  $\mu\text{mol}$ , 1.0 mol%) was added. After 10 min, water (360  $\mu\text{L}$ , 20 mmol) was added. The mixture was degassed via two cycles of freeze-pump-thaw using liquid nitrogen. The Schlenk tube was placed ~6 cm away from a 34 W blue LED and stirred, with cooling by a fan. After 20 h, aq.  $\text{NaHCO}_3$  (30 mL) was added, and the aqueous layer was extracted with EtOAc (3 x 50 mL). The combined organic layers were dried ( $\text{MgSO}_4$ ) and evaporated. Purification by column chromatography, as described below, gave the product.

**(B) Decarboxylative arylation:**<sup>6</sup> In an oven-dried 40 mL Schlenk tube with a magnetic stir bar were added Ir[dF(CF<sub>3</sub>)ppy]<sub>2</sub>(dtbbpy)PF<sub>6</sub> (4.0 μmol, 0.01 equiv), NiCl<sub>2</sub>·glyme (0.04 mmol, 0.1 equiv), 4,4'-di-tert-butyl-2,2'-bipyridyl (0.06 mmol, 0.15 equiv), the aryl halide (1.0 mmol, 2.5 equiv), the carboxylic acid **1** (0.60 mmol, 1.5 equiv), Cs<sub>2</sub>CO<sub>3</sub> (0.60 mmol, 1.5 equiv), and DMF (20 mL). The mixture was degassed by freeze-pump-thaw using liquid nitrogen. The Schlenk tube was placed ~6 cm away from a 34 W blue LED and stirred, with cooling by a fan. After 24 h, saturated aqueous NaHCO<sub>3</sub> solution (30 mL) was added, and the aqueous layer was extracted with EtOAc (3 × 100 mL). The combined organic layers were washed with water and brine, dried (MgSO<sub>4</sub>) and evaporated. Purification by column chromatography, as described below, gave the product.

### 2.3 Preparation of substrates by photocatalysis

1-(tert-Butoxycarbonyl)-2-(4-methoxycarbonylphenyl)-4-(2-phenylpropan-2-yl)piperazine (**A**)

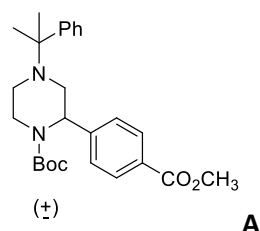

Using general procedure A, *N*-Boc-*N'*-cumylpiperazine (**f**) (see page S-4) (305 mg, 1 mmol) and methyl 4-bromobenzoate (108 mg, 0.5 mmol) gave, after purification by column chromatography on silica gel, eluting with hexane–EtOAc (9:1), the piperazine **A** (153 mg, 35%) as a colourless oil; *R*<sub>f</sub> = 0.65 [hexane–EtOAc (4:1)]; FT-IR *v*<sub>max</sub> (ATR)/cm<sup>-1</sup> 2972, 2816, 2249, 1721, 1690, 1611, 1277, 1110, 1012, 858; <sup>1</sup>H NMR (400 MHz, CDCl<sub>3</sub>) δ 8.01 (d, 2H, *J* = 8 Hz), 7.33–7.30 (m, 4H), 7.23–7.19 (m, 3H), 5.19 (br s, 1H), 3.96–3.93 (m, 4H) 3.24 (d, 1H, *J* = 12 Hz), 3.10 (td, 1H, *J* = 12 Hz, 4 Hz), 2.76 (d, 1H, *J* = 12 Hz), 2.65 (dd, 1H, *J* = 12 Hz, 4 Hz), 2.32 (td, 1H, *J* = 12 Hz, 4 Hz), 1.44 (s, 9H), 1.35 (s, 3H), 1.33 (s, 3H); <sup>13</sup>C NMR (100 MHz, CDCl<sub>3</sub>) δ 167.1, 155.1, 148.1, 146.5, 129.4, 128.3, 127.9, 127.1, 126.4, 126.1, 80.0, 59.7, 54.4, 52.0, 49.4, 46.2, 41.3, 28.3, 23.8, 23.4; HRMS (ESI-TOF) *m/z*: [M+H]<sup>+</sup> Calcd for C<sub>26</sub>H<sub>35</sub>N<sub>2</sub>O<sub>4</sub> 439.2597. Found 439.2612.

1-(tert-Butoxycarbonyl)-2-(4-acetylphenyl)-4-(2-phenylpropan-2-yl)piperazine (**2a**)

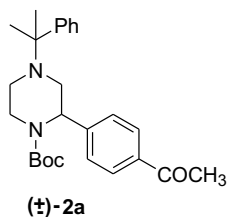

Using general procedure B, carboxylic acid **1** (209 mg, 0.6 mmol), Ir[dF(CF<sub>3</sub>)ppy]<sub>2</sub>(dtbbpy)PF<sub>6</sub> (4.5 mg, 4 μmol), 4'-bromoacetophenone (199 mg, 1.0 mmol),

nickel(II) chloride-glyme (9 mg, 0.04 mmol), 4,4'-di-tert-butyl-2,2'-dipyridyl (16.1 mg, 0.06 mmol), cesium carbonate (196.5 mg, 0.6 mmol) and DMF (20 mL) gave, after purification by column chromatography on silica gel, eluting with hexane–EtOAc (9:1), the piperazine **2a** (203 mg, 80%) as a colourless oil;  $R_f = 0.70$  [hexane–EtOAc (4:1)]; FT-IR  $\nu_{\max}$  (ATR)/ $\text{cm}^{-1}$  2975, 2928, 2817, 1681, 1608, 1413, 1363, 1270, 1170, 770;  $^1\text{H}$  NMR (400 MHz,  $\text{CDCl}_3$ )  $\delta$  7.93 (d, 2H,  $J = 8$  Hz), 7.36–7.34 (m, 2H), 7.29–7.22 (m, 2H), 7.21–7.20 (m, 3H), 5.19 (br s, 1H), 3.96 (br d, 1H,  $J = 12$  Hz), 3.25 (br d, 1H,  $J = 12$  Hz), 3.08 (td, 1H,  $J = 12$  Hz, 4 Hz), 2.76 (br d, 1H, 12 Hz), 2.67–2.65 (m, 4H), 2.32 (td, 1H,  $J = 12$  Hz, 4 Hz), 1.44 (s, 9H), 1.36 (s, 3H), 1.33 (s, 3H);  $^{13}\text{C}$  NMR (100 MHz,  $\text{CDCl}_3$ )  $\delta$  197.9, 155.1, 148.1, 146.8, 135.5, 128.2, 127.9, 127.3, 126.4, 126.2, 80.0, 59.9, 54.4, 49.4, 46.2, 41.3, 28.3, 26.6, 23.8, 23.4; HRMS (ESI-TOF)  $m/z$ :  $[\text{M}+\text{H}]^+$  Calcd for  $\text{C}_{26}\text{H}_{35}\text{N}_2\text{O}_3$  423.2648. Found 423.2652.

*1-(tert-Butoxycarbonyl)-4-(2-phenylpropan-2-yl)-2-(4-tert-butoxycarbonylphenyl)piperazine*  
**(2b)**

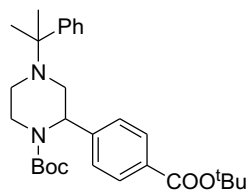

**(±)-2b**

Using general procedure B, carboxylic acid **1** (209 mg, 0.6 mmol),  $\text{Ir}[\text{dF}(\text{CF}_3)\text{ppy}]_2(\text{dtbbpy})\text{PF}_6$  (4.5 mg, 4  $\mu\text{mol}$ ), tert-butyl 4-bromobenzoate (258 mg, 1.0 mmol), nickel(II) chloride-glyme (9 mg, 0.04 mmol), 4,4'-di-tert-butyl-2,2'-dipyridyl (16.1 mg, 0.06 mmol), cesium carbonate (196.5 mg, 0.6 mmol) and DMF (20 mL) gave, after purification by column chromatography on silica gel, eluting with hexane–EtOAc (9:1), the piperazine **2b** (158 mg, 55%) as a yellow oil;  $R_f = 0.74$  [hexane–EtOAc (4:1)]; FT-IR  $\nu_{\max}$  (ATR)/ $\text{cm}^{-1}$  2975, 2930, 1697, 1611, 1455, 1415, 1392, 1366, 1299, 1167, 1114, 764, 701;  $^1\text{H}$  NMR (400 MHz,  $\text{CDCl}_3$ )  $\delta$  7.96 (d, 2H,  $J = 8$  Hz), 7.33–7.29 (m, 4H), 7.26–7.20 (m, 3H), 5.19 (br s, 1H), 3.94 (br d, 1H,  $J = 12$  Hz), 3.28 (br d, 1H,  $J = 12$  Hz), 3.07 (td, 1H,  $J = 12$  Hz, 4 Hz), 2.74 (br d, 1H,  $J = 12$  Hz), 2.66 (dd, 1H,  $J = 12$  Hz, 4 Hz), 2.31 (td, 1H,  $J = 12$  Hz, 4 Hz), 1.64 (s, 9H), 1.45 (s, 9H), 1.36 (s, 3H), 1.34 (s, 3H);  $^{13}\text{C}$  NMR (100 MHz,  $\text{CDCl}_3$ )  $\delta$  165.8, 155.1, 148.1, 145.9, 130.2, 129.2, 128.0, 126.9, 126.4, 126.2, 80.8, 79.9, 59.7, 54.3, 49.3, 46.3, 41.1, 28.3, 28.2, 23.9, 23.3; HRMS (ESI-TOF)  $m/z$ :  $[\text{M}+\text{H}]^+$  Calcd for  $\text{C}_{29}\text{H}_{41}\text{N}_2\text{O}_4$  481.3066. Found 481.3070. The enantiomers were resolved using HPLC (Cellulose–2, n-hexane–isopropanol = 99:1, flow rate = 0.5 mL/min,  $\lambda = 254$  nm),  $t_R = 16.7$  min and 19.3 min.

1-(*tert*-Butoxycarbonyl)-2-(4-fluorophenyl)-4-(2-phenylpropan-2-yl)piperazine (**2c**)

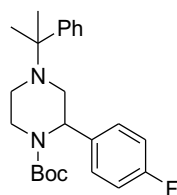

(±)-**2c**

Using general procedure B, carboxylic acid **1** (209 mg, 0.6 mmol), Ir[dF(CF<sub>3</sub>)ppy]<sub>2</sub>(dtbbpy)PF<sub>6</sub> (4.5 mg, 4 μmol), 1-fluoro-4-iodobenzene (0.12 mL, 1.0 mmol), nickel(II) chloride·glyme (9 mg, 0.04 mmol), 4,4'-di-*tert*-butyl-2,2'-dipyridyl (16.1 mg, 0.06 mmol), cesium carbonate (196.5 mg, 0.6 mmol) and DMF (20 mL) gave, after purification by column chromatography on silica gel, eluting with hexane–EtOAc (9:1), the piperazine **2c** (131 mg, 55%) as a colourless oil; *R*<sub>f</sub> = 0.84 [hexane–EtOAc (4:1)]; FT-IR *v*<sub>max</sub> (ATR)/cm<sup>-1</sup> 2974, 2930, 2816, 1690, 1602, 1508, 1415, 1364, 1158, 1013, 701; <sup>1</sup>H NMR (400 MHz, CDCl<sub>3</sub>) δ 7.37–7.35 (m, 2H), 7.33–7.20 (m, 5H), 7.04–7.00 (m, 2H), 5.16 (br s, 1H), 3.92 (br d, 1H, *J* = 12 Hz), 3.22 (br d, 1H, *J* = 12 Hz), 3.08 (td, 1H, *J* = 12 Hz, 4 Hz), 2.76 (br d, 1H, *J* = 12 Hz), 2.64 (dd, 1H, *J* = 12 Hz, 4 Hz), 2.32 (td, 1H, *J* = 12 Hz, 4 Hz), 1.47 (s, 9H), 1.38 (s, 3H), 1.37 (s, 3H); <sup>13</sup>C NMR (100 MHz, CDCl<sub>3</sub>) δ 161.6 (d, *J* = 243 Hz), 155.0, 148.2, 136.7, 128.8 (d, *J* = 16 Hz), 127.9, 126.4, 126.2, 114.7 (d, *J* = 21 Hz), 79.8, 59.8, 53.6, 49.4, 46.4, 40.9, 28.4, 23.7, 23.4; <sup>19</sup>F NMR (377 MHz, CDCl<sub>3</sub>) δ –116.87; HRMS (ESI-TOF) *m/z*: [M+H]<sup>+</sup> Calcd for C<sub>24</sub>H<sub>32</sub>FN<sub>2</sub>O<sub>2</sub> 399.2448. Found 399.2447. The enantiomers were resolved using HPLC (Amylose–2, *n*-hexane–isopropanol = 95:5, flow rate = 0.5 mL/min, *l* = 254 nm), *t*<sub>R</sub> = 11.4 min and 14.3 min.

1-(*tert*-Butoxycarbonyl)-4-(2-phenylpropan-2-yl)-2-(4-trifluoromethylphenyl)piperazine (**2d**)

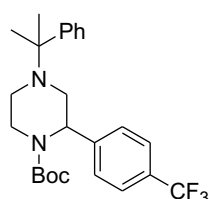

(±)-**2d**

Using general procedure B, carboxylic acid **1** (209 mg, 0.6 mmol), Ir[dF(CF<sub>3</sub>)ppy]<sub>2</sub>(dtbbpy)PF<sub>6</sub> (4.5 mg, 4 μmol), 4-bromobenzotrifluoride (0.14 mL, 1.0 mmol), nickel(II) chloride·glyme (9 mg, 0.04 mmol), 4,4'-di-*tert*-butyl-2,2'-dipyridyl (16.1 mg, 0.06 mmol), cesium carbonate (196.5 mg, 0.6 mmol) and DMF (20 mL) gave, after purification by column chromatography on silica gel, eluting with hexane–EtOAc (9:1), the piperazine **2d** (91 mg, 34%) as a colourless oil; *R*<sub>f</sub> = 0.80 [hexane–EtOAc (4:1)]; FT-IR *v*<sub>max</sub> (ATR)/cm<sup>-1</sup> 2975, 2931, 2814, 1693, 1620, 1322, 1265, 1118, 1068, 759; <sup>1</sup>H NMR (400 MHz, CDCl<sub>3</sub>) δ 7.59 (d, 2H, *J* = 8 Hz), 7.37 (d, 2H, *J* = 8 Hz), 7.31–7.29 (m, 2H), 7.24–7.22 (m, 3H), 5.20 (br s, 1H), 3.98 (br d, 1H, *J* = 12 Hz), 3.20 (br d, 1H, *J* = 12 Hz), 3.12 (td, 1H, *J* = 12 Hz, 4 Hz), 2.82 (br d, 1H, *J* = 12 Hz), 2.67 (dd, 1H, *J* = 12 Hz, 4 Hz), 2.34 (td, 1H, *J* = 12 Hz, 4 Hz), 1.46 (s, 9H), 1.38 (s, 3H), 1.35 (s,



3H);  $^{13}\text{C}$  NMR (100 MHz,  $\text{CDCl}_3$ )  $\delta$  155.1, 148.0, 145.2, 128.7 (q,  $J = 32$  Hz), 127.9, 127.4, 126.4, 126.2, 124.9 (q,  $J = 40$  Hz), 124.3 (q,  $J = 270$  Hz), 80.0, 59.8, 54.1, 49.5, 46.2, 41.3, 28.3, 24.3, 22.8;  $^{19}\text{F}$  NMR (377 MHz,  $\text{CDCl}_3$ )  $\delta$  -62.3; HRMS (ESI-TOF)  $m/z$ :  $[\text{M}+\text{H}]^+$  Calcd for  $\text{C}_{25}\text{H}_{32}\text{F}_3\text{N}_2\text{O}_2$  449.2416. Found 449.2413.

*1-(tert-Butoxycarbonyl)-2-(4-cyanophenyl)-4-(2-phenylpropan-2-yl)piperazine (2e)*

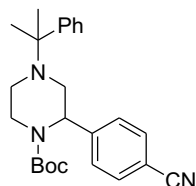

(±)-**2e**

Using general procedure B, carboxylic acid **1** (209 mg, 0.6 mmol),  $\text{Ir}[\text{dF}(\text{CF}_3)\text{ppy}]_2(\text{dtbbpy})\text{PF}_6$  (4.5 mg, 4  $\mu\text{mol}$ ), 4-bromobenzonitrile (182 mg, 1.0 mmol), nickel(II) chloride-glyme (9 mg, 0.04 mmol), 4,4'-di-tert-butyl-2,2'-dipyridyl (16.1 mg, 0.06 mmol), cesium carbonate (196.5 mg, 0.6 mmol) and DMF (20 mL) gave, after purification by column chromatography on silica gel, eluting with hexane–EtOAc (9:1), the piperazine **2e** (170 mg, 70%) as a colourless oil;  $R_f = 0.82$  [hexane–EtOAc (4:1)]; FT-IR  $\nu_{\text{max}}$  (ATR)/ $\text{cm}^{-1}$  2975, 2818, 2228, 1608, 1687, 1493, 1164, 769;  $^1\text{H}$  NMR (400 MHz,  $\text{CDCl}_3$ )  $\delta$  7.62 (d, 2H,  $J = 8$  Hz), 7.33 (d, 2H,  $J = 8$  Hz), 7.27–7.26 (m, 2H), 7.24–7.21 (m, 3H), 5.17 (br s, 1H), 3.96 (br d, 1H,  $J = 12$  Hz), 3.16 (br d, 1H,  $J = 12$  Hz), 3.07 (td, 1H,  $J = 12$  Hz, 4 Hz), 2.80 (br d, 1H,  $J = 12$  Hz), 2.65 (dd, 1H,  $J = 12$  Hz, 4 Hz), 2.34 (td, 1H,  $J = 12$  Hz, 4 Hz), 1.44 (s, 9H), 1.36 (s, 3H), 1.34 (s, 3H);  $^{13}\text{C}$  NMR (100 MHz,  $\text{CDCl}_3$ )  $\delta$  155.0, 147.9, 146.8, 131.9, 127.9, 127.8, 126.5, 126.1, 119.0, 110.3, 80.2, 59.7, 54.3, 49.5, 46.1, 41.4, 28.3, 24.4, 22.6; HRMS (ESI-TOF)  $m/z$ :  $[\text{M}+\text{H}]^+$  Calcd for  $\text{C}_{25}\text{H}_{32}\text{N}_3\text{O}_2$  406.2495. Found 406.2495.

*1-(tert-Butoxycarbonyl)-2-(4-chlorophenyl)-4-(2-phenylpropan-2-yl)piperazine (2f)*

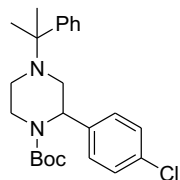

(±)-**2f**

Using general procedure B, carboxylic acid **1** (209 mg, 0.6 mmol),  $\text{Ir}[\text{dF}(\text{CF}_3)\text{ppy}]_2(\text{dtbbpy})\text{PF}_6$  (4.5 mg, 4  $\mu\text{mol}$ ), 1-chloro-4-iodobenzene (240 mg, 1.0 mmol), nickel(II) chloride-glyme (9 mg, 0.04 mmol), 4,4'-di-tert-butyl-2,2'-dipyridyl (16.1 mg, 0.06 mmol), cesium carbonate (196.5 mg, 0.6 mmol) and DMF (20 mL) gave, after purification by column chromatography on silica gel, eluting with hexane–EtOAc (9:1), the piperazine **2f** (138 mg, 58%) as a colourless oil;  $R_f = 0.7$  [hexane–EtOAc (4:1)]; FT-IR  $\nu_{\text{max}}$  (ATR)/ $\text{cm}^{-1}$  2975, 2933,

2821, 1768, 1737, 1695, 1468, 1365, 1239, 1163, 964, 763;  $^1\text{H}$  NMR (400 MHz,  $\text{CDCl}_3$ )  $\delta$  7.35–7.23 (m, 2H), 7.31–7.26 (m, 2H), 7.24–7.21 (m, 5H), 5.13 (br s, 1H), 3.92 (br d, 1H,  $J = 12$  Hz), 3.20 (br d, 1H,  $J = 12$  Hz), 3.05 (td, 1H,  $J = 12$  Hz, 4 Hz), 2.76 (br d, 1H,  $J = 12$  Hz), 2.63 (dd, 1H,  $J = 12$  Hz, 4 Hz), 2.31 (td, 1H,  $J = 12$  Hz, 4 Hz), 1.45 (s, 9H), 1.37 (s, 3H), 1.35 (s, 3H);  $^{13}\text{C}$  NMR (100 MHz,  $\text{CDCl}_3$ )  $\delta$  155.0, 148.1, 139.5, 132.1, 128.7, 128.1, 127.9, 126.4, 126.2, 79.9, 59.8, 53.7, 49.3, 46.3, 41.0, 28.4, 23.6, 23.5; HRMS (ESI-TOF)  $m/z$ :  $[\text{M}+\text{H}]^+$  Calcd for  $\text{C}_{24}\text{H}_{32}^{35}\text{ClN}_2\text{O}_2$  415.2152. Found 415.2151. The enantiomers were resolved using HPLC (Amylose–2, n-hexane–isopropanol = 95:5, flow rate = 0.5 mL/min,  $\lambda = 254$  nm),  $t_R = 5.8$  min and 7.2 min.

For reaction on a larger scale:

Using general procedure B (reaction time 72 h), carboxylic acid **1** (2 g, 5.7 mmol),  $\text{Ir}[\text{dF}(\text{CF}_3)\text{ppy}]_2(\text{dtbbpy})\text{PF}_6$  (42.7 mg, 38  $\mu\text{mol}$ ), 1-chloro-4-iodobenzene (2.3 g, 9.5 mmol), nickel(II) chloride-glyme (85.5 mg, 0.4 mmol), 4,4'-di-tert-butyl-2,2'-dipyridyl (153 mg, 0.6 mmol), cesium carbonate (1.8 g, 5.7 mmol) and DMF (150 mL) gave, after purification by column chromatography on silica gel, eluting with hexane–EtOAc (9:1), the piperazine **2f** (1.2 g, 50%) as a colourless oil; data as above.

*1-(tert-Butoxycarbonyl)-2-phenyl-4-(2-phenylpropan-2-yl)piperazine (2g)*

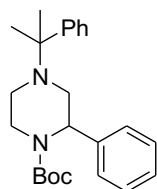

(±)-**2g**

Using general procedure B, carboxylic acid **1** (209 mg, 0.6 mmol),  $\text{Ir}[\text{dF}(\text{CF}_3)\text{ppy}]_2(\text{dtbbpy})\text{PF}_6$  (4.5 mg, 4  $\mu\text{mol}$ ), iodobenzene (0.12 mL, 1.0 mmol), nickel(II) chloride-glyme (9 mg, 0.04 mmol), 4,4'-di-tert-butyl-2,2'-dipyridyl (16.1 mg, 0.06 mmol), cesium carbonate (196.5 mg, 0.6 mmol) and DMF (20 mL) gave, after purification by column chromatography on silica gel, eluting with hexane–EtOAc (9:1), the piperazine **2g** (68 mg, 30%) as a colourless oil;  $R_f = 0.9$  [hexane–EtOAc (4:1)]; FT-IR  $\nu_{\text{max}}$  (ATR)/ $\text{cm}^{-1}$  2973, 2927, 2814, 1690, 1413, 1164, 698;  $^1\text{H}$  NMR (400 MHz,  $\text{CDCl}_3$ )  $\delta$  7.38–7.29 (m, 6H), 7.26–7.19 (m, 4H), 5.20 (br s, 1H), 3.94 (d, 1H,  $J = 12$  Hz), 3.29 (d, 1H,  $J = 12$  Hz), 3.12 (td, 1H,  $J = 12$ , 4 Hz), 2.75 (br d, 1H,  $J = 12$  Hz), 2.67 (dd, 1H,  $J = 12$  Hz, 4 Hz), 2.33 (td, 1H,  $J = 12$  Hz, 4 Hz), 1.47 (s, 9H), 1.39 (s, 3H), 1.36 (s, 3H);  $^{13}\text{C}$  NMR (100 MHz,  $\text{CDCl}_3$ )  $\delta$  155.2, 148.4, 140.9, 128.0, 127.9, 127.2, 126.4, 126.32, 126.3, 79.7, 59.8, 54.3, 49.2, 46.4, 41.0, 28.4, 24.0, 23.3; HRMS (ESI-TOF)  $m/z$ :  $[\text{M}+\text{H}]^+$  Calcd for  $\text{C}_{24}\text{H}_{33}\text{N}_2\text{O}_2$  381.2542. Found 381.2542. The enantiomers were resolved using HPLC (Cellulose–2, n-hexane–isopropanol = 99:1, flow rate = 0.5 mL/min,  $\lambda = 254$  nm),  $t_R = 13.0$  and 19.0 min.

*1-(tert-Butoxycarbonyl)-2-(3-methoxyphenyl)-4-(2-phenylpropan-2-yl)piperazine (2h)*

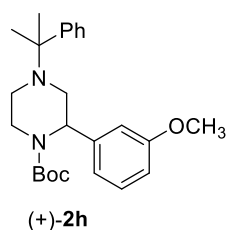

Using general procedure B, carboxylic acid **1** (627 mg, 1.8 mmol), Ir[dF(CF<sub>3</sub>)ppy]<sub>2</sub>(dtbbpy)PF<sub>6</sub> (13.5 mg, 12 μmol), 3-iodoanisole (0.38 mL, 3.0 mmol), nickel(II) chloride-glyme (27 mg, 0.12 mmol), 4,4'-di-tert-butyl-2,2'-dipyridyl (48.3 mg, 0.18 mmol), cesium carbonate (589 mg, 1.8 mmol) and DMF (40 mL) gave, after purification by column chromatography on silica gel, eluting with hexane–EtOAc (9:1), the piperazine **2h** (310 mg, 42%) as a colourless oil; R<sub>f</sub> = 0.75 [hexane–EtOAc (4:1)]; FT-IR ν<sub>max</sub> (ATR)/cm<sup>-1</sup> 2973, 2936, 2812, 1693, 1602, 1414, 1169, 766; <sup>1</sup>H NMR (400 MHz, CDCl<sub>3</sub>) δ 7.38–7.36 (m, 2H), 7.27–7.18 (m, 4H), 6.93–6.91 (m, 2H), 6.84–6.81 (m, 1H), 5.17 (br s, 1H), 3.92 (d, 1H, J = 12 Hz), 3.81 (s, 3H), 3.28 (d, 1H, J = 12 Hz), 3.12 (td, 1H, J = 12, 4 Hz), 2.72 (br d, 1H, J = 12 Hz), 2.65 (dd, 1H, J = 12 Hz, 4 Hz), 2.30 (td, 1H, J = 12 Hz, 4 Hz), 1.46 (s, 9H), 1.39 (s, 3H), 1.35 (s, 3H); <sup>13</sup>C NMR (100 MHz, CDCl<sub>3</sub>) δ 159.5, 155.1, 148.4, 142.7, 128.9, 127.9, 126.29, 126.26, 119.7, 112.9, 112.0, 79.7, 59.8, 55.1, 54.2, 49.2, 46.4, 41.0, 28.4, 24.4, 23.0; HRMS (ESI-TOF) m/z: [M+H]<sup>+</sup> Calcd for C<sub>25</sub>H<sub>35</sub>N<sub>2</sub>O<sub>3</sub> 411.2648. Found 411.2650.

*1-(tert-Butoxycarbonyl)-2-(4-methylphenyl)-4-(2-phenylpropan-2-yl)piperazine (2i)*

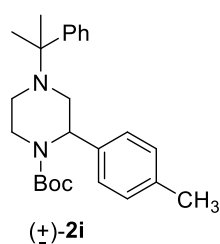

Using general procedure B, carboxylic acid **1** (627 mg, 1.8 mmol), Ir[dF(CF<sub>3</sub>)ppy]<sub>2</sub>(dtbbpy)PF<sub>6</sub> (13.5 mg, 12 μmol), 4-iodotoluene (654 mg, 3.0 mmol), nickel(II) chloride-glyme (27 mg, 0.12 mmol), 4,4'-di-tert-butyl-2,2'-dipyridyl (48.3 mg, 0.18 mmol), cesium carbonate (589 mg, 1.8 mmol) and DMF (40 mL) gave, after purification by column chromatography on silica gel, eluting with hexane–EtOAc (9:1), the piperazine **2i** (248 mg, 35%) as a colourless oil; R<sub>f</sub> = 0.9 [hexane–EtOAc (4:1)]; FT-IR ν<sub>max</sub> (ATR)/cm<sup>-1</sup> 2973, 2814, 1688, 1414, 1390, 1111, 1163, 700; <sup>1</sup>H NMR (400 MHz, CDCl<sub>3</sub>) δ 7.41–7.39 (m, 2H), 7.29–7.22 (m, 5H), 7.16 (d, 2H, J = 8 Hz), 5.18 (br s, 1H), 3.92 (d, 1H, J = 12 Hz), 3.29 (d, 1H, J = 12 Hz), 3.08 (td, 1H, J = 12, 4 Hz), 2.72 (dd, 1H, J = 12, 4 Hz), 2.65 (dd, 1H, J = 12 Hz, 4 Hz), 2.40 (s, 3H), 2.31 (td, 1H, J = 12 Hz, 4 Hz), 1.48 (s, 9H), 1.39 (s, 3H), 1.37 (s, 3H); <sup>13</sup>C NMR (100 MHz, CDCl<sub>3</sub>) δ 155.1, 148.4, 137.8, 135.8, 128.7, 127.9, 127.2, 126.35, 126.3, 79.6, 59.8, 53.9, 49.0, 46.5, 40.8, 28.4, 24.3, 23.0, 21.0; HRMS

(ESI-TOF)  $m/z$ :  $[M+H]^+$  Calcd for  $C_{25}H_{35}N_2O_2$  395.2699. Found 395.2700. The enantiomers were resolved using HPLC (Amylose-2, n-hexane-isopropanol = 95:5, flow rate = 0.5 mL/min,  $\lambda$  = 254 nm),  $t_R$  = 12.9 and 18.7 min

## 2.4 Racemic lithiation-trapping

Table S1 shows the lithiation of substrates **2b**, **2c**, **2f-g** with trapping after different times with methyl chloroformate. In all cases, yields of the disubstituted products were similar, indicating that lithiation is rapid at low temperature.

**Table S1.** Optimization of the lithiation-trapping

| Entry | R                  | n-BuLi (equiv) | t (min) | Yield (%) |
|-------|--------------------|----------------|---------|-----------|
| 1     | Cl                 | 1.2            | 5       | 52        |
| 2     | Cl                 | 1.2            | 10      | 56        |
| 3     | Cl                 | 1.2            | 20      | 55        |
| 4     | Cl                 | 1.6            | 10      | 52        |
| 5     | F                  | 1.2            | 10      | 58        |
| 6     | H                  | 1.2            | 10      | 60        |
| 7     | <sup>t</sup> BuCOO | 1.2            | 10      | 57        |
| 8     | CH <sub>3</sub>    | 1.2            | 10      | 62        |

*2-(4-tert-Butoxycarbonyl-phenyl)-4-(1-methyl-1-phenylethyl)-piperazine-1,2-dicarboxylic acid 1-tert-butyl ester 2-methyl ester (3b)*

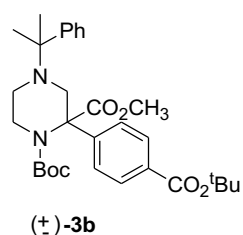

n-BuLi (0.11 mL, 0.26 mmol, 1.2 eqv, 2.4 M in hexanes) was added to piperazine **2b** (100 mg, 0.22 mmol) in dry THF (1 mL) at  $-78$  °C. After 10 min, MeOCOCl (0.04 mL, 0.44 mmol) was added. The mixture was allowed to warm to room temperature. After 1 h, MeOH (2 mL) was

added. The solvent was evaporated and the residue was purified by column chromatography on silica gel, eluting with hexane–EtOAc (9:1) to give the piperazine **3b** (62 mg, 55%) as a yellow oil;  $R_f = 0.6$  [hexane–EtOAc (4:1)]; FT-IR  $\nu_{\max}$  (ATR)/ $\text{cm}^{-1}$  2973, 2924, 2877, 2829, 1748, 1709, 1366, 1117, 701;  $^1\text{H}$  NMR (400 MHz,  $\text{CDCl}_3$ )  $\delta$  7.93 (d, 2H,  $J = 8$  Hz), 7.43 (d, 2H,  $J = 8$  Hz), 7.32–7.30 (m, 2H), 7.27–7.20 (m, 3H), 3.90 (s, 3H), 3.72 (br s, 1H), 3.40 (br s, 1H), 3.32 (d, 1H,  $J = 12$  Hz), 2.67–2.61 (m, 2H), 2.46 (td, 1H,  $J = 12$  Hz, 4 Hz), 1.62 (s, 9H), 1.30 (s, 3H), 1.27 (s, 3H), 1.14 (br s, 9H);  $^{13}\text{C}$  NMR (100 MHz,  $\text{CDCl}_3$ , two C could not be observed)  $\delta = 171.1, 165.6, 156.6, 147.8, 130.2, 128.9, 128.0, 126.5, 126.1, 125.9, 80.9, 80.5, 59.5, 58.8, 52.4, 46.3, 44.4, 28.2, 27.8, 26.4, 21.2$ ; HRMS (ESI-TOF)  $m/z$ :  $[\text{M}+\text{H}]^+$  Calcd for  $\text{C}_{31}\text{H}_{43}\text{N}_2\text{O}_6$  is 539.3121. Found 539.3143. The enantiomers were resolved using HPLC (Cellulose–2, n-hexane–isopropanol = 95:5, flow rate = 1.0 mL/min,  $\lambda = 254$  nm),  $t_R = 5.1$  min and 7.5 min.

*2-(4-Fluorophenyl)-4-(1-methyl-1-phenylethyl)-piperazine-1,2-dicarboxylic acid 1-tert-butyl ester 2-methyl ester (3c)*

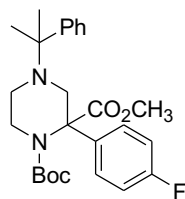

( $\pm$ )-**3c**

In the same way as piperazine **3b**, n-BuLi (0.12 mL, 0.30 mmol, 1.2 eqv, 2.4 M in hexanes), piperazine **2c** (100 mg, 0.25 mmol) and  $\text{MeOCOCl}$  (0.041 mL, 0.46 mmol) gave, after purification by column chromatography on silica gel, eluting with hexane–EtOAc (9:1), the piperazine **3c** (72 mg, 63%) as a colourless oil;  $R_f = 0.6$  [hexane–EtOAc (4:1)]; FT-IR  $\nu_{\max}$  (ATR)/ $\text{cm}^{-1}$  2975, 2880, 2822, 1746, 1698, 1508, 1365, 1294, 1246, 1165, 766, 701;  $^1\text{H}$  NMR (400 MHz,  $\text{CDCl}_3$ )  $\delta$  7.34–7.31 (m, 4H), 7.27–7.20 (m, 3H), 7.03–6.97 (m, 2H), 3.89 (s, 3H), 3.70 (br s, 1H), 3.42 (br s, 1H), 3.30 (d, 1H,  $J = 12$  Hz), 2.67–2.64 (m, 2H), 2.48 (td, 1H,  $J = 12$  Hz, 4 Hz), 1.31 (s, 3H), 1.29 (s, 3H), 1.19 (br s, 9H);  $^{13}\text{C}$  NMR (100 MHz,  $\text{CDCl}_3$ , two C could not be observed)  $\delta$  171.5, 161.5 (d,  $J = 243$  Hz), 156.7, 147.9, 128.1, 128.0, 126.4, 125.9, 114.4 (d,  $J = 21$  Hz), 80.3, 59.5, 58.8, 52.3, 46.2, 44.4, 27.8, 26.4, 21.2;  $^{19}\text{F}$  NMR (377 MHz,  $\text{CDCl}_3$ )  $\delta -116.73$ ; HRMS (ESI-TOF)  $m/z$ :  $[\text{M}+\text{H}]^+$  Calcd for  $\text{C}_{26}\text{H}_{34}\text{N}_2\text{O}_4$  is 457.2503. Found 457.2521. The enantiomers were resolved using HPLC (Amylose–2, n-hexane–isopropanol = 98:2, flow rate = 0.5 mL/min,  $\lambda = 254$  nm),  $t_R = 17.6$  min and 19.8 min. In addition, a small amount of the alkene **B** was obtained (9 mg, 8%) as an oil, which was partially characterized as follows:  $R_f = 0.4$  [hexane–EtOAc (4:1)];  $^1\text{H}$  NMR (400 MHz,  $\text{CDCl}_3$ )  $\delta$  7.89–7.86 (m, 3H), 7.61–7.59 (m, 2H), 7.13–7.08 (m, 4H), 5.91 (br s, 1H), 5.89 (br s, 1H), 3.92 (s, 3H), 3.07–3.03 (m, 2H), 2.70–2.67 (m, 2H), 1.47 (s, 3H), 1.43 (s, 3H), 1.28 (s, 9H).

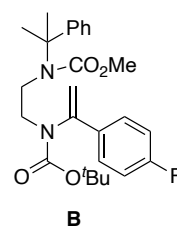

**B**

*2-(4-Chlorophenyl)-4-(1-methyl-1-phenylethyl)-piperazine-1,2-dicarboxylic acid 1-tert-butyl ester 2-methyl ester (3f)*

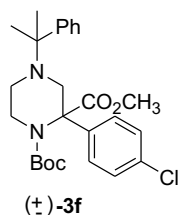

In the same way as piperazine **3b**, n-BuLi (0.12 mL, 0.29 mmol, 1.2 eqv, 2.4 M in hexanes), piperazine **2f** (100 mg, 0.24 mmol) and MeOCOCl (0.042 mL, 0.48 mmol) gave, after purification by column chromatography on silica gel, eluting with hexane–EtOAc (9:1), the piperazine **3f** (68 mg, 60%) as a colourless oil;  $R_f = 0.6$  [hexane–EtOAc (4:1)]; FT-IR  $\nu_{\max}$  (ATR)/ $\text{cm}^{-1}$  2980, 2925, 1853, 1688, 1592, 1457, 1392, 1367, 1249, 1163, 765, 700;  $^1\text{H}$  NMR (400 MHz,  $\text{CDCl}_3$ )  $\delta$  7.32–7.30 (m, 3H), 7.27–7.20 (m, 6H), 3.88 (s, 3H), 3.69 (br s, 1H), 3.42 (br s, 1H), 3.30 (d, 1H,  $J = 12$  Hz), 2.67–2.59 (m, 2H), 2.48 (td, 1H,  $J = 12$  Hz, 4 Hz), 1.30 (s, 3H), 1.28 (s, 3H), 1.18 (br s, 9H);  $^{13}\text{C}$  NMR (100 MHz,  $\text{CDCl}_3$ )  $\delta$  171.3, 156.6, 147.8, 132.3, 128.3, 128.0, 127.85, 127.8, 126.4, 125.9, 80.5, 59.5, 58.8, 53.5, 52.5, 46.2, 44.4, 27.9, 26.5, 21.1; HRMS (ESI-TOF)  $m/z$ :  $[\text{M}+\text{H}]^+$  Calcd for  $\text{C}_{26}\text{H}_{34}^{35}\text{ClN}_2\text{O}_4$  is 473.2207. Found 473.2209. The enantiomers were resolved using HPLC (Amylose–2, n-hexane–isopropanol = 95:5, flow rate = 1.0 mL/min,  $\lambda = 254$  nm),  $t_R = 14.5$  min and 18.8 min.

*4-(1-Methyl-1-phenylethyl)-2-phenyl-piperazine-1,2-dicarboxylic acid 1-tert-butyl ester 2-methyl ester (3g)*

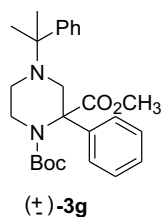

In the same way as piperazine **3b**, n-BuLi (0.14 mL, 0.31 mmol, 1.2 eqv, 2.4 M in hexanes), piperazine **2g** (100 mg, 0.26 mmol) and MeOCOCl (0.046 mL, 0.52 mmol) gave, after purification by column chromatography on silica gel, eluting with hexane–EtOAc (9:1), the piperazine **3g** (69 mg, 60%) as a colourless oil;  $R_f = 0.7$  [hexane–EtOAc (4:1)]; FT-IR  $\nu_{\max}$  (ATR)/ $\text{cm}^{-1}$  2975, 2930, 2877, 1744, 1695, 1493, 1390, 1364, 1345, 1245, 1165, 1021, 766, 699;  $^1\text{H}$  NMR (400 MHz,  $\text{CDCl}_3$ )  $\delta$  7.33–7.22 (m, 8H), 7.02–6.98 (m, 2H), 3.89 (s, 3H), 3.70 (br s, 1H), 3.42 (br s, 1H), 3.31 (d, 1H,  $J = 12$  Hz), 2.66–2.64 (m, 2H), 2.52–2.45 (m, 1H), 1.31 (s, 3H), 1.29 (s, 3H), 1.19 (br s, 9H);  $^{13}\text{C}$  NMR (100 MHz,  $\text{CDCl}_3$ )  $\delta$  171.4, 157.9, 148.1, 128.0, 127.7, 126.5, 126.4, 126.2, 126.0, 80.1, 59.5, 58.9, 53.9, 52.2, 46.4, 44.4, 27.8, 26.7, 21.1; HRMS (ESI-TOF)  $m/z$ :  $[\text{M}+\text{H}]^+$  Calcd for  $\text{C}_{26}\text{H}_{35}\text{N}_2\text{O}_4$  is 439.2597; Found 439.2587. The enantiomers were resolved using HPLC (Chiralpak-AD, n-hexane–isopropanol = 95:5, flow rate = 0.5 mL/min,  $\lambda = 254$  nm),  $t_R = 10.1$  min and 13.2 min.

*2-(4-Methylphenyl)-4-(1-methyl-1-phenylethyl)-piperazine-1,2-dicarboxylic acid 1-tert-butyl ester 2-methyl ester (3i)*

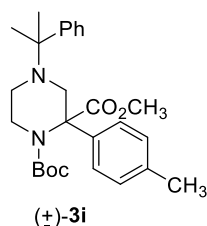

In the same way as piperazine **3b**, n-BuLi (0.14 mL, 0.30 mmol, 1.2 eqv, 2.4 M in hexanes), piperazine **2i** (100 mg, 0.25 mmol) and MeOCOCl (0.044 mL, 0.50 mmol) gave, after purification by column chromatography on silica gel, eluting with hexane–EtOAc (9:1), the piperazine **3i** (71 mg, 62%) as a colourless oil;  $R_f = 0.85$  [hexane–EtOAc (4:1)]; FT-IR  $\nu_{\max}$  (ATR)/ $\text{cm}^{-1}$  2972, 2932, 2877, 1744, 1698, 1364, 1345, 1244, 1166, 1020, 766, 701;  $^1\text{H}$  NMR (400 MHz,  $\text{CDCl}_3$ )  $\delta$  7.36–7.34 (m, 2H), 7.29–7.20 (m, 5H), 7.12 (d, 2H,  $J = 8$  Hz), 3.90 (s, 3H), 3.75–3.71 (m, 1H), 3.38–3.35 (m, 2H), 2.66–2.63 (m, 2H), 2.46 (td, 1H,  $J = 12, 4$  Hz), 2.37 (s, 3H), 1.31 (s, 3H), 1.29 (s, 3H), 1.16 (br s, 9H);  $^{13}\text{C}$  NMR (100 MHz,  $\text{CDCl}_3$ , one C could not be observed)  $\delta$  171.6, 156.9, 148.2, 136.1, 128.4, 128.0, 126.4, 126.2, 126.0, 80.0, 70.2, 59.5, 58.8, 52.2, 46.4, 44.5, 27.9, 26.7, 21.1, 20.9; HRMS (ESI-TOF)  $m/z$ :  $[\text{M}+\text{H}]^+$  Calcd for  $\text{C}_{27}\text{H}_{37}\text{N}_2\text{O}_4$  is 453.2753; Found 453.2795. The enantiomers were resolved using HPLC (Amylose–2, n-hexane–isopropanol = 95:5, flow rate = 0.5 mL/min,  $\lambda = 254$  nm),  $t_R = 13.4$  min and 15.1 min.

## 2.5 Kinetic resolution

**Table S2.** Optimization of kinetic resolution

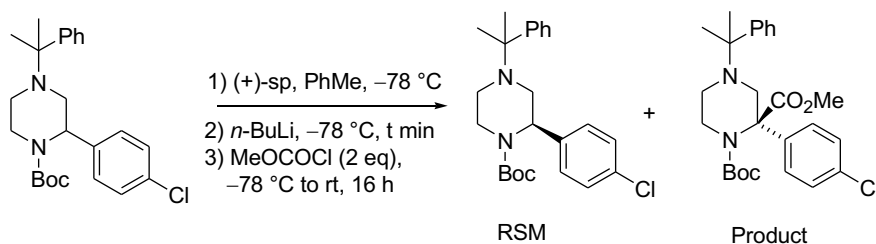

| Entry    | n-BuLi (eqv) | (+)-Sp (eqv) | t min     | RSM % Yield | RSM er      | Product % Yield | Product er  |
|----------|--------------|--------------|-----------|-------------|-------------|-----------------|-------------|
| 1        | 0.6          | 0.8          | 5         | 52          | 66:34       | 22              | 77:23       |
| 2        | 0.6          | 0.8          | 10        | 50          | 78:22       | 28              | 80:20       |
| 3        | 0.6          | 0.8          | 20        | 40          | 94:6        | 30              | 92:8        |
| <b>4</b> | <b>0.6</b>   | <b>0.8</b>   | <b>30</b> | <b>38</b>   | <b>99:1</b> | <b>28</b>       | <b>99:1</b> |
| 5        | 0.8          | 0.8          | 30        | 32          | 95:5        | 22              | 82:18       |

### Kinetic resolution of piperazine **2b**

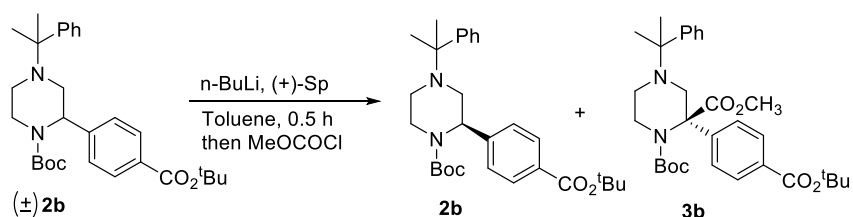

n-BuLi (0.10 mL, 0.25 mmol, 2.4 M in hexanes) was added to a mixture of (+)-sparteine (78 mg, 0.33 mmol) and the racemic piperazine **2b** (200 mg, 0.42 mmol) in dry PhMe (5.3 mL) at  $-78\text{ }^\circ\text{C}$ . After 0.5 h, MeOCOCl (0.07 mL, 0.84 mmol) was added and the mixture was allowed to warm to room temperature. After 1 h, MeOH (1 mL) was added. The solvent was evaporated and the residue was purified by column chromatography on silica gel, eluting with n-hexane–EtOAc (90:10), to give enantioenriched piperazine **2b** (82 mg, 41%) as a yellow oil; data as above; er 90:10 by CSP-HPLC as described above (major component eluted at 19.2 min);  $[\alpha]_{\text{D}}^{20} -64$  (c 1.0,  $\text{CHCl}_3$ ). In addition, the ester **3b** (69 mg, 31%) was isolated as a yellow oil, data as above; er 92:8 by CSP-HPLC (major component eluted at 5.1 min);  $[\alpha]_{\text{D}}^{20} +75$  (c 1.0,  $\text{CHCl}_3$ ).



### Kinetic resolution of piperazine **2c**

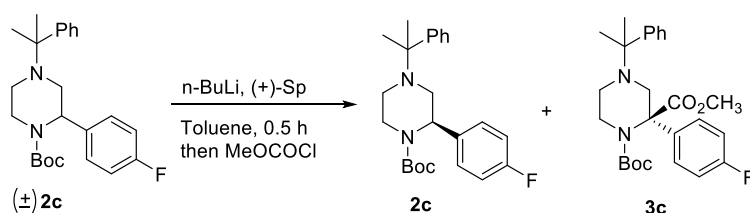

$n\text{-BuLi}$  (0.12 mL, 0.30 mmol, 2.4 M in hexanes) was added to a mixture of (+)-sparteine (94 mg, 0.40 mmol) and the racemic piperazine **2c** (200 mg, 0.50 mmol) in dry PhMe (6.2 mL) at  $-78^\circ\text{C}$ . After 0.5 h,  $\text{MeOCOCl}$  (0.08 mL, 1.0 mmol) was added and the mixture was allowed to warm to room temperature. After 1 h, MeOH (1 mL) was added. The solvent was evaporated and the residue was purified by column chromatography on silica gel, eluting with  $n\text{-hexane-EtOAc}$  (90:10), to give enantioenriched piperazine **2c** (80 mg, 40%) as a colourless oil; data as above; er 98:2 by CSP-HPLC as described above (major component eluted at 11.2 min);  $[\alpha]_{\text{D}}^{20} -52$  ( $c$  1.0,  $\text{CHCl}_3$ ). In addition, the ester **3c** (68 mg, 30%) was isolated as a colourless oil, data as above; er 98:2 by CSP-HPLC (major component eluted at 16.9 min);  $[\alpha]_{\text{D}}^{20} +82$  ( $c$  1.0,  $\text{CHCl}_3$ ).

### Kinetic resolution of piperazine **2f**

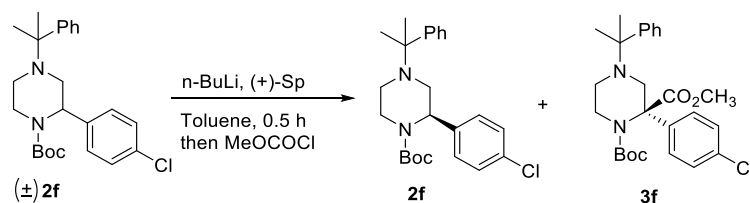

$n\text{-BuLi}$  (0.12 mL, 0.29 mmol, 2.4 M in hexanes) was added to a mixture of (+)-sparteine (90 mg, 0.38 mmol) and the racemic piperazine **2f** (200 mg, 0.48 mmol) in dry PhMe (6 mL) at  $-78^\circ\text{C}$ . After 0.5 h,  $\text{MeOCOCl}$  (0.08 mL, 0.96 mmol) was added and the mixture was allowed to warm to room temperature. After 1 h, MeOH (1 mL) was added. The solvent was evaporated and the residue was purified by column chromatography on silica gel, eluting with  $n\text{-hexane-EtOAc}$  (90:10), to give enantioenriched piperazine **2f** (76 mg, 38%) as a colourless oil; data as above; er 99:1 by CSP-HPLC as described above (major component eluted at 4.0 min);  $[\alpha]_{\text{D}}^{20} -46$  ( $c$  1.0,  $\text{CHCl}_3$ ). In addition, the ester **3f** (64 mg, 28%) was isolated as a colourless oil, data as above; er 99:1 by CSP-HPLC (major component eluted at 14.9 min);  $[\alpha]_{\text{D}}^{20} +28$  ( $c$  1.0,  $\text{CHCl}_3$ ).

### Kinetic resolution of piperazine **2g**

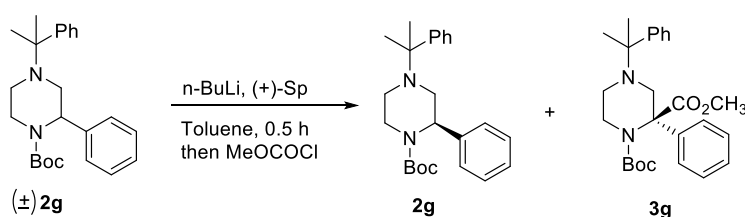

n-BuLi (0.13 mL, 0.32 mmol, 2.4 M in hexanes) was added to a mixture of (+)-sparteine (98 mg, 0.42 mmol) and the racemic piperazine **2g** (200 mg, 0.53 mmol) in dry PhMe (6.6 mL) at  $-78^{\circ}\text{C}$ . After 0.5 h, MeOCOCl (0.09 mL, 1.06 mmol) was added and the mixture was allowed to warm to room temperature. After 1 h, MeOH (1 mL) was added. The solvent was evaporated and the residue was purified by column chromatography on silica gel, eluting with n-hexane–EtOAc (90:10), to give enantioenriched piperazine **2g** (88 mg, 44%) as a colourless oil; data as above; er 82:18 by CSP-HPLC as described above (major component eluted at 12.5 min);  $[\alpha]_{\text{D}}^{20} -32$  ( $c$  1.0,  $\text{CHCl}_3$ ). In addition, the ester **3g** (69 mg, 30%) was isolated as a colourless oil, data as above; er 99:1 by CSP-HPLC (major component eluted at 12.3 min);  $[\alpha]_{\text{D}}^{20} +62$  ( $c$  1.0,  $\text{CHCl}_3$ ).

### Kinetic resolution of piperazine **2i**

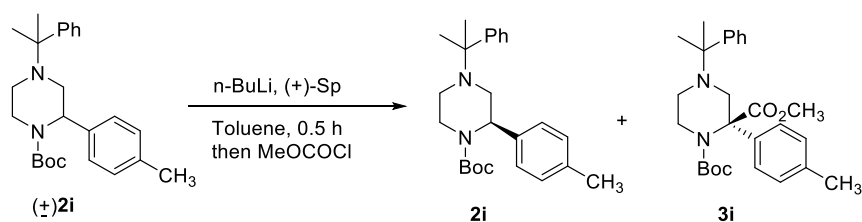

n-BuLi (0.13 mL, 0.30 mmol, 2.4 M in hexanes) was added to a mixture of (+)-sparteine (97 mg, 0.41 mmol) and the racemic piperazine **2i** (200 mg, 0.51 mmol) in dry PhMe (6.4 mL) at  $-78^{\circ}\text{C}$ . After 0.5 h, MeOCOCl (0.10 mL, 1.2 mmol) was added and the mixture was allowed to warm to room temperature. After 1 h, MeOH (1 mL) was added. The solvent was evaporated and the residue was purified by column chromatography on silica gel, eluting with n-hexane–EtOAc (90:10), to give enantioenriched piperazine **2i** (88 mg, 44%) as a colourless oil; data as above; er 99:1 by CSP-HPLC as described above (major component eluted at 13.4 min);  $[\alpha]_{\text{D}}^{20} -56$  ( $c$  1.0,  $\text{CHCl}_3$ ). In addition, the ester **3i** (73 mg, 32%) was isolated as a colourless oil, data as above; er 96:4 by CSP-HPLC (major component eluted at 13.4 min);  $[\alpha]_{\text{D}}^{20} +36$  ( $c$  1.0,  $\text{CHCl}_3$ ).

## 2.6 Further functionalization

2-(4-Fluorophenyl)-2-methyl-4-(1-methyl-1-phenylethyl)-piperazine-1-carboxylic acid tert-butyl ester **4** (racemic)

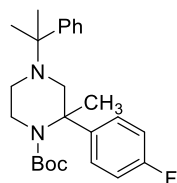

n-BuLi (0.25 mL, 0.35 mmol, 2.4 M in hexanes) was added to racemic piperazine **2c** (115 mg, 0.29 mmol) in dry THF (1.2 mL) at  $-78^{\circ}\text{C}$ . After 10 min, methyl iodide (0.10 mL, 1.45 mmol) was added. After 1 h, MeOH (1 mL) was added and the mixture was allowed to warm to room temperature. The solvent was evaporated and the mixture was purified by column chromatography on silica gel, eluting with hexane–EtOAc (4:1), to give the piperazine ( $\pm$ )-**4** (95 mg, 80%) as a colourless oil;  $R_f = 0.7$  [hexane–EtOAc (7:3)]; FT-IR  $\nu_{\text{max}}$  (ATR)/ $\text{cm}^{-1}$  2975, 2935, 2877, 2816, 1687, 1602, 1231, 833;  $^1\text{H}$  NMR (400 MHz,  $\text{CDCl}_3$ )  $\delta$  7.49 (d, 2H,  $J = 8$  Hz), 7.32–7.29 (m, 4H), 7.24–7.21 (m, 1H), 7.00–6.95 (m, 2H), 3.90 (dt, 1H,  $J = 12$  Hz, 4 Hz), 3.30 (td, 1H,  $J = 12$  Hz, 4 Hz), 2.86 (dt, 1H,  $J = 12$  Hz, 4 Hz), 2.50–2.39 (m, 2H), 2.30 (d, 1H,  $J = 12$  Hz), 1.73 (s, 3H), 1.33 (s, 3H), 1.29 (s, 3H), 1.12 (s, 9H);  $^{13}\text{C}$  NMR (100 MHz,  $\text{CDCl}_3$ )  $\delta$  161.1 (d,  $J = 242$  Hz), 156.2, 148.5, 144.0 (d,  $J = 3$  Hz), 127.9, 126.6 (d,  $J = 7$  Hz), 126.4, 126.1, 114.3 (d,  $J = 21$  Hz), 79.6, 61.7, 60.5, 59.3, 46.4, 43.3, 28.0, 24.0, 23.5, 20.1;  $^{19}\text{F}$  NMR (377 MHz,  $\text{CDCl}_3$ )  $\delta$   $-118.13$ ; HRMS (ESI-TOF)  $m/z$ :  $[\text{M}+\text{H}]^+$  Calcd for  $\text{C}_{25}\text{H}_{34}\text{FN}_2\text{O}_2$  is 413.2604. Found 413.2604. The enantiomers were resolved using HPLC (Amylose–2, n-hexane–isopropanol = 80:20, flow rate = 0.8 mL/min,  $l = 254$  nm),  $t_R = 22.5$  min and 24.7 min.

2-(4-Fluorophenyl)-2-methyl-4-(1-methyl-1-phenylethyl)-piperazine-1-carboxylic acid tert-butyl ester **4** (enantioenriched)

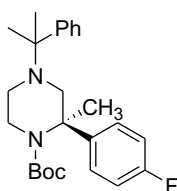

In the same way as racemic **4**, piperazine (*R*)-**2c** (80 mg, 0.20 mmol, er 98:2), n-BuLi (0.17 mL, 0.24 mmol, 2.4 M in hexanes) and MeI (0.07 mL, 1.0 mmol) gave, after purification on silica gel, eluting with hexane–EtOAc (4:1), the piperazine **4** (66 mg, 80%) as a colourless oil; data as above; er 96:4 by CSP-HPLC as described above (major component eluted at 22.8 min);  $[\alpha]_D^{20} +24$  ( $c$  1.0,  $\text{CHCl}_3$ ).

*2-(4-Fluorophenyl)-2-methyl-piperazine-1-carboxylic acid tert-butyl ester 5 (racemic)*

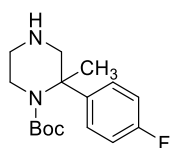

Pd(OH)<sub>2</sub>/C (20%) (8 mg), ammonium formate (48 mg, 0.75 mmol) and MeOH (10 mL) were added to piperazine **4** (racemic) (60 mg, 0.15 mmol) and the mixture was heated under reflux. After 2 h, the mixture was cooled to room temperature, filtered through celite, and evaporated. EtOAc (50 mL) was added and the mixture was washed with water (100 mL), brine (100 mL), dried (MgSO<sub>4</sub>) and evaporated to give the piperazine **5** (42 mg, 98%) as a colourless oil; FT-IR  $\nu_{\text{max}}$  (ATR)/cm<sup>-1</sup> 2976, 2932, 2871, 1679, 1602, 1509, 1454, 1160, 857; <sup>1</sup>H NMR (400 MHz, CDCl<sub>3</sub>)  $\delta$  7.32–7.30 (m, 2H), 7.02–6.98 (m, 2H), 3.84–3.78 (m, 1H), 3.36 (dt, 1H, *J* = 12 Hz, 4 Hz), 3.16–3.11 (m, 1H), 3.03–2.96 (m, 1H), 2.84 (d, 1H, *J* = 12 Hz), 2.74 (d, 1H, *J* = 12 Hz), 1.78 (s, 1H), 1.72 (s, 3H), 1.15 (s, 9H); <sup>13</sup>C NMR (100 MHz, CDCl<sub>3</sub>)  $\delta$  162.2 (d, *J* = 243 Hz), 156.0, 143.3 (d, *J* = 17 Hz), 126.4 (d, *J* = 7 Hz), 114.7 (d, *J* = 21 Hz), 79.9, 59.7, 50.5, 45.2, 41.5, 28.0, 20.9; <sup>19</sup>F NMR (377 MHz, CDCl<sub>3</sub>)  $\delta$  -117.55; HRMS (ESI-TOF) *m/z*: [M+H]<sup>+</sup> Calcd for C<sub>16</sub>H<sub>24</sub>FN<sub>2</sub>O<sub>2</sub> 295.1822. Found 295.1820. The enantiomers were resolved using HPLC (Cellulose-1, n-hexane-isopropanol = 85:15, flow rate = 0.8 mL/min,  $\lambda$  = 254 nm), *t*<sub>R</sub> = 7.0 min and 8.6 min.

*2-(4-Fluorophenyl)-2-methyl-piperazine-1-carboxylic acid tert-butyl ester 5 (enantioenriched)*

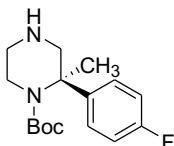

In the same way as racemic **5**, piperazine (*R*)-**4** (50 mg, 0.12 mmol, er 96:4) gave the piperazine **5** (35 mg, 98%) as a colourless oil; data as above; er 94:6 by CSP-HPLC as described above (major component eluted at 7.1 min); [ $\alpha$ ]<sub>D</sub><sup>20</sup> +36 (*c* 1.0, CHCl<sub>3</sub>).

2-(4-Chlorophenyl)-piperazine-1-carboxylic acid tert-butyl ester **6** (Racemic)

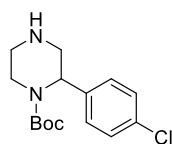

Pd(OH)<sub>2</sub>/C (20%) (20 mg), ammonium formate (114 mg, 1.8 mmol) and MeOH (20 mL) were added to piperazine **2f** (racemic) (150 mg, 0.36 mmol) and the mixture was heated under reflux. After 2 h, the mixture was cooled to room temperature, filtered through celite, and evaporated. The mixture was purified by column chromatography on silica gel, eluting with CH<sub>2</sub>Cl<sub>2</sub>-MeOH (9:1), to give the piperazine **6** (96 mg, 90%) as a colourless oil; *R<sub>f</sub>* 0.8 [CH<sub>2</sub>Cl<sub>2</sub>-MeOH (4:1)], FT-IR  $\nu_{\text{max}}$  (ATR)/cm<sup>-1</sup> 2974, 2928, 1678, 1476, 1364, 861; <sup>1</sup>H NMR (400 MHz, CDCl<sub>3</sub>)  $\delta$  7.39–7.35 (m, 2H), 7.29–7.24 (m, 2H), 5.20 (br s, 1H), 3.94 (br d, 1H, *J* = 12 Hz), 3.56 (br d, 1H, *J* = 12 Hz), 3.16 (dd, 1H, *J* = 12 Hz, 4 Hz), 3.02–2.95 (m, 2H), 2.84 (dd, 1H, *J* = 12 Hz, 4 Hz), 2.04 (br s, 1H), 1.47 (s, 9H); <sup>13</sup>C NMR (100 MHz, CDCl<sub>3</sub>)  $\delta$  155.4, 139.4, 128.7, 126.8, 80.0, 53.4, 48.5, 45.7, 40.6, 28.4; HRMS (ESI-TOF) *m/z*: [M+H]<sup>+</sup> Calcd for C<sub>15</sub>H<sub>22</sub><sup>35</sup>ClN<sub>2</sub>O<sub>2</sub> 297.1370. Found 297.1386. The enantiomers were resolved using HPLC (Amylose-2, n-hexane-isopropanol = 85:15, flow rate = 1.0 mL/min, *l* = 254 nm), *t<sub>R</sub>* = 16.2 min and 20.6 min.

2-(4-Chlorophenyl)-piperazine-1-carboxylic acid tert-butyl ester **6** (enantiomeriched)

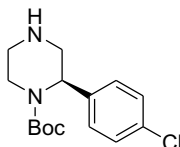

In the same way as racemic **6**, piperazine (*R*)-**2f** (50 mg, 0.12 mmol, er 99:1) gave the piperazine **6** (33 mg, 94%) as a colourless oil; data as above; er 99:1 by CSP-HPLC as described above (major component eluted at 16.4 min); [ $\alpha$ ]<sub>D</sub><sup>20</sup> -42 (*c* 1.0, CHCl<sub>3</sub>).

### 3-(4-Chlorophenyl)-1-(1-methyl-1-phenylethyl)-piperazine **7** (racemic)

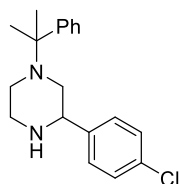

A solution of HCl in dioxane (2 mL, 4 M) was added to racemic piperazine **2f** (50 mg, 0.12 mmol) in dry MeOH (2 mL). After 18 h, the solvent was evaporated. Water (50 mL) and saturated aqueous NaHCO<sub>3</sub> solution (30 mL) were added, and the mixture was extracted with EtOAc (3 x 20 mL). The organic layers were washed with brine (50 mL), dried (MgSO<sub>4</sub>) and evaporated to give the piperazine **7** (37 mg, 97%) as a colourless oil; FT-IR  $\nu_{\text{max}}$  (ATR)/cm<sup>-1</sup> 2972, 2818, 1601, 1490, 1090, 765; <sup>1</sup>H NMR (400 MHz, CDCl<sub>3</sub>)  $\delta$  7.57 (d, 2H, *J* = 8 Hz), 7.35–7.29 (m, 5H), 7.27–7.21 (m, 2H), 3.83 (dd, 1H, *J* = 12 Hz, 4Hz), 3.10–2.97 (m, 2H), 2.83–2.74 (m, 2H), 2.34 (td, 1H, *J* = 12 Hz, 4Hz), 2.18–2.13 (m, 1H), 1.81 (br s, 1H), 1.38 (s, 3H), 1.36 (s, 3H); <sup>13</sup>C NMR (100 MHz, CDCl<sub>3</sub>)  $\delta$  149.0, 141.6, 132.9, 128.4, 128.4, 128.0, 126.2, 126.1, 60.6, 59.8, 54.5, 46.9, 46.2, 24.4, 23.8; HRMS (ESI-TOF) *m/z*: [M+H]<sup>+</sup> Calcd for C<sub>19</sub>H<sub>24</sub><sup>35</sup>ClN<sub>2</sub> 315.1628. Found 315.1624. The enantiomers were resolved using HPLC (Amylose-2, n-hexane–isopropanol = 85:15, flow rate = 1.0 mL/min,  $\lambda$  = 254 nm), *t<sub>R</sub>* = 16.2 min and 20.6 min.

### 3-(4-Chlorophenyl)-1-(1-methyl-1-phenylethyl)-piperazine **7** (enantioenriched)

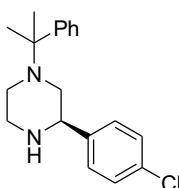

In the same way as racemic **7**, piperazine (*R*)-**2f** (80 mg, 0.19 mmol, er 99:1) gave the piperazine **7** (58 mg, 97%) as a colourless oil; data as above; er 99:1 by CSP-HPLC as described above (major component eluted at 16.4 min);  $[\alpha]_{\text{D}}^{20}$  –54 (*c* 1.0, CHCl<sub>3</sub>).

## 2.7 Synthesis of GSK-3 $\beta$ inhibitor

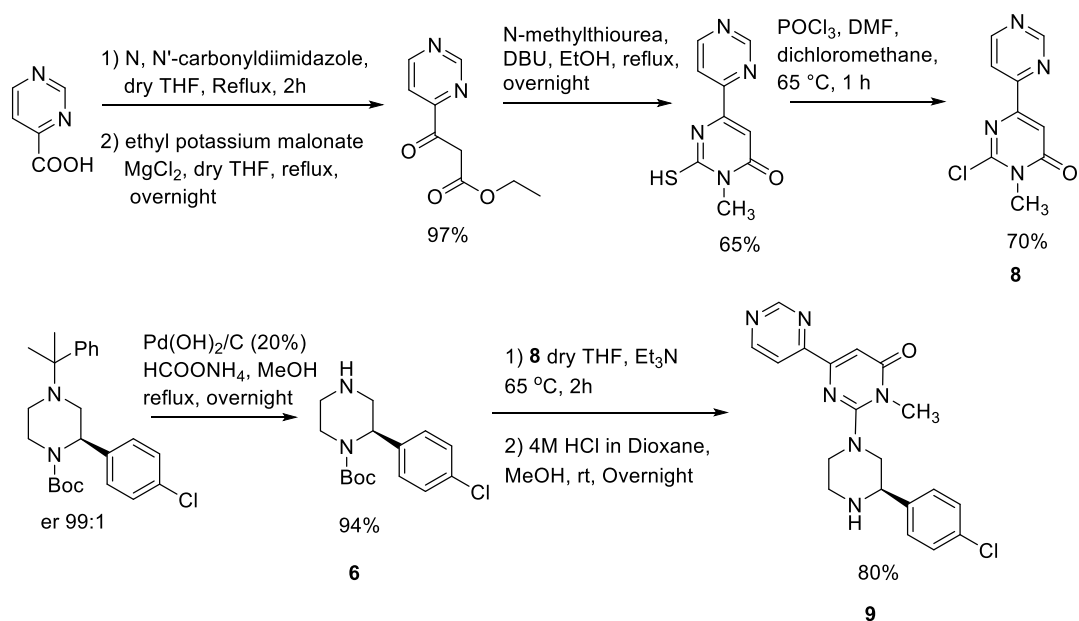

The pyrimidine **8** was prepared according to the literature (see scheme above).<sup>7</sup>

### Piperazine **9**

Pyrimidine **8** (112 mg, 0.50 mmol) in dry THF (5 mL) was added to piperazine **6** (150 mg, 0.50 mmol) and Et<sub>3</sub>N (0.22 mL, 1.5 mmol) in dry THF (20 mL) and the mixture was heated under reflux. After 2 h, the solvent was evaporated. EtOAc (50 mL) was added, and the mixture was washed with water (100 mL), brine (100 mL), dried (MgSO<sub>4</sub>) and evaporated. Purification by column chromatography on silica gel, eluting with hexane–EtOAc (2:3) gave the *N*-Boc-piperazine (207 mg, 85%) as a white amorphous solid; m.p. 62–64 °C; *R*<sub>f</sub> = 0.5 [hexane–EtOAc (3:2)]; <sup>1</sup>H NMR (400 MHz, CDCl<sub>3</sub>)  $\delta$  9.27 (d, 1H, *J* = 1 Hz), 8.88 (d, 1H, *J* = 5 Hz), 8.16 (dd, 1H, *J* = 5, 1 Hz), 7.36–7.30 (m, 2H), 7.26–7.19 (m, 3H), 5.45 (br d, 1H), 4.20 (br d, 1H, *J* = 12 Hz), 4.04 (br d, 1H, *J* = 12 Hz), 3.61–3.57 (m, 2H), 3.46 (td, 1H, *J* = 12 Hz, 4 Hz), 3.33 (s, 3H), 3.12 (td, 1H, *J* = 12 Hz, 4 Hz), 1.46 (s, 9H); <sup>13</sup>C NMR (100 MHz, CDCl<sub>3</sub>)  $\delta$  164.7, 160.8, 159.4, 158.7, 158.3, 155.5, 154.9, 139.4, 128.6, 127.3, 126.4, 117.8, 106.2, 80.7, 53.9, 51.7, 49.6, 39.5, 32.8, 28.3.

To this *N*-Boc-piperazine (125 mg, 0.26 mmol) in MeOH (2 mL) was added slowly a solution of HCl in dioxane (2 mL, 4 M) at room temperature. After 18 h, the solvent was evaporated. Water (50 mL) and saturated aqueous NaHCO<sub>3</sub> (30 mL) was added. The mixture was extracted with EtOAc (3 x 50 mL) and evaporated to give the piperazine **9** (93 mg, 94%) as a white amorphous solid; m.p. 56–58 °C; [ $\alpha$ ]<sub>D</sub><sup>20</sup> –42 (*c* 1.0, CHCl<sub>3</sub>); <sup>1</sup>H NMR (400 MHz, CDCl<sub>3</sub>)  $\delta$  9.27 (d, 1H, *J* = 1 Hz), 8.86 (d, 1H, *J* = 5 Hz), 8.17 (dd, 1H, *J* = 5, 1 Hz), 7.48–7.46 (m, 2H), 7.42–7.32 (m, 3H), 4.05 (dd, 1H, *J* = 12 Hz, 4 Hz), 3.68–3.63 (m, 2H), 3.58 (s, 3H), 3.29–3.20 (m, 3H), 3.09–3.03 (m, 1H), 2.08 (br s, 1H); <sup>13</sup>C NMR (100 MHz, CDCl<sub>3</sub>)  $\delta$  165.1, 161.1, 159.2, 158.6, 158.2, 155.6, 141.1, 128.6, 128.1, 127.0, 117.9, 105.7, 60.0, 56.5, 49.6, 45.7, 33.3.

### 3. VT-NMR spectra

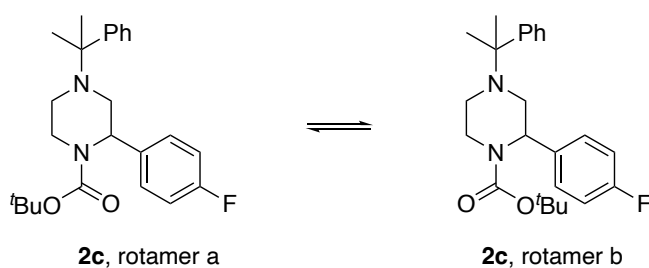

Coalescence of signals in the  $^1\text{H}$  NMR spectrum of carbamate **2c** in  $\text{D}_8\text{-THF}$  was followed by taking spectra at various temperatures. The ratio of the rotamers is  $\sim 1:1$ . The  $^1\text{H}$  NMR spectra in the region 5.40–3.10 ppm are shown below. The peak at 3.57 ppm is undeuterated THF.

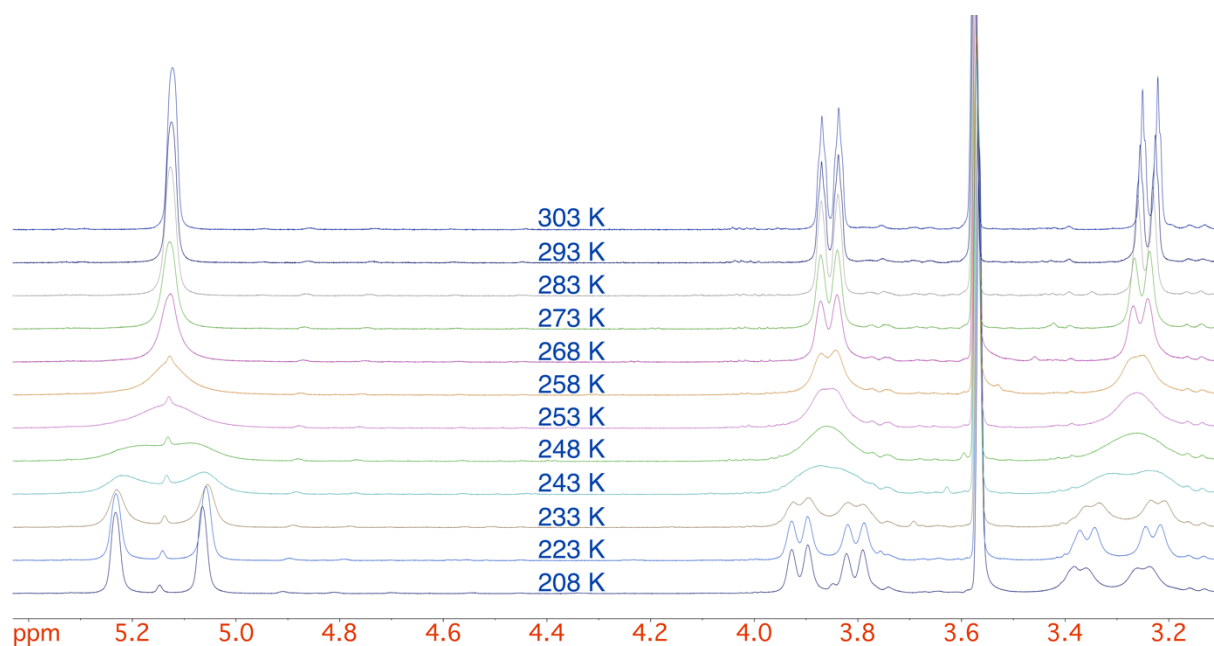

Assuming an equal rate between rotamers, the following rate constants can be estimated using line shape analysis (DNMR with the software iNMR)<sup>8</sup>:

**Table S-3.** Estimated rate constants from VT-NMR spectroscopy of carbamate **2c**.

| T/K | 1/T      | <i>k</i> | ln( <i>k</i> /T) |
|-----|----------|----------|------------------|
| 208 | 0.004808 | 1        | -5.33754         |
| 223 | 0.004484 | 16       | -2.63458         |
| 233 | 0.00429  | 35       | -1.89569         |
| 243 | 0.00411  | 80       | -1.11103         |
| 248 | 0.00403  | 100      | -0.90826         |
| 253 | 0.00395  | 180      | -0.34043         |
| 258 | 0.00388  | 300      | 0.15082          |
| 268 | 0.00373  | 700      | 0.96009          |
| 273 | 0.00366  | 900      | 1.19292          |
| 283 | 0.00353  | 1700     | 1.79294          |
| 293 | 0.00341  | 3000     | 2.32619          |
| 303 | 0.0033   | 7000     | 3.13993          |



Eyring plot:

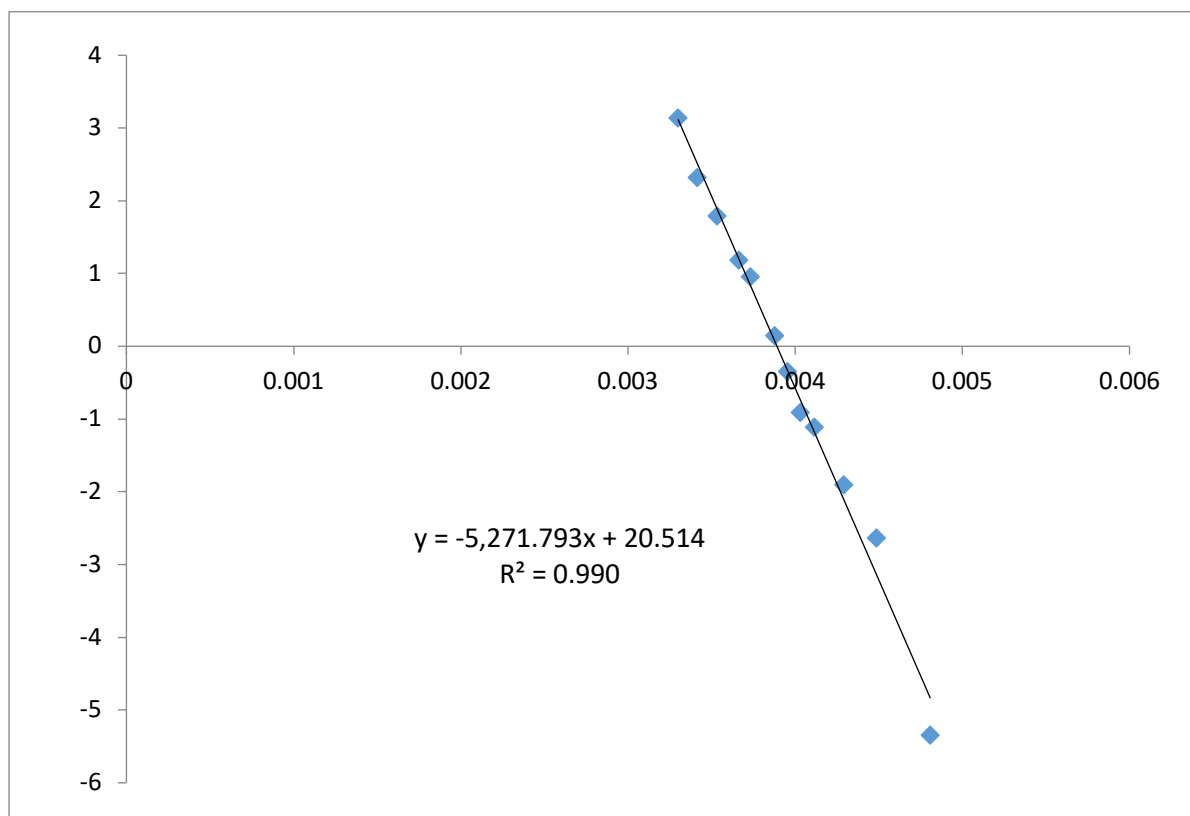

By using the Eyring equation, this gave the following data:

slope  $-5272$ , intercept  $20.5$

Approximate activation parameters for Boc rotation in THF:

$$\Delta H^\ddagger \approx 43.8 \text{ kJ/mol}$$

$$\Delta S^\ddagger \approx -27.0 \text{ J/mol}\cdot\text{K}$$

Hence the barrier to rotation  $\Delta G^\ddagger \approx 49.1 \text{ kJ/mol}$  at  $-78 \text{ }^\circ\text{C}$ .

The half-life for rotation is about  $2.4 \text{ sec}$  at  $-78 \text{ }^\circ\text{C}$ .

These data are very approximate as small variations in the rate constants affect the values significantly, although the overall barrier is in line with expectations and with the DFT calculations (see Section 6, page S-67).

#### 4. NMR spectra

$^1\text{H}$  NMR spectrum ( $\text{CDCl}_3$ , 400 MHz) of **b**:

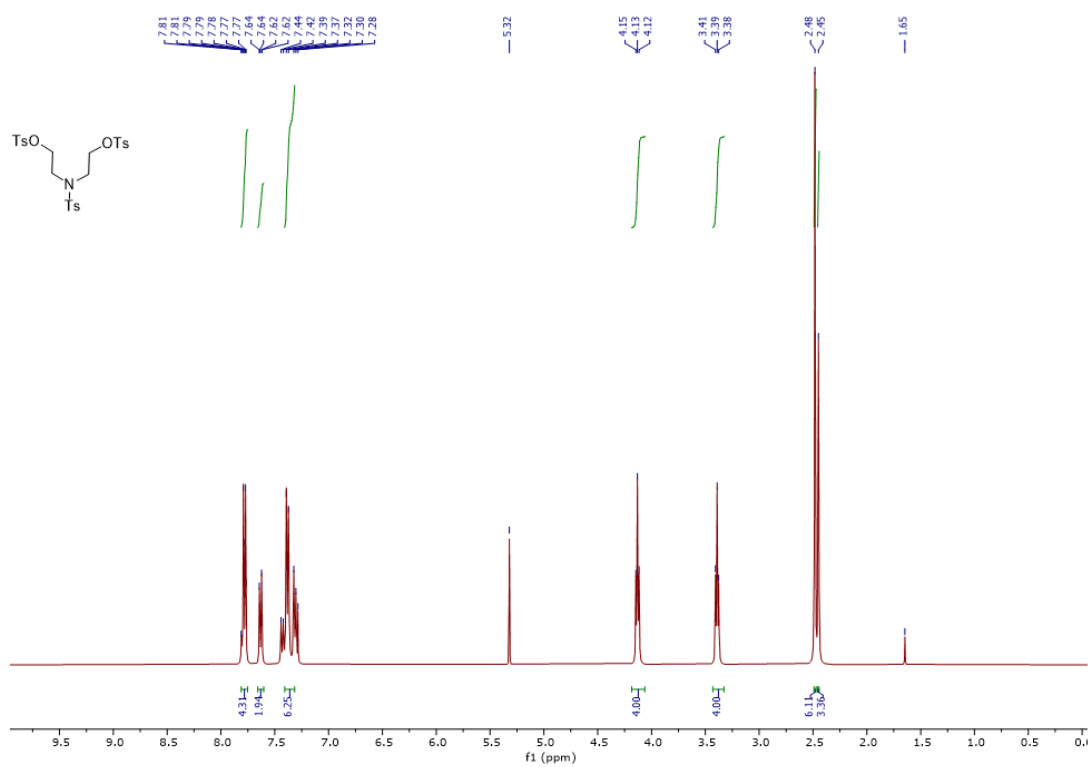

$^1\text{H}$  NMR spectrum ( $\text{CDCl}_3$ , 400 MHz) of **c**:

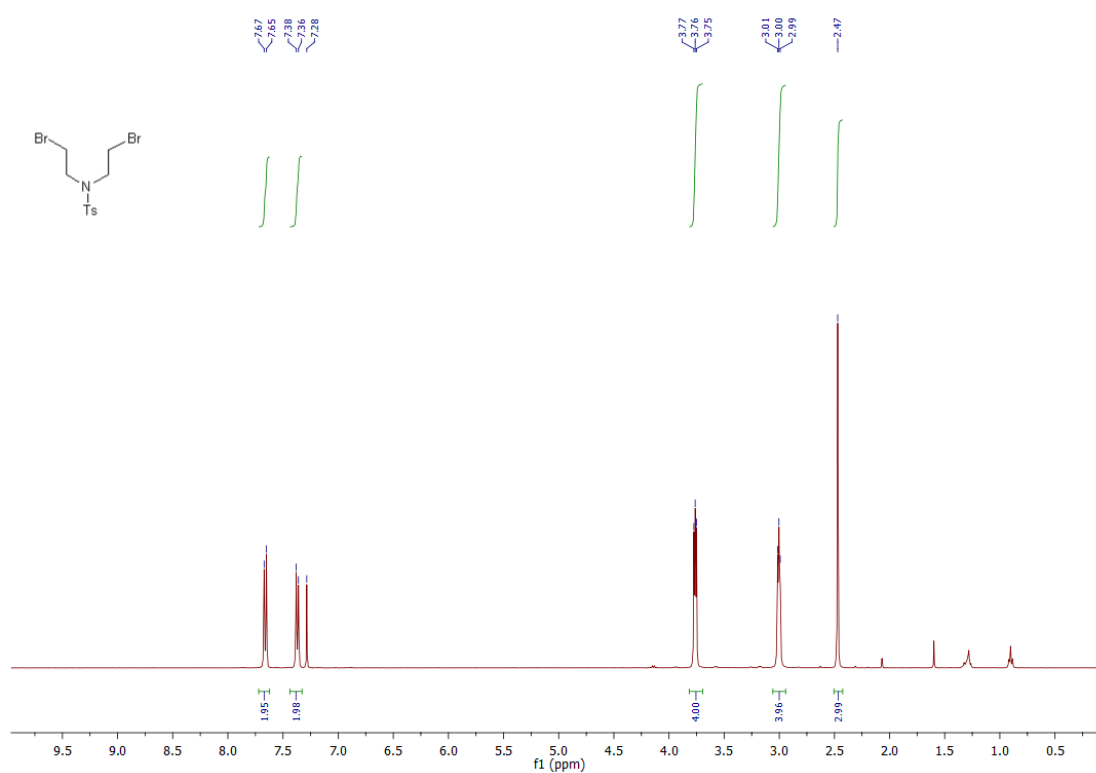

<sup>1</sup>H NMR spectrum (CDCl<sub>3</sub>, 400 MHz) of **d**:

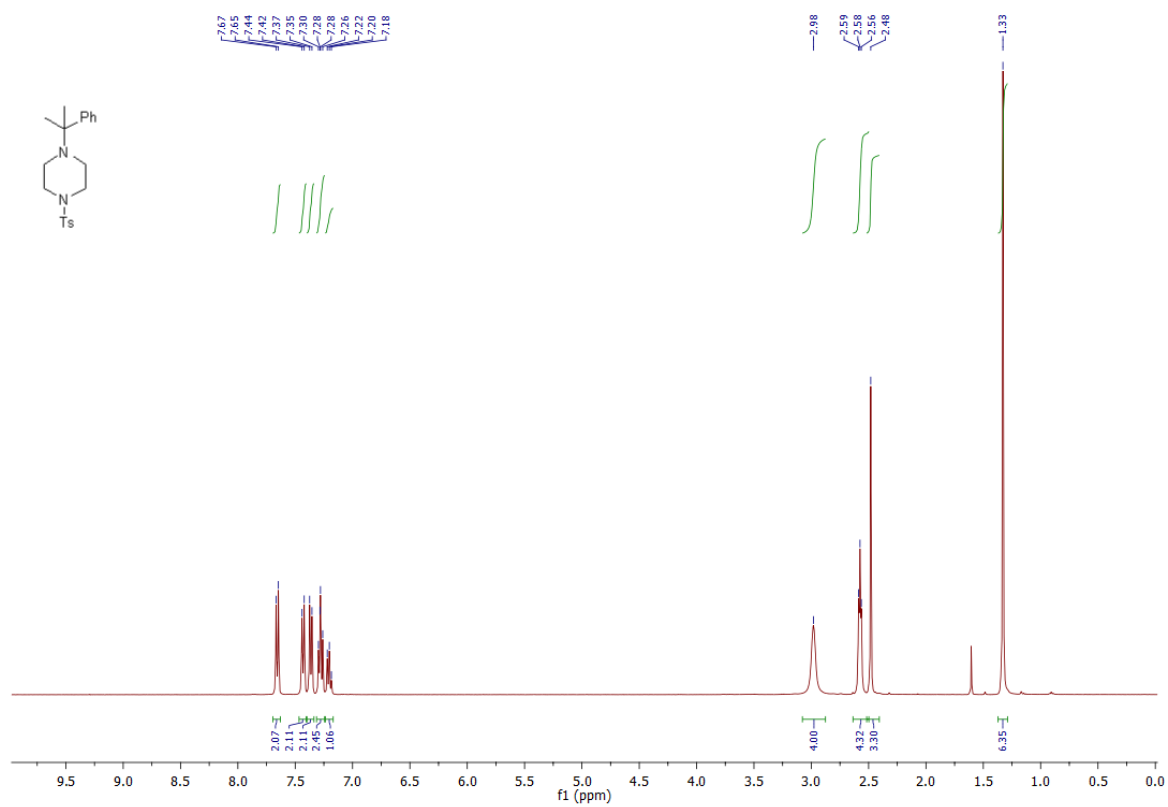

<sup>1</sup>H NMR spectrum (CDCl<sub>3</sub>, 400 MHz) of **e**:

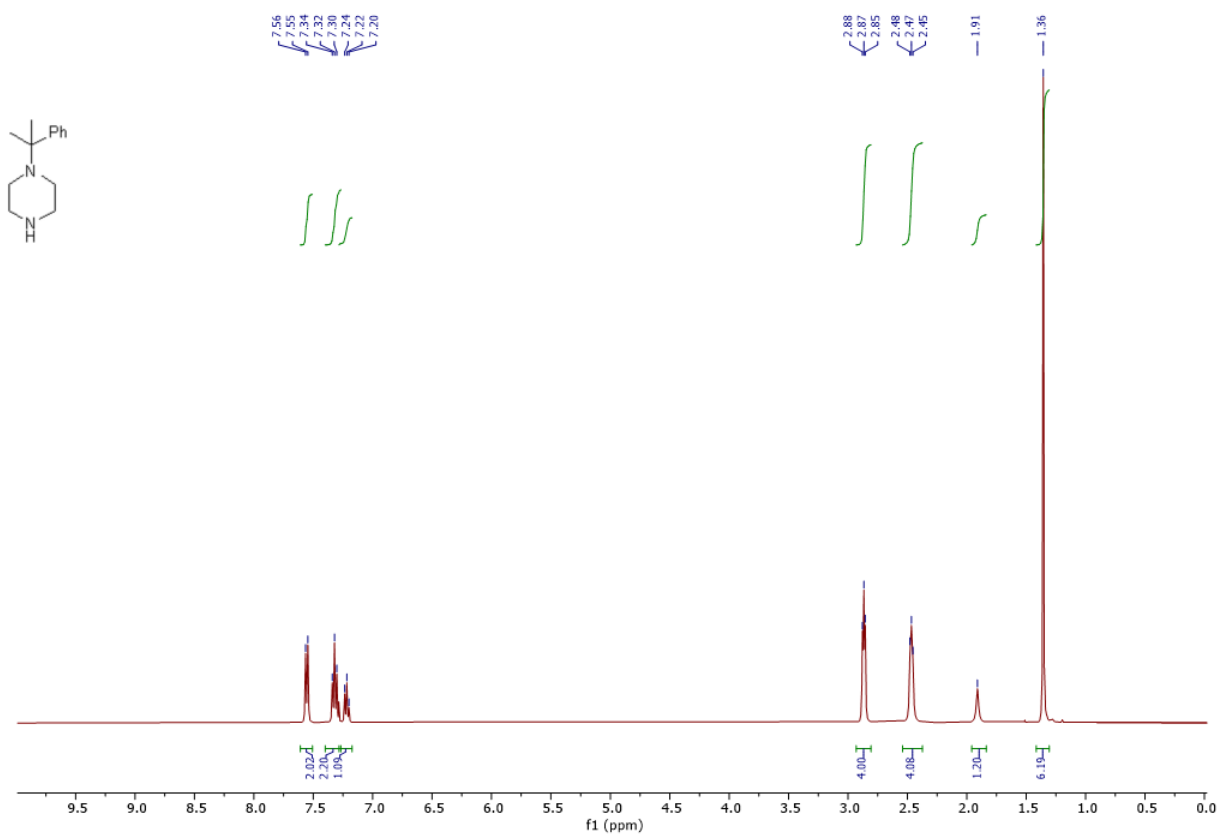

$^1\text{H}$  NMR spectrum ( $\text{CDCl}_3$ , 400 MHz) of **f**:

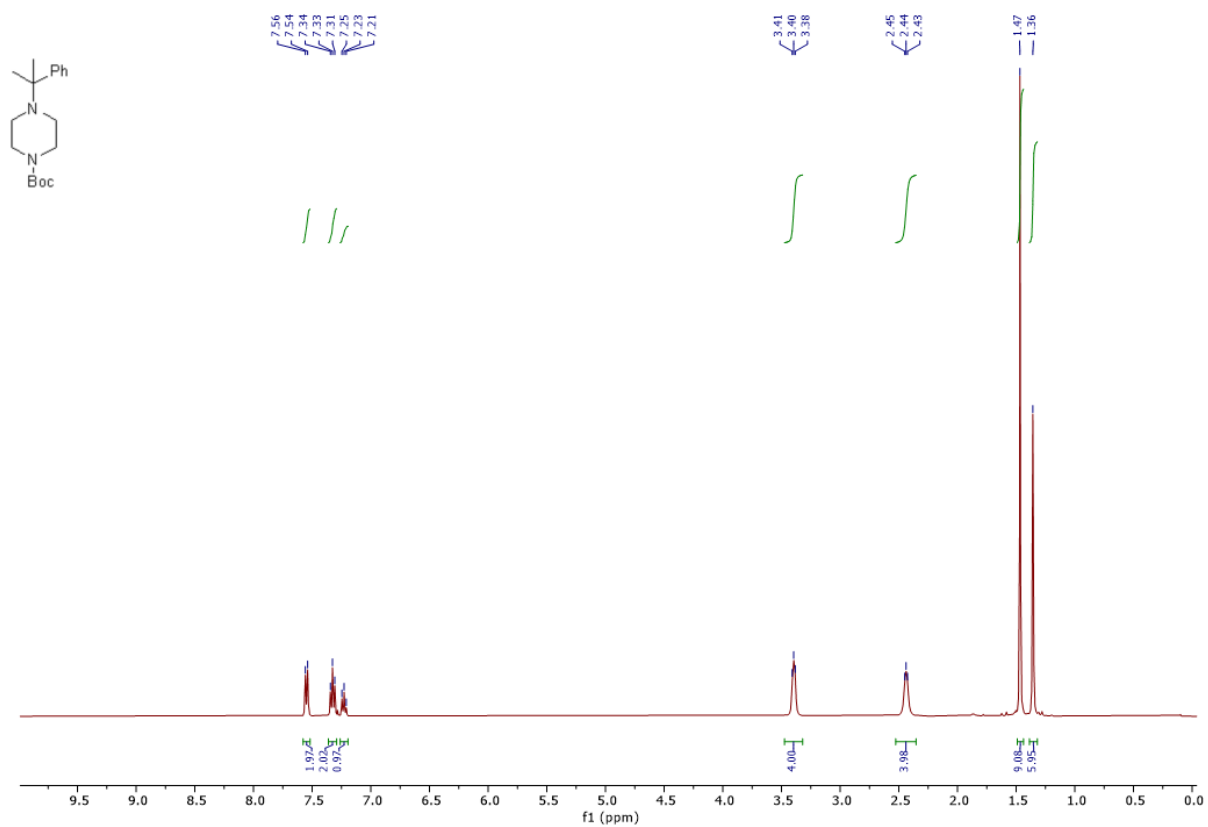

$^{13}\text{C}$   $\{^1\text{H}\}$  NMR spectrum ( $\text{CDCl}_3$ , 100 MHz) of **f**:

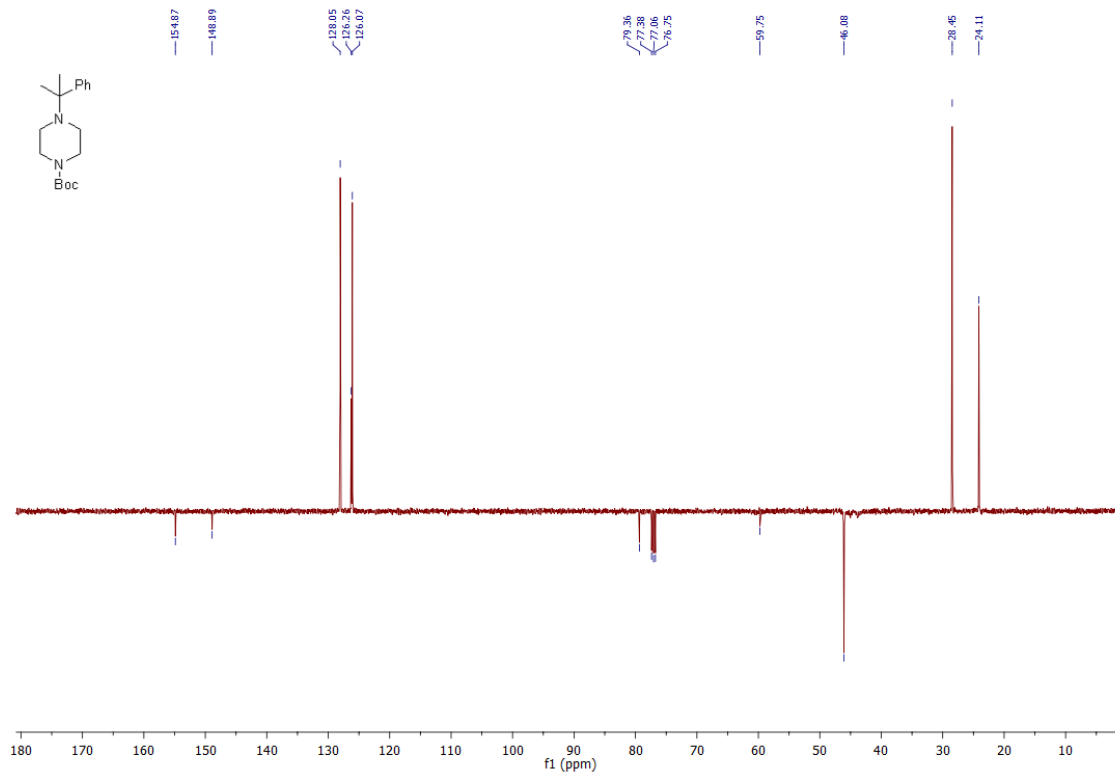

<sup>1</sup>H NMR spectrum (CDCl<sub>3</sub>, 400 MHz) of **1**:

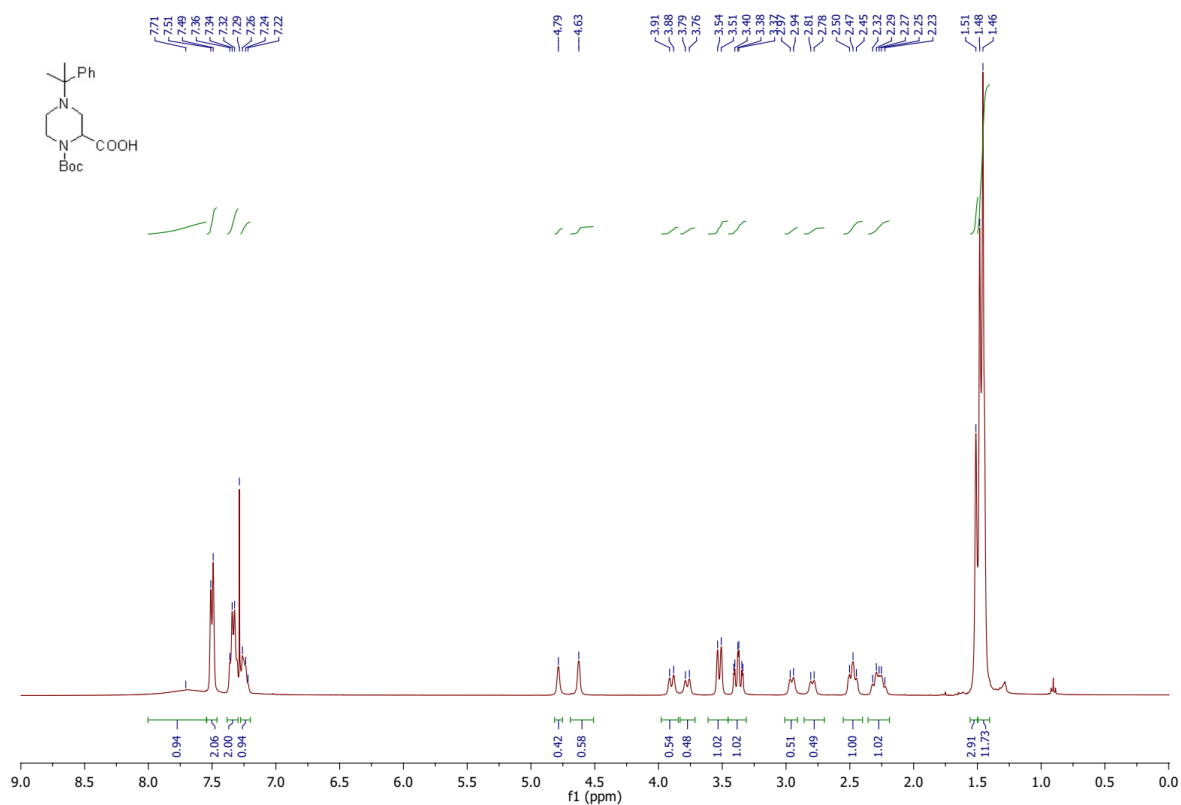

<sup>13</sup>C {<sup>1</sup>H} NMR spectrum (CDCl<sub>3</sub>, 100 MHz) of **1**:

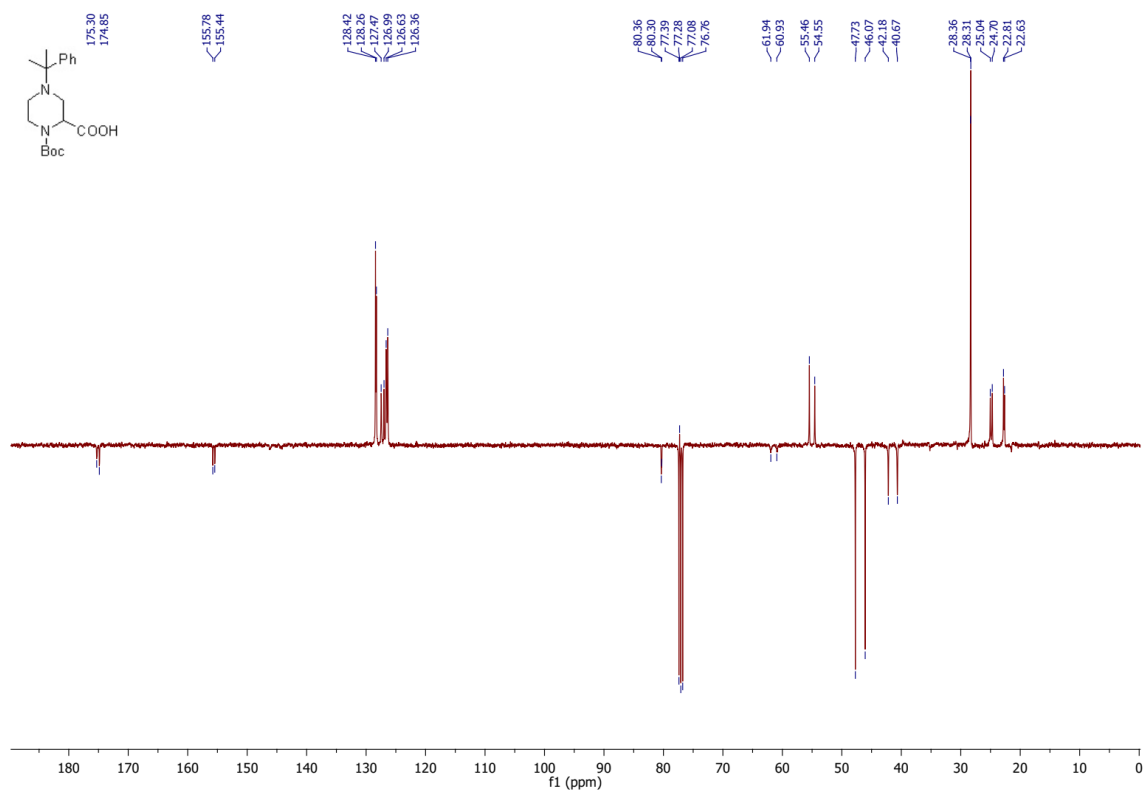

<sup>1</sup>H NMR spectrum (CDCl<sub>3</sub>, 400 MHz) of **A**:

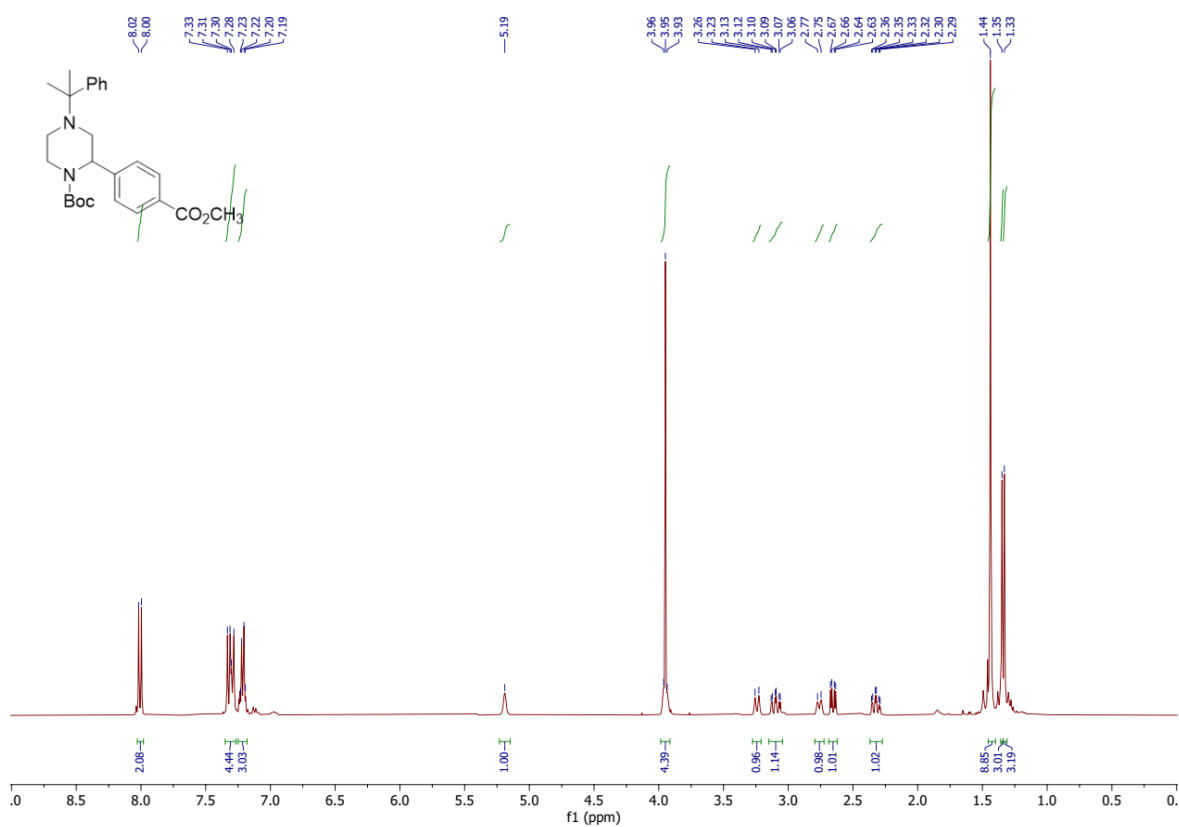

<sup>13</sup>C {<sup>1</sup>H} NMR spectrum (CDCl<sub>3</sub>, 100 MHz) of **A**:

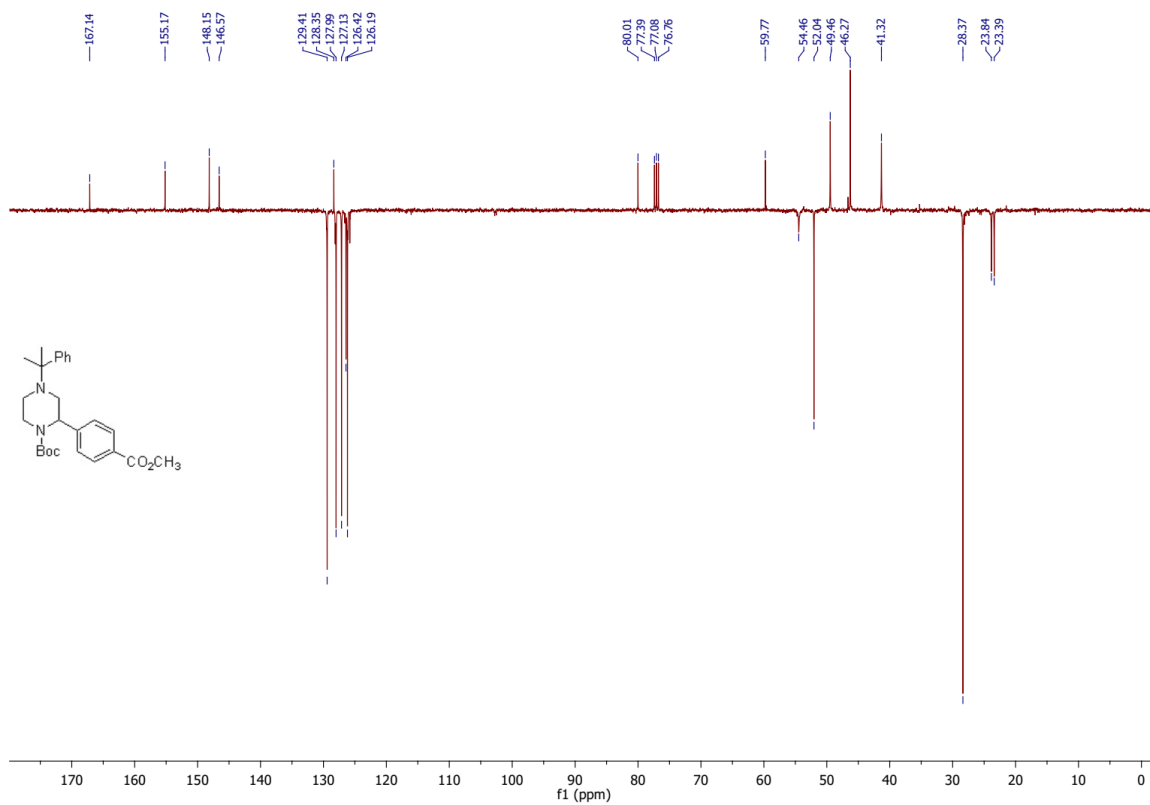

<sup>1</sup>H NMR spectrum (CDCl<sub>3</sub>, 400 MHz) of **2a**:

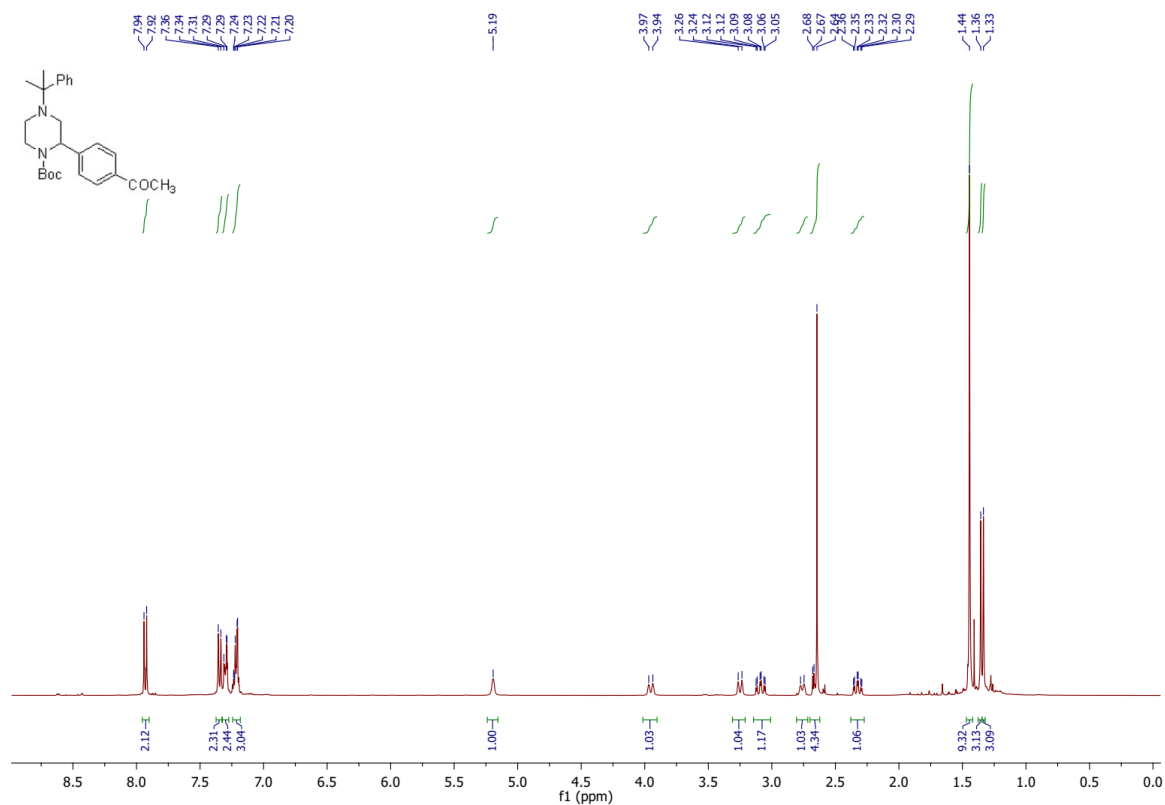

<sup>13</sup>C {<sup>1</sup>H} NMR spectrum (CDCl<sub>3</sub>, 100 MHz) of **2a**:

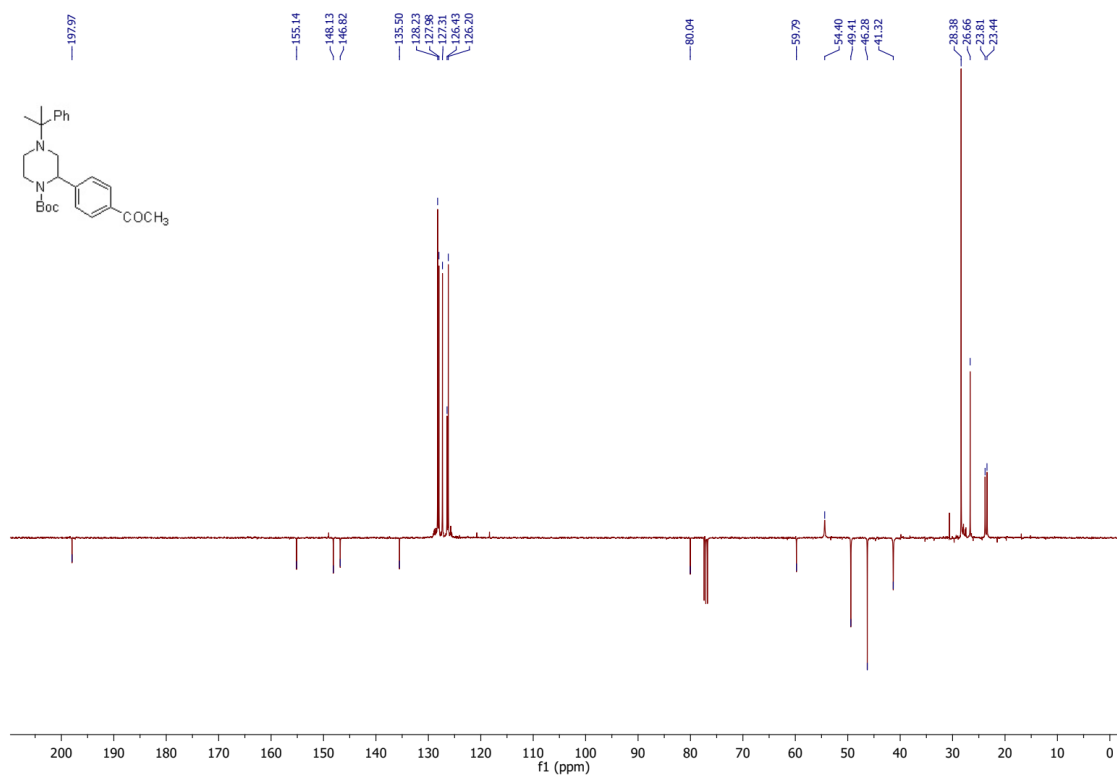

$^1\text{H}$  NMR spectrum ( $\text{CDCl}_3$ , 400 MHz) of **2b**:

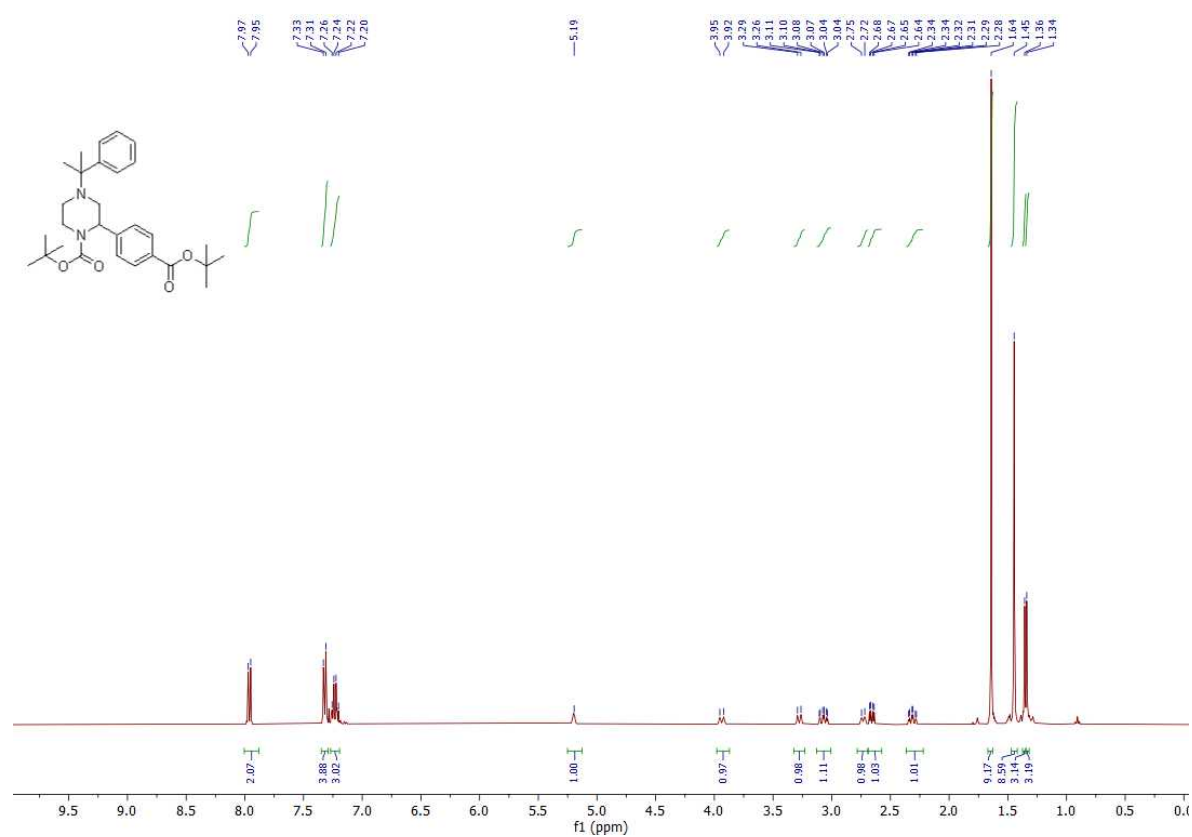

$^{13}\text{C}$   $\{^1\text{H}\}$  NMR spectrum ( $\text{CDCl}_3$ , 100 MHz) of **2b**:

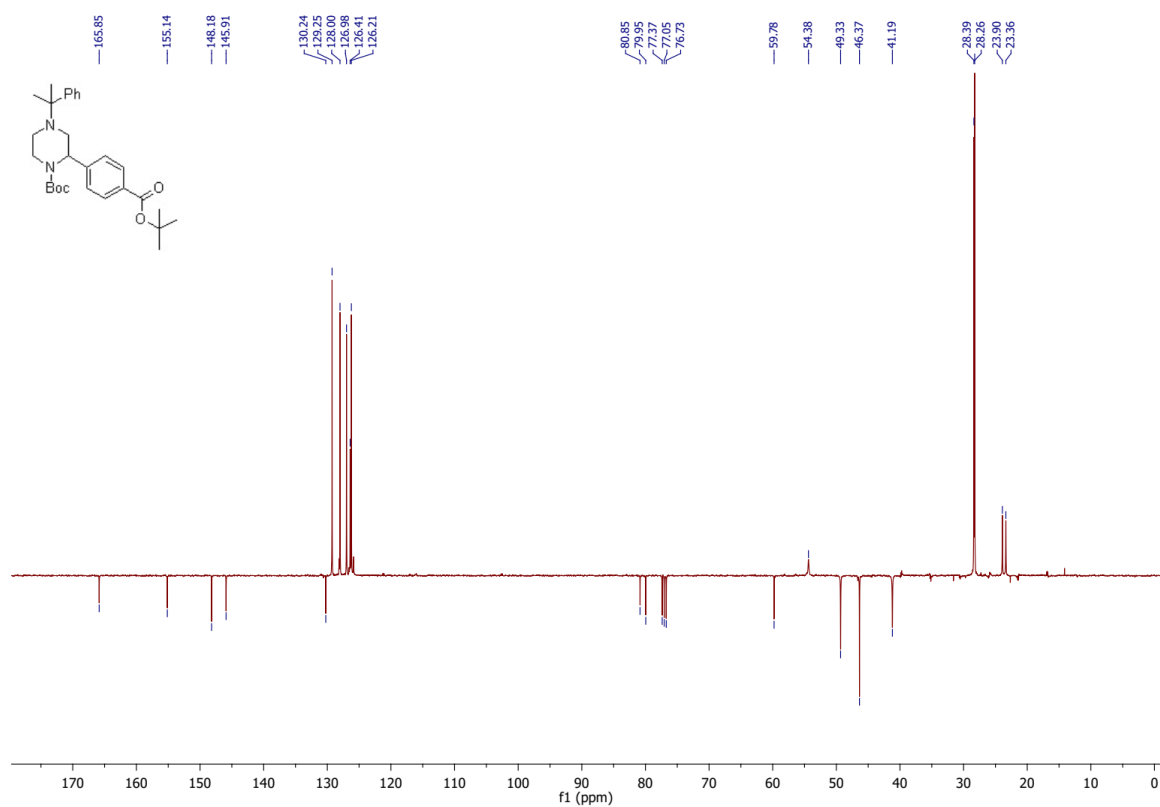



$^1\text{H}$  NMR spectrum ( $\text{CDCl}_3$ , 400 MHz) of **2c**:

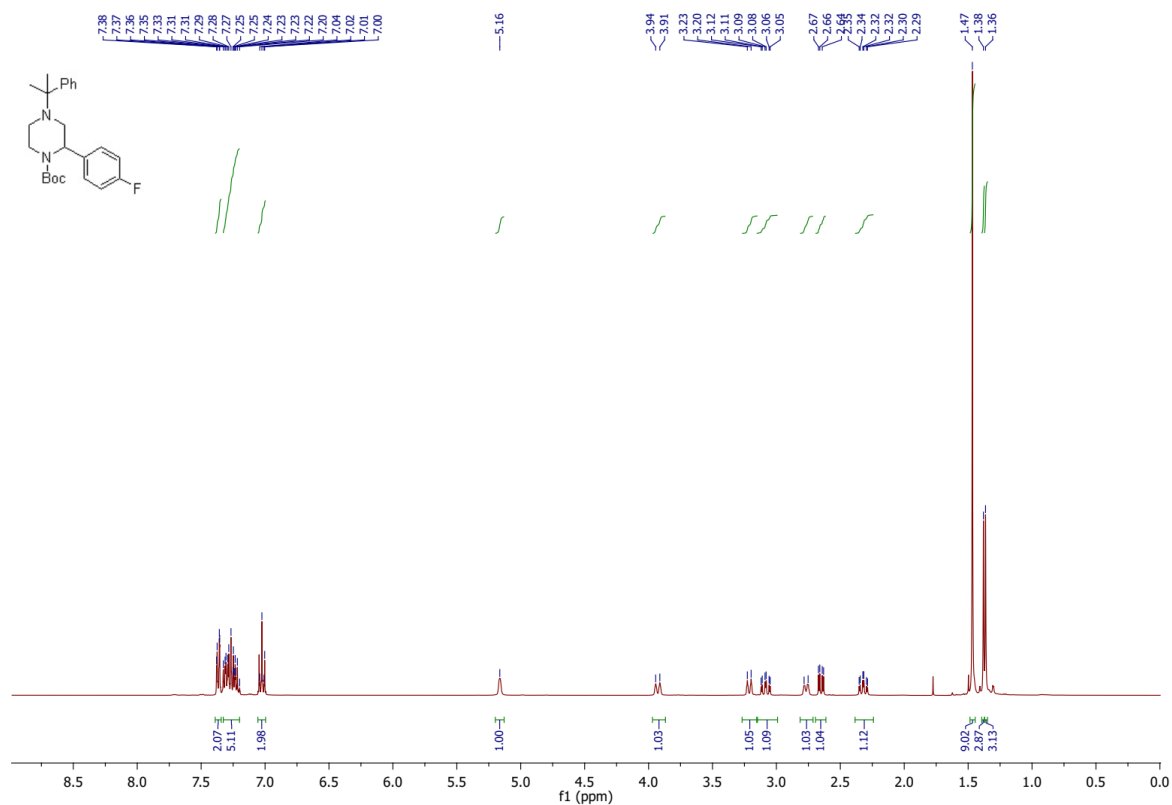

$^{13}\text{C}$   $\{^1\text{H}\}$  NMR spectrum ( $\text{CDCl}_3$ , 100 MHz) of **2c**:

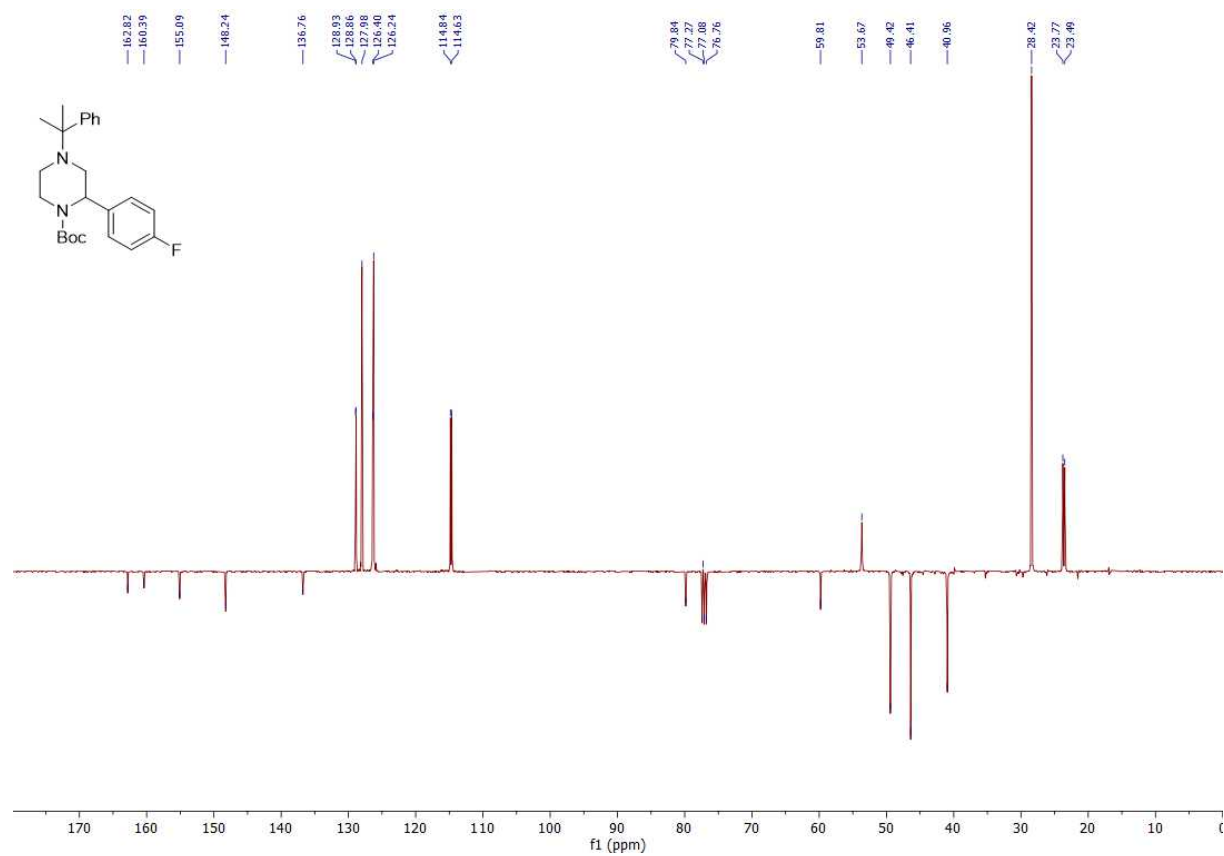

$^{19}\text{F}$  NMR spectrum ( $\text{CDCl}_3$ , 377 MHz) of **2c**:

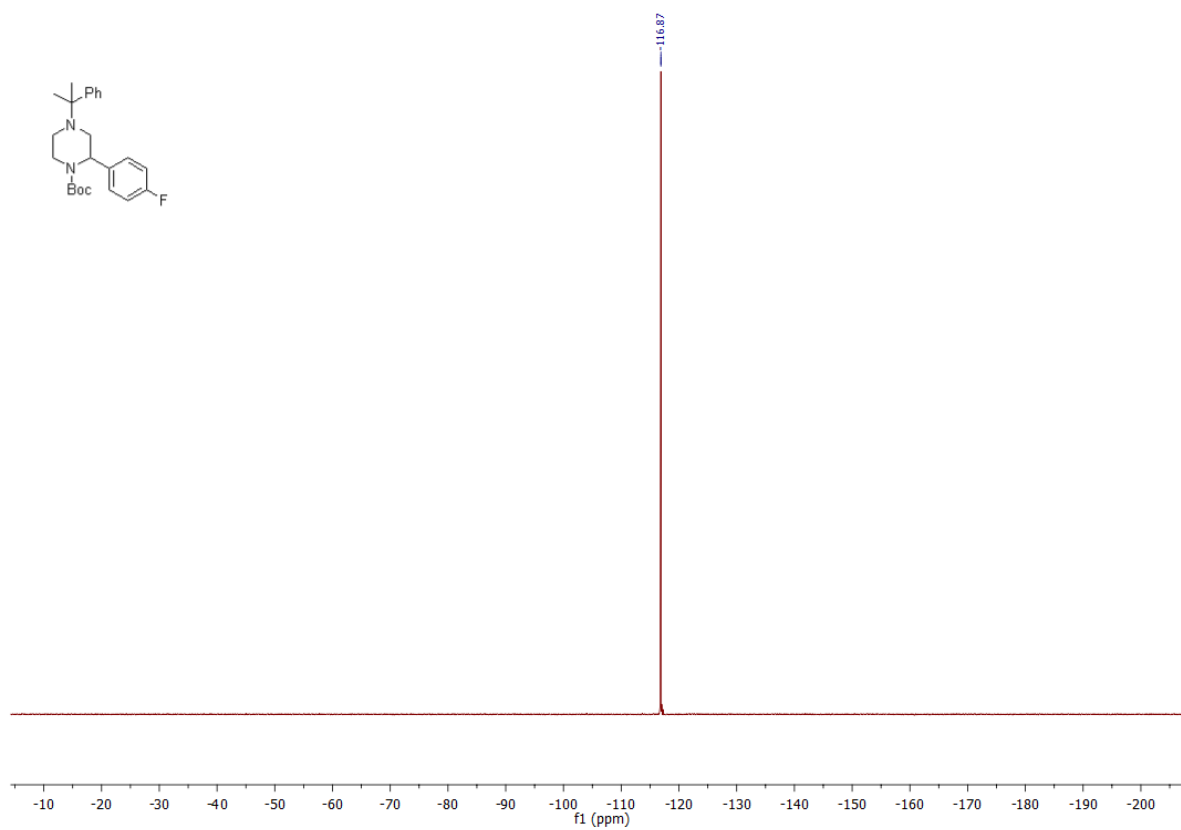

$^1\text{H}$  NMR spectrum ( $\text{CDCl}_3$ , 400 MHz) of **2d**:

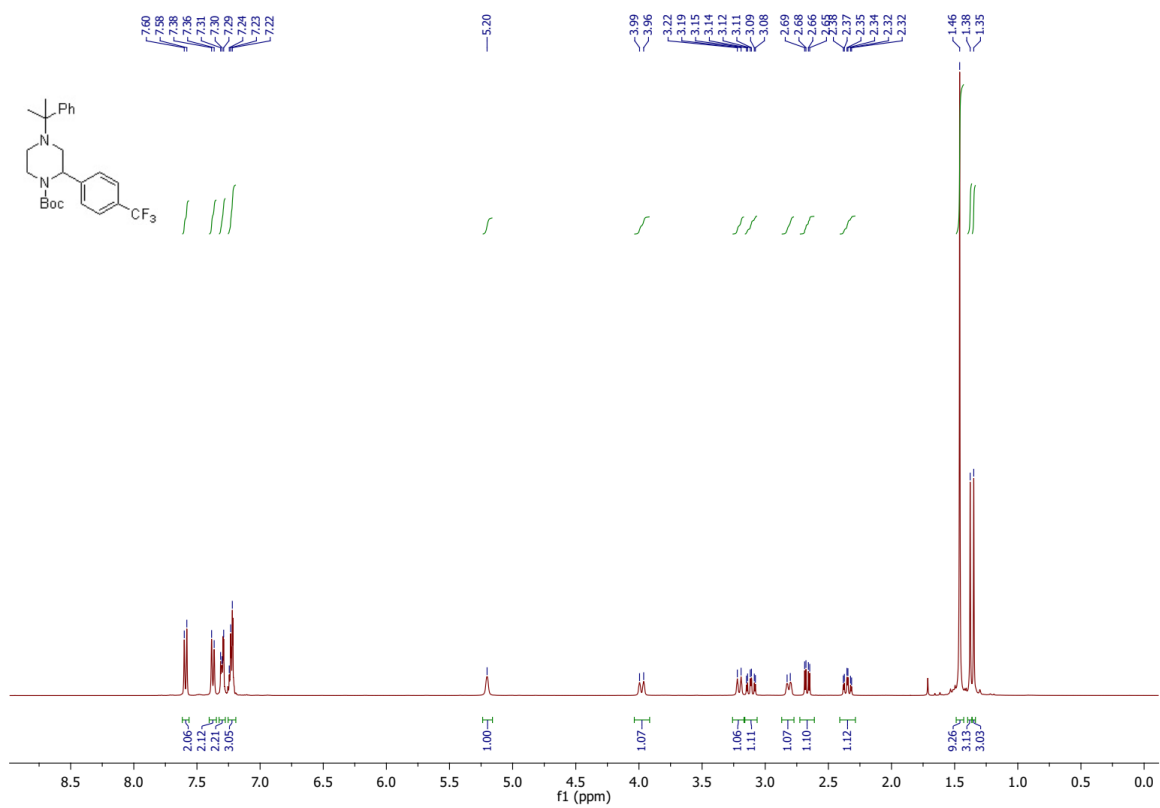

$^{13}\text{C}$   $\{^1\text{H}\}$  NMR spectrum ( $\text{CDCl}_3$ , 100 MHz) of **2d**:

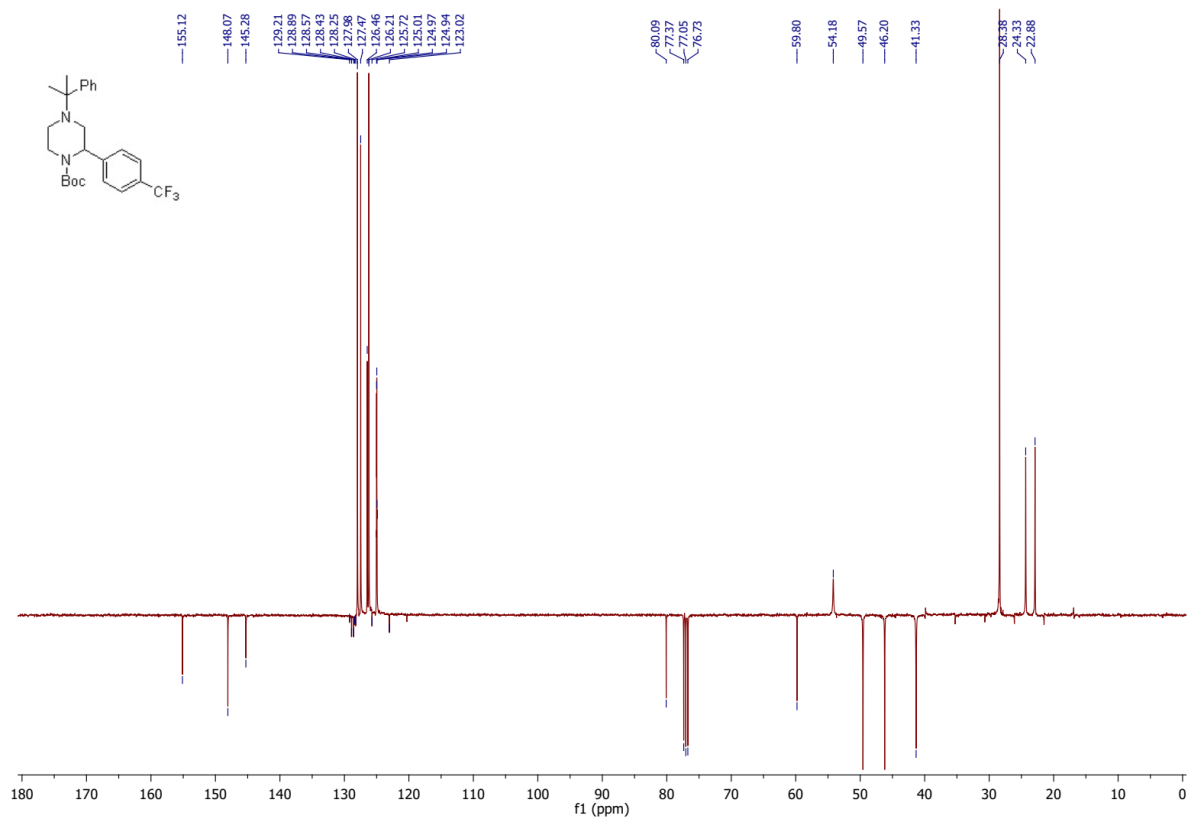

$^{19}\text{F}$  NMR spectrum ( $\text{CDCl}_3$ , 377 MHz) of **2d**:

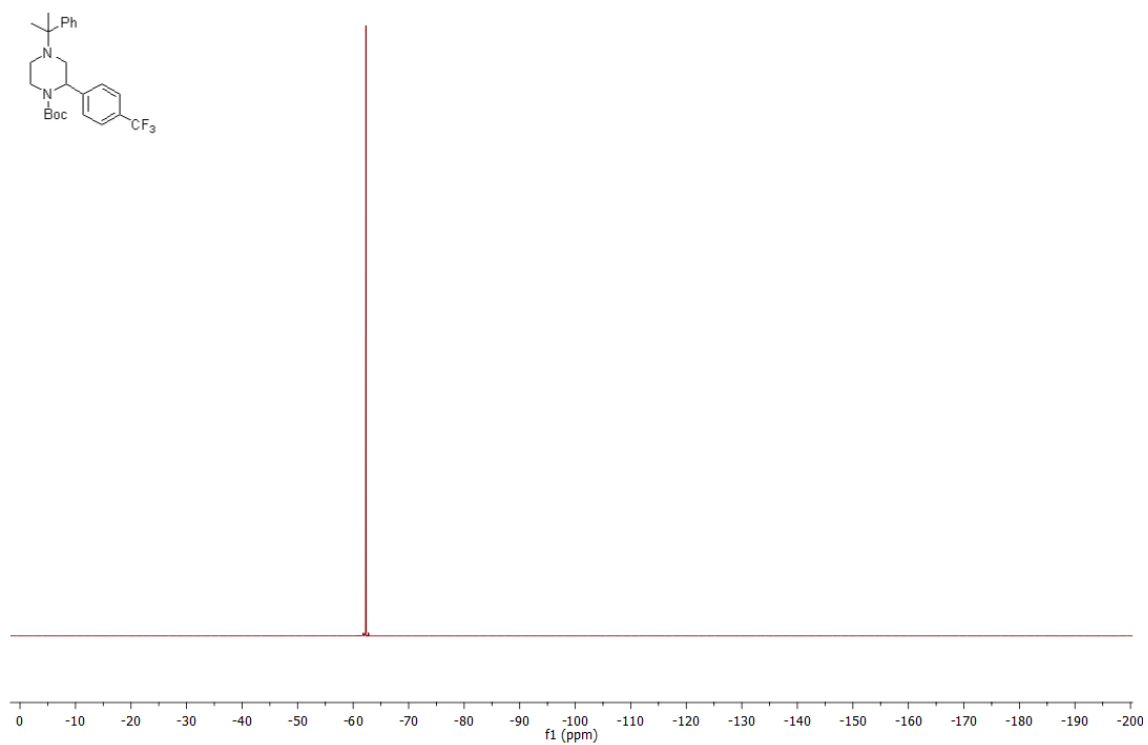

<sup>1</sup>H NMR spectrum (CDCl<sub>3</sub>, 400 MHz) of **2e**:

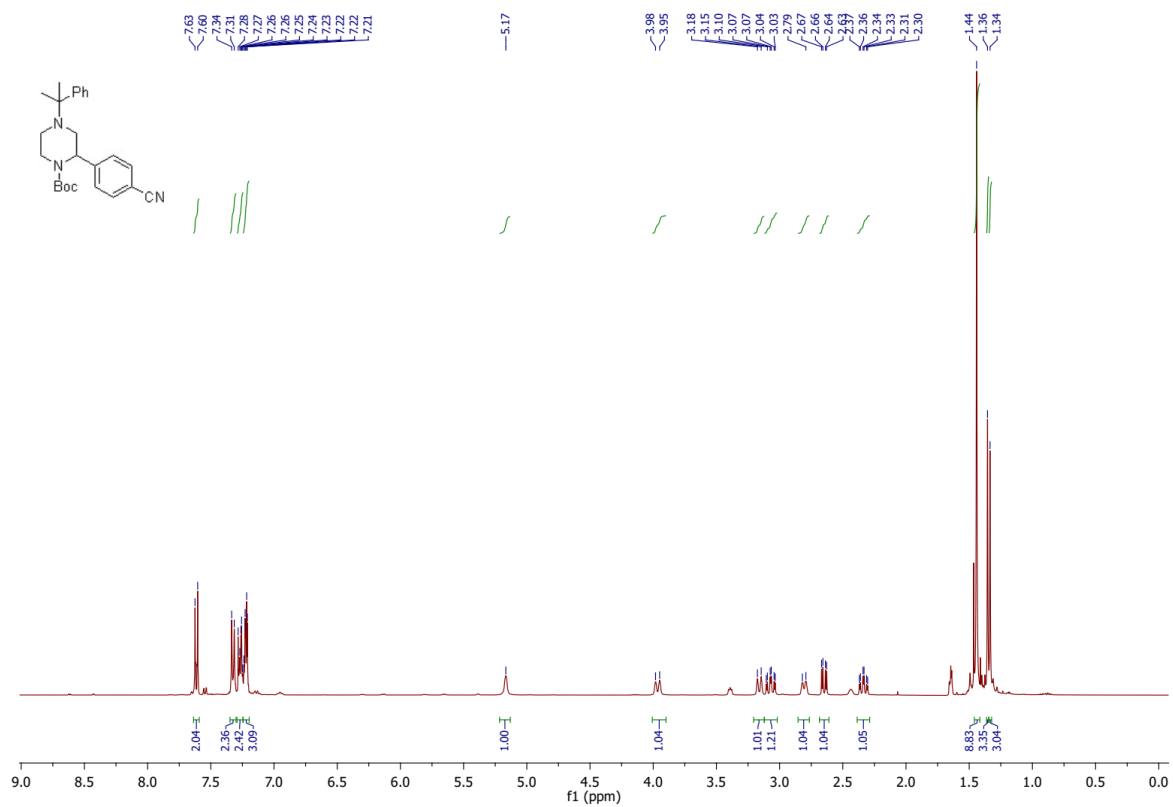

<sup>13</sup>C {<sup>1</sup>H} NMR spectrum (CDCl<sub>3</sub>, 100 MHz) of **2e**:

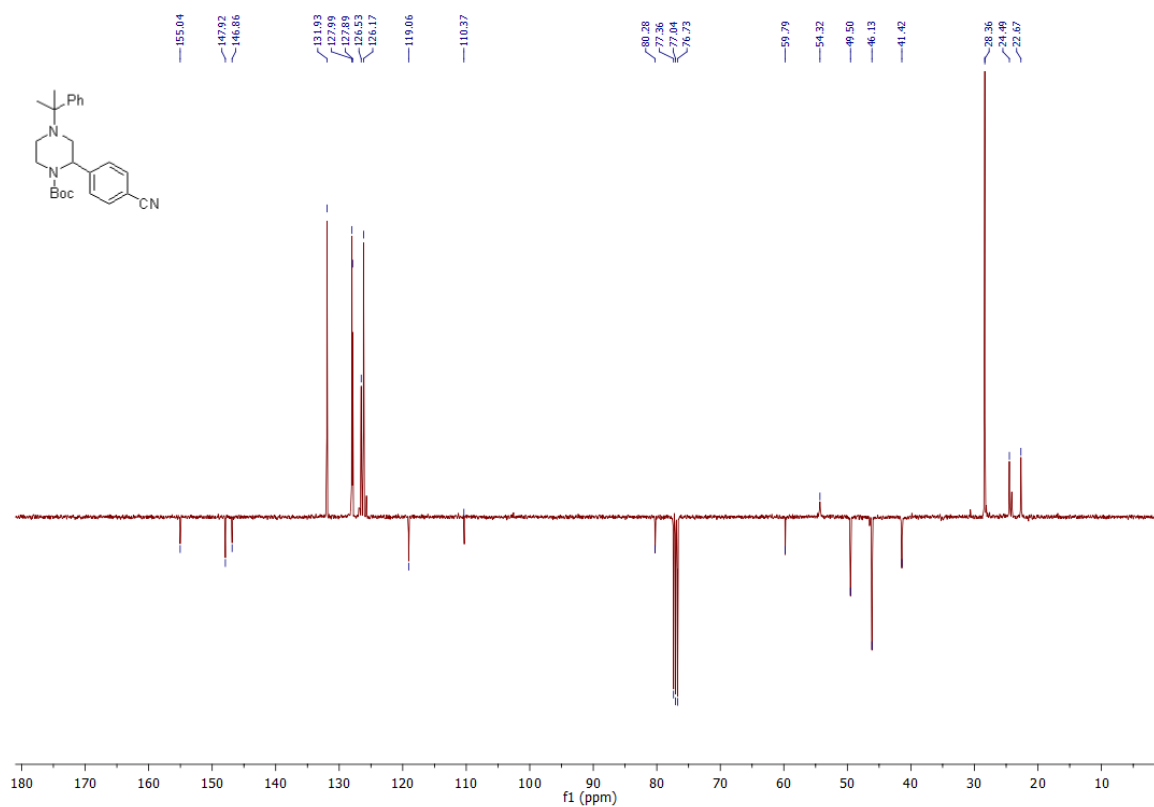

<sup>1</sup>H NMR spectrum (CDCl<sub>3</sub>, 400 MHz) of **2f**:

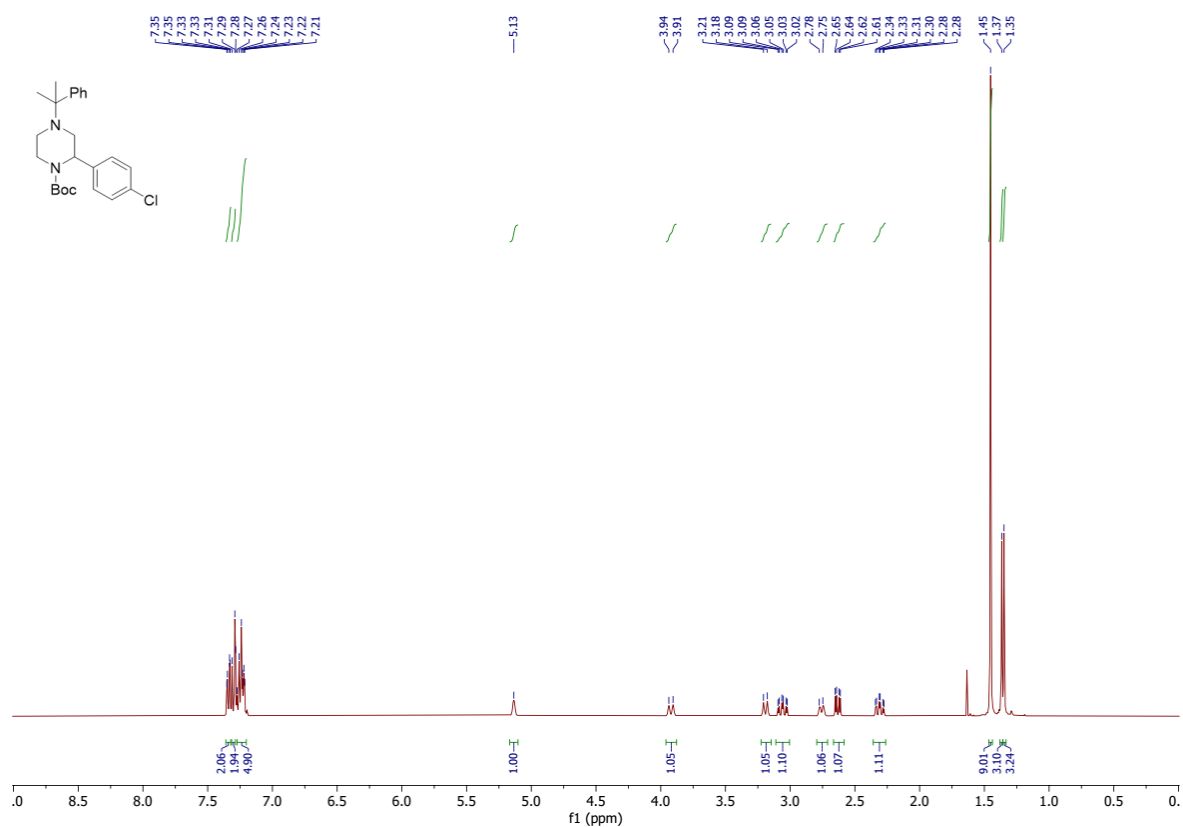

<sup>13</sup>C {<sup>1</sup>H} NMR spectrum (CDCl<sub>3</sub>, 100 MHz) of **2f**:

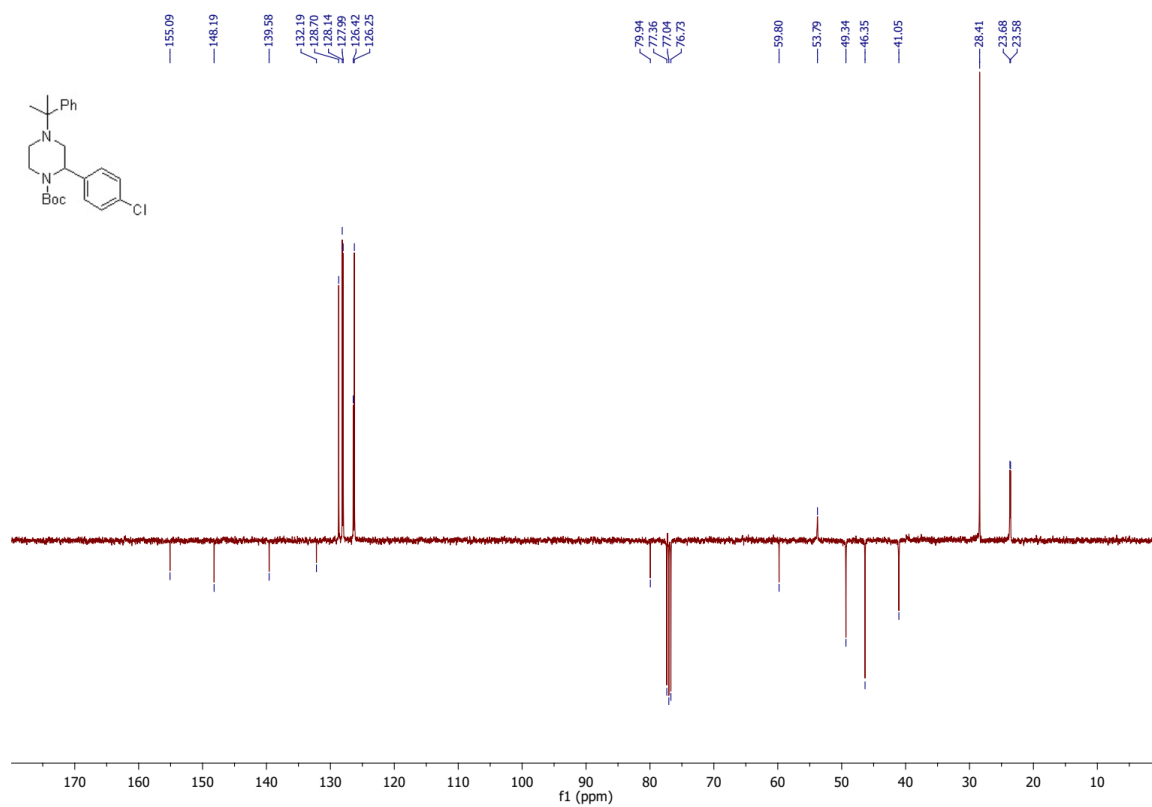

$^1\text{H}$  NMR spectrum ( $\text{CDCl}_3$ , 400 MHz) of **2g**:

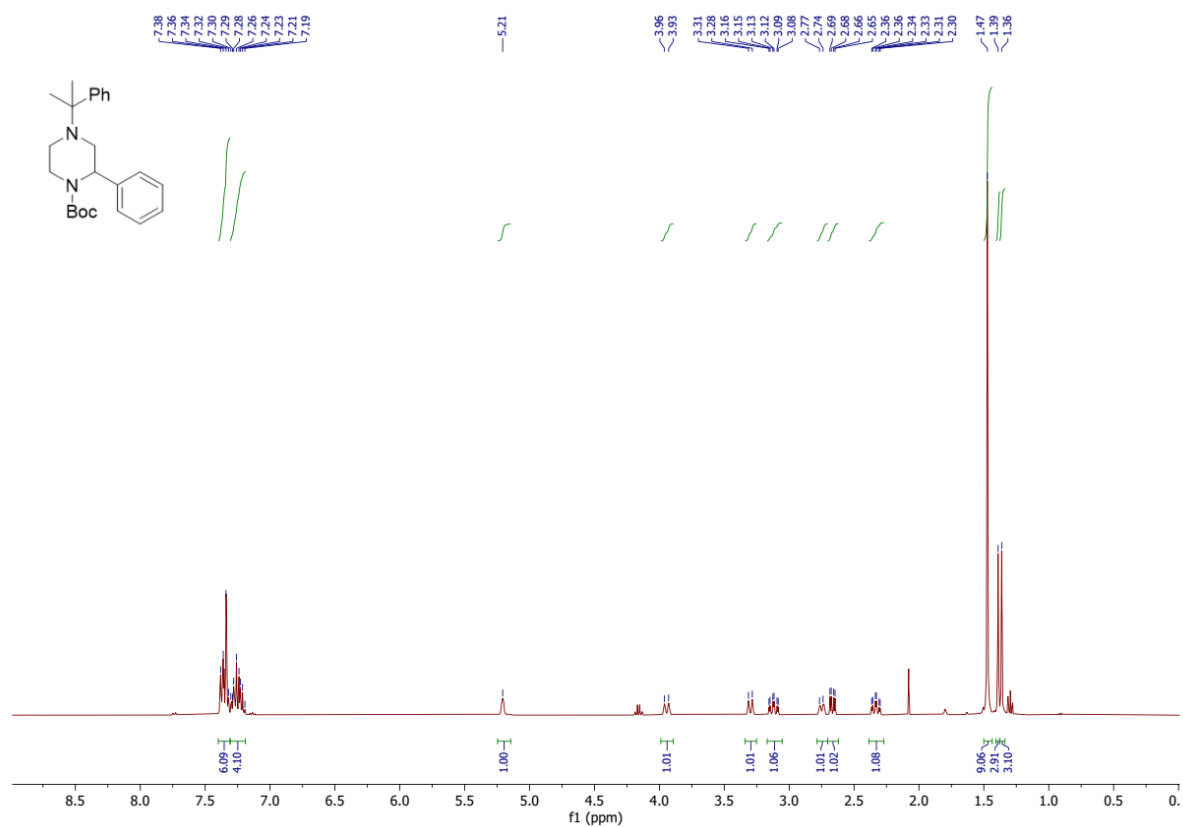

$^{13}\text{C}$   $\{^1\text{H}\}$  NMR spectrum ( $\text{CDCl}_3$ , 100 MHz) of **2g**:

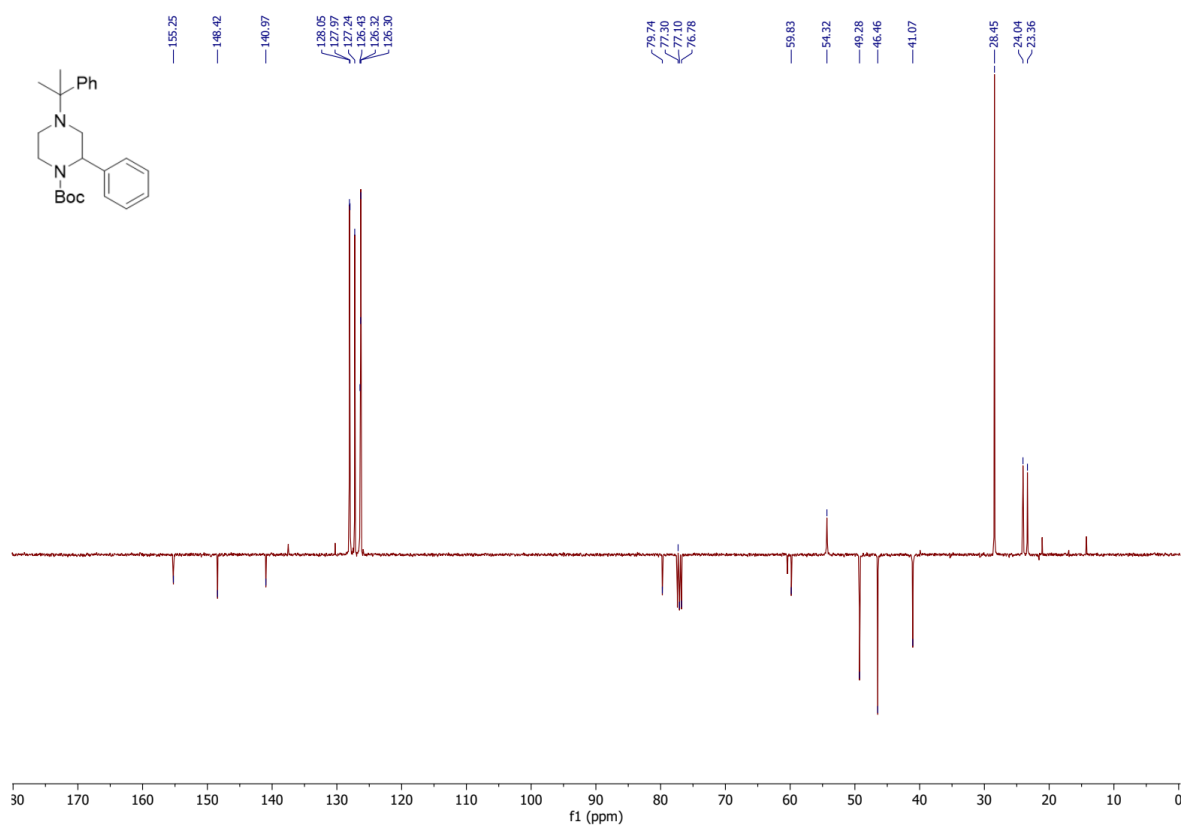

<sup>1</sup>H NMR spectrum (CDCl<sub>3</sub>, 400 MHz) of **2h**:

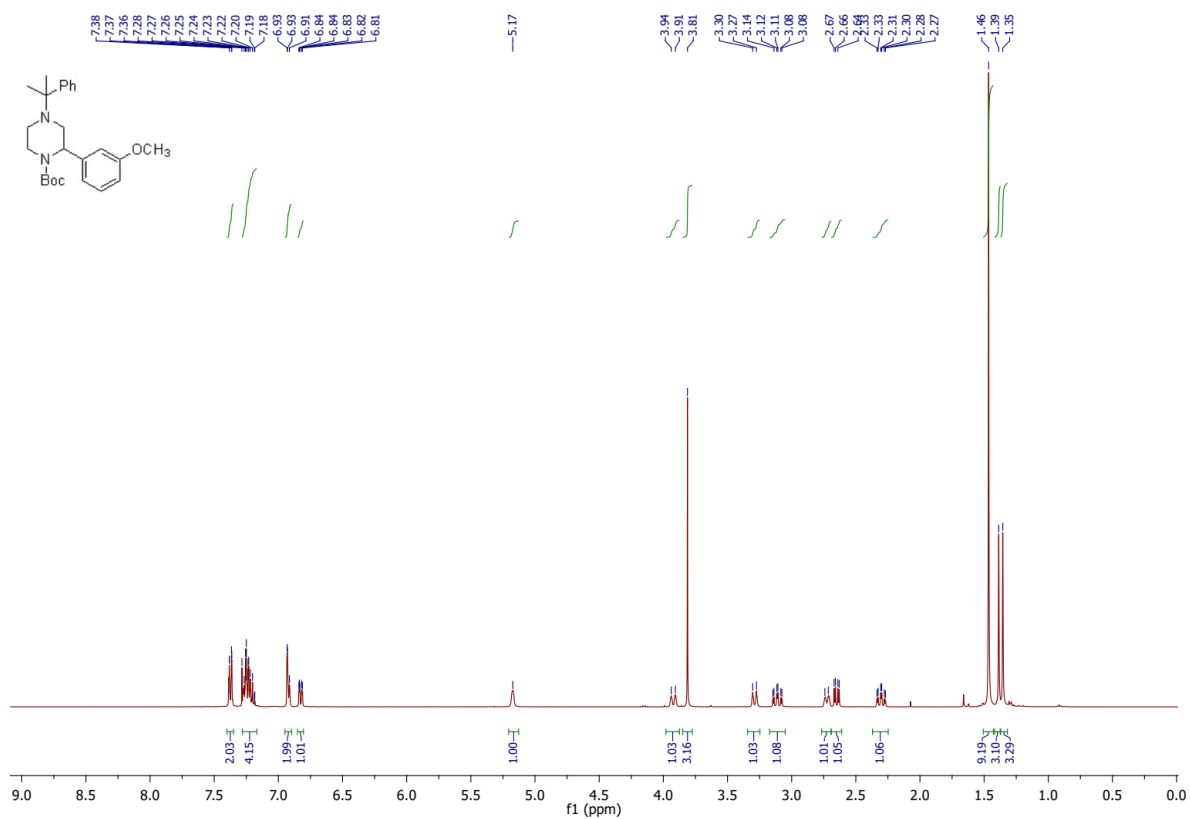

<sup>13</sup>C {<sup>1</sup>H} NMR spectrum (CDCl<sub>3</sub>, 100 MHz) of **2h**:

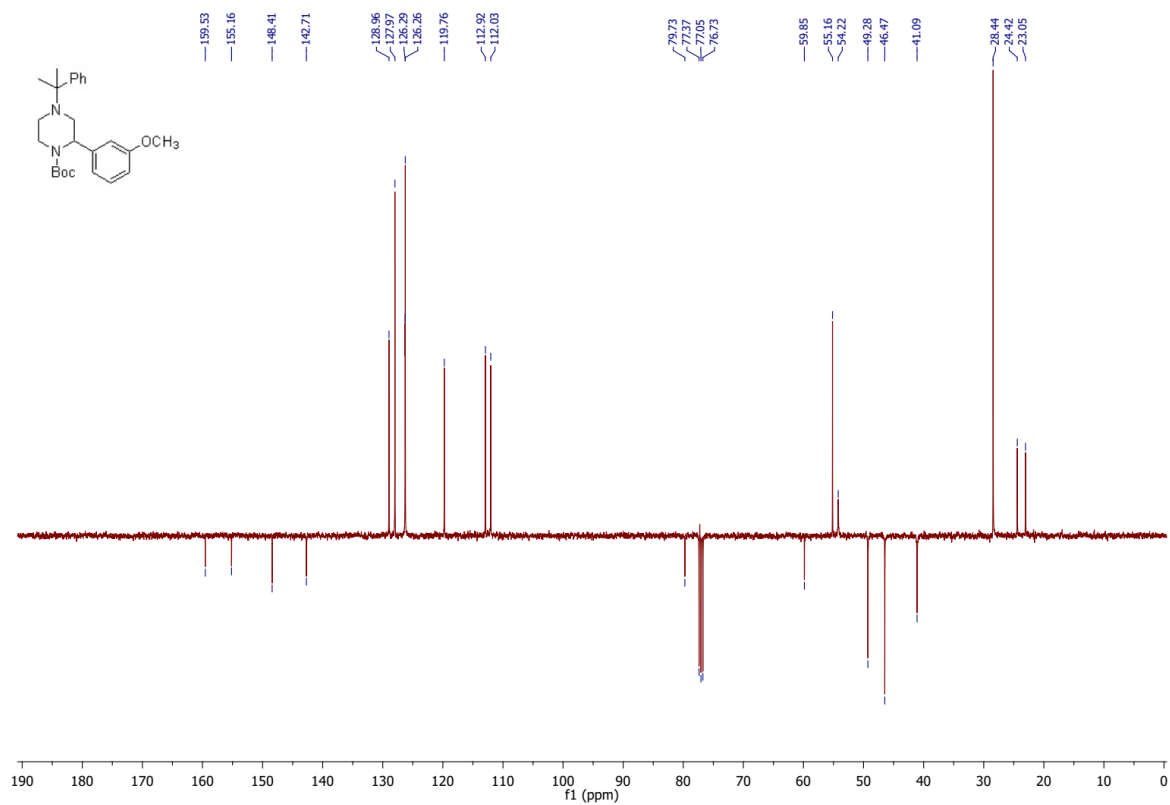

<sup>1</sup>H NMR spectrum (CDCl<sub>3</sub>, 400 MHz) of **2i**:

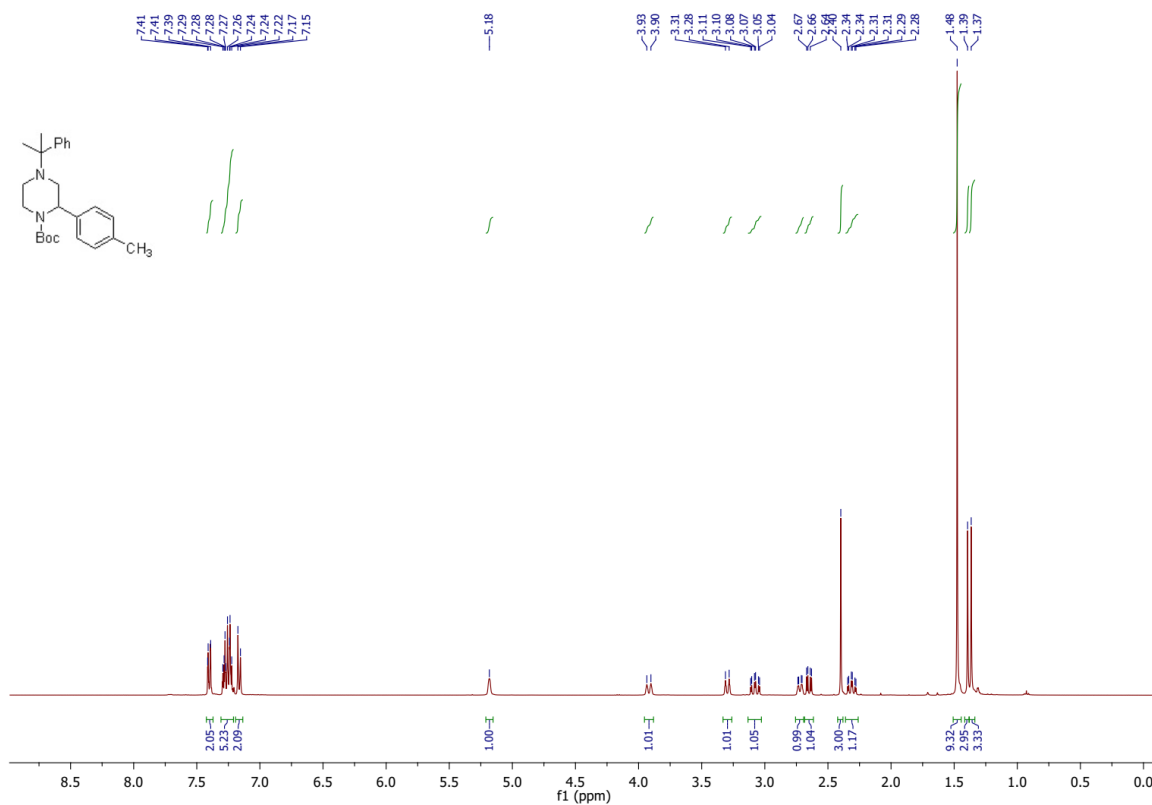

<sup>13</sup>C {<sup>1</sup>H} NMR spectrum (CDCl<sub>3</sub>, 100 MHz) of **2i**:

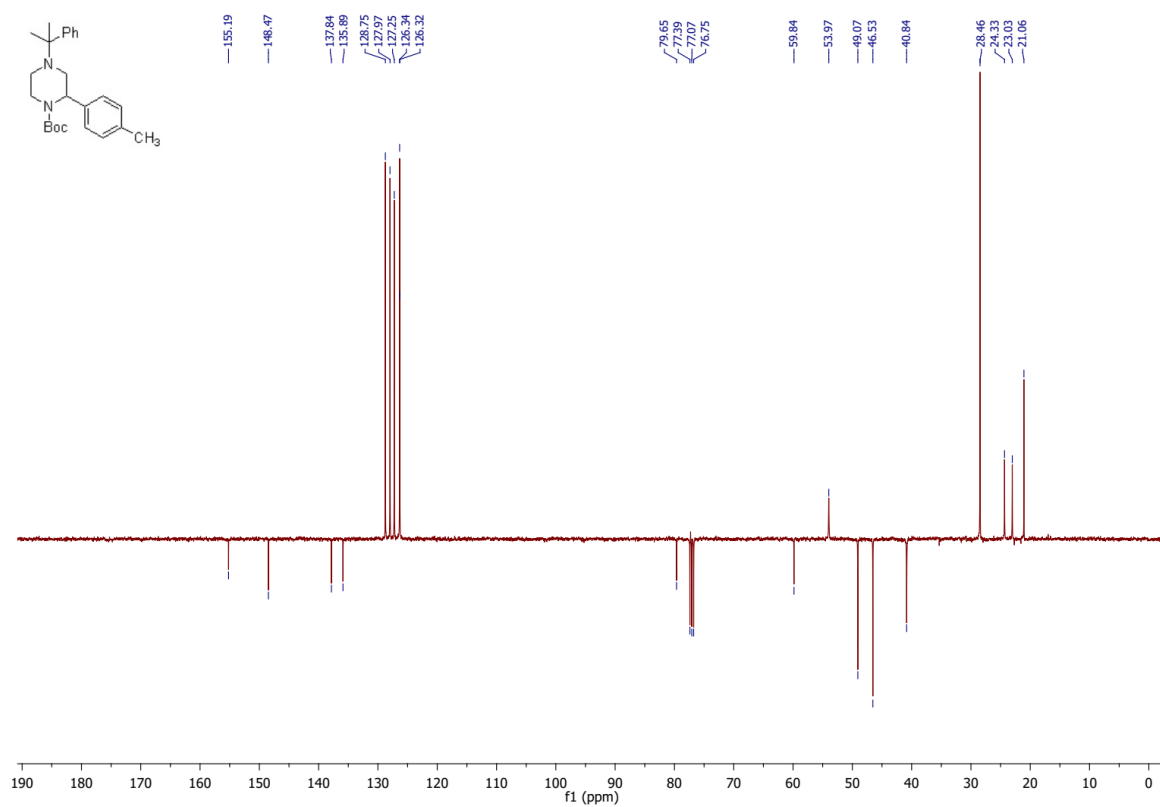



<sup>1</sup>H NMR spectrum (CDCl<sub>3</sub>, 400 MHz) of **3b**:

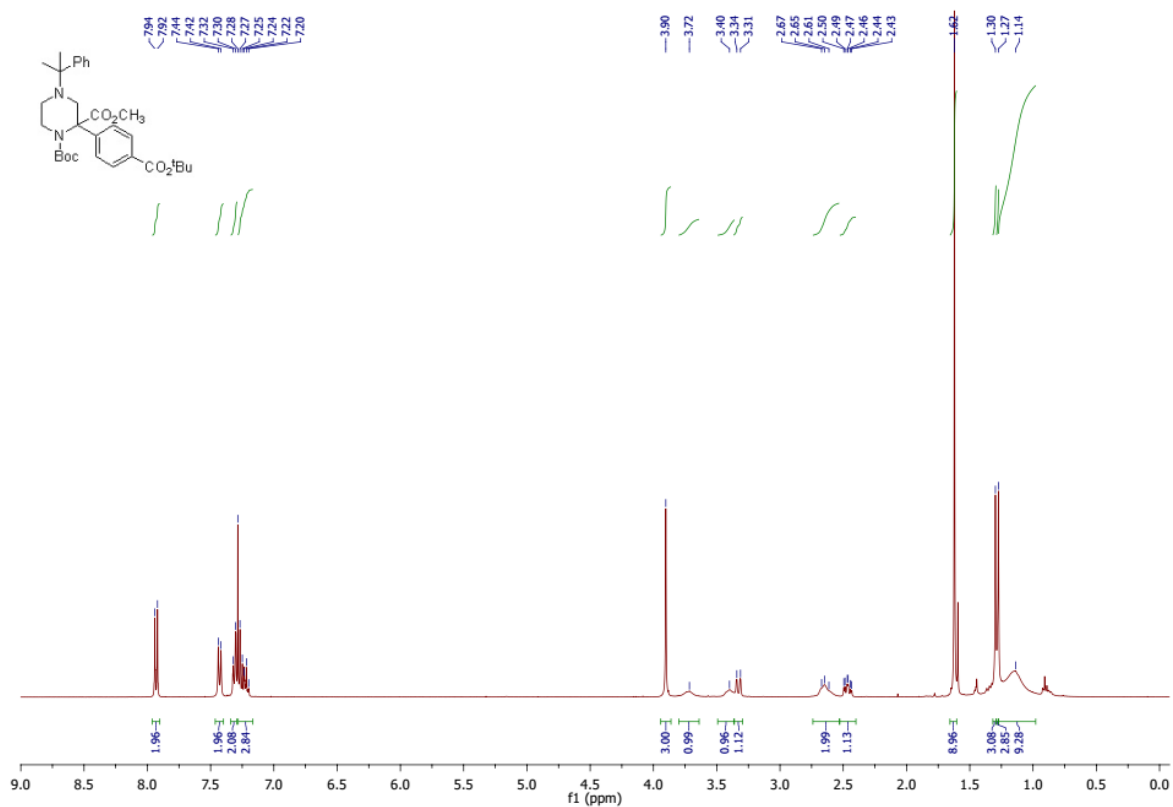

<sup>13</sup>C {<sup>1</sup>H} NMR spectrum (CDCl<sub>3</sub>, 100 MHz) of **3b**:

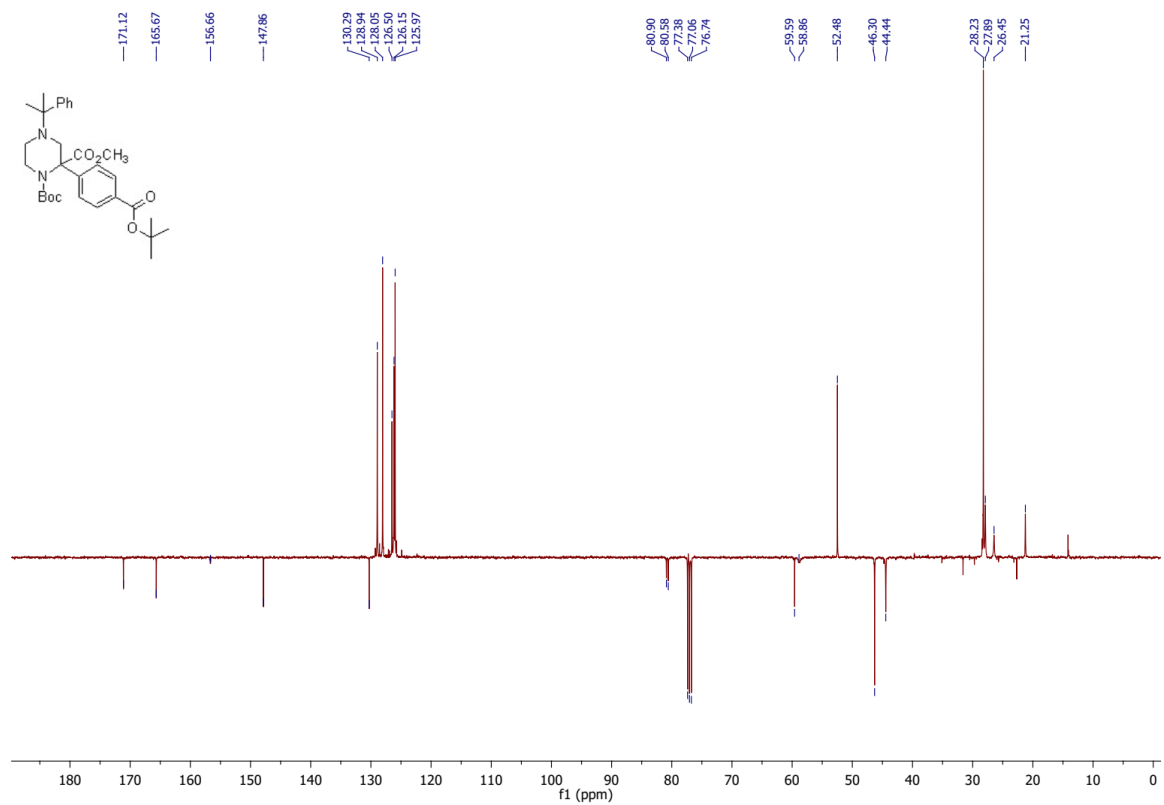

<sup>1</sup>H NMR spectrum (CDCl<sub>3</sub>, 400 MHz) of **3c**:

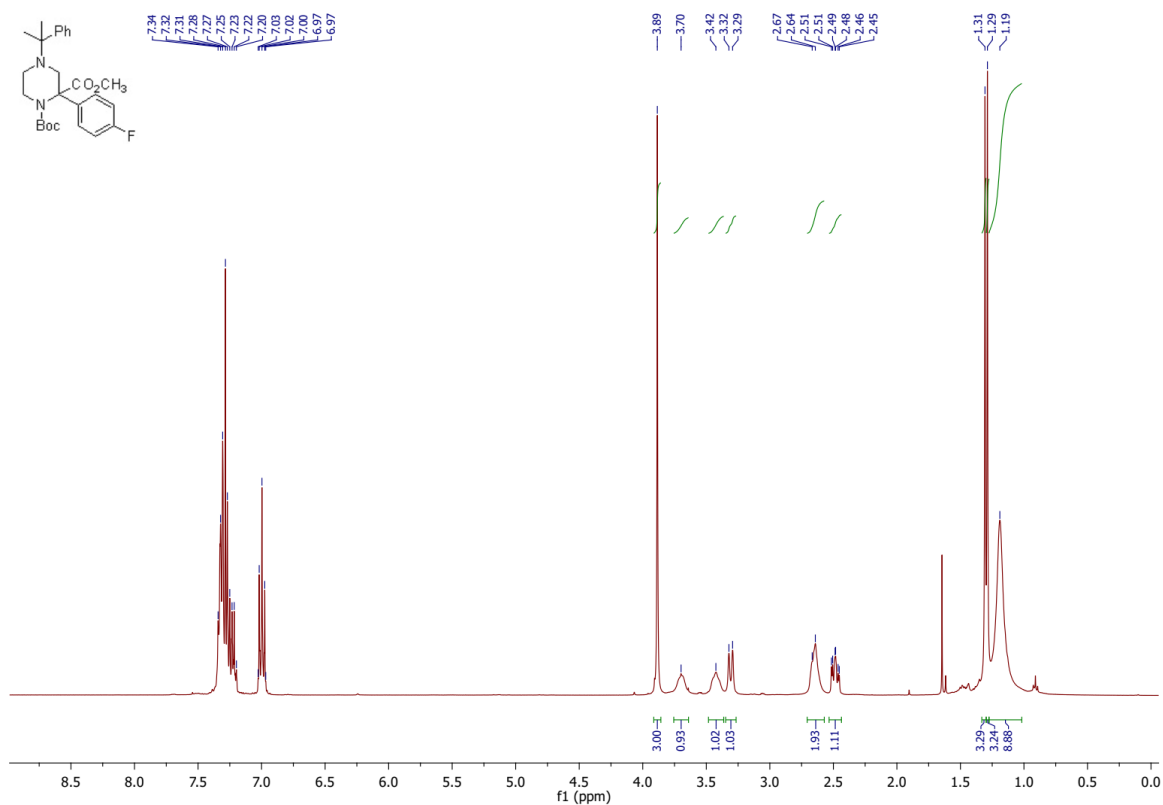

<sup>13</sup>C {<sup>1</sup>H} NMR spectrum (CDCl<sub>3</sub>, 100 MHz) of **3c**:

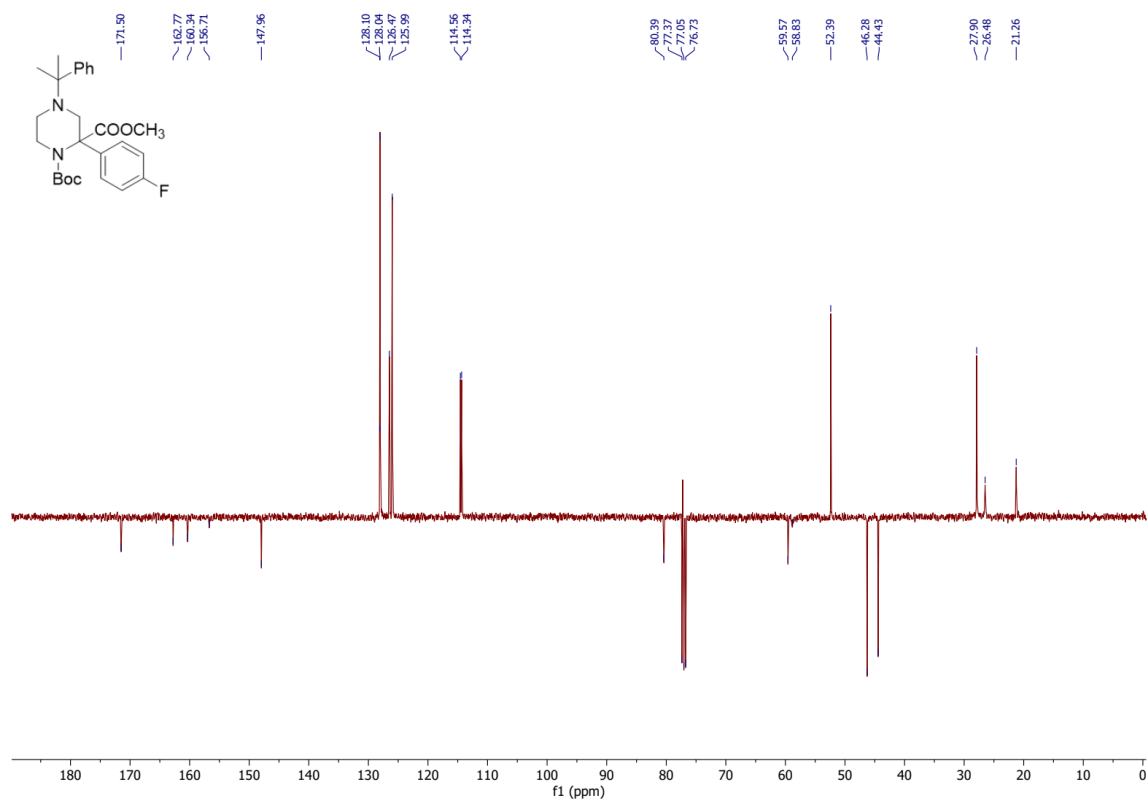

$^{19}\text{F}$  NMR spectrum ( $\text{CDCl}_3$ , 377 MHz) of **3c**:

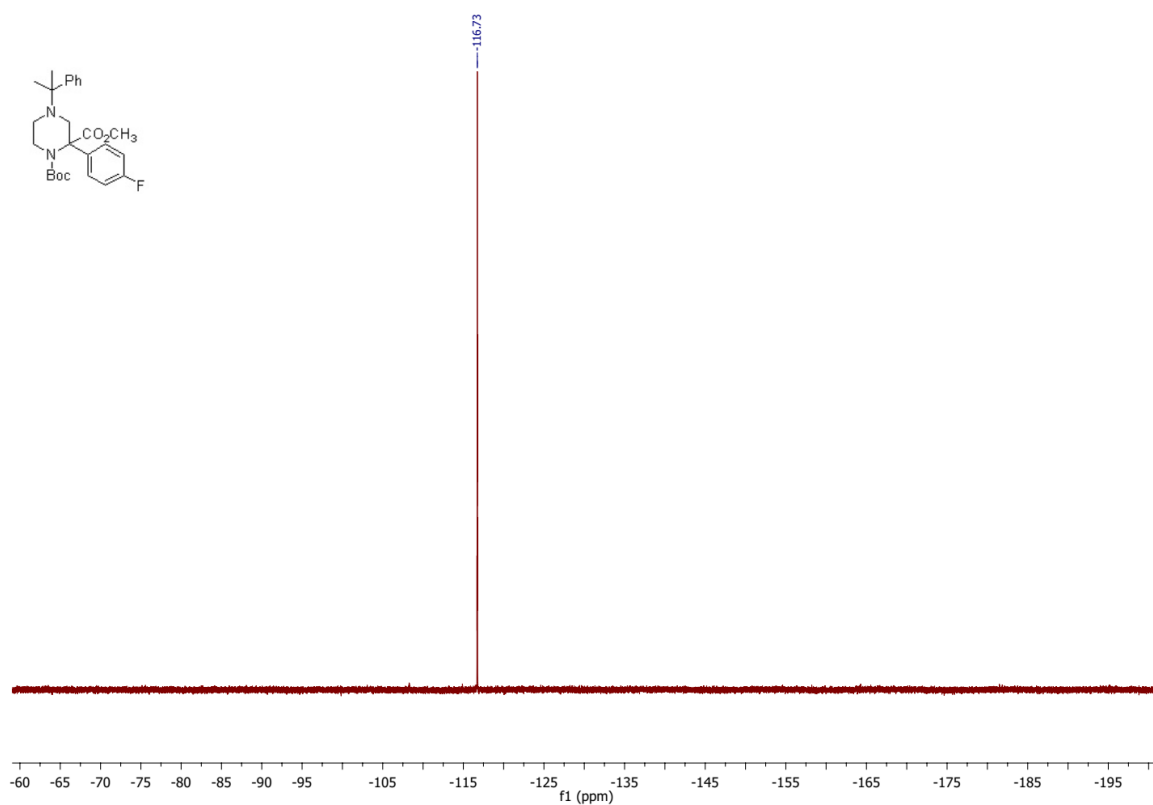

$^1\text{H}$  NMR spectrum ( $\text{CDCl}_3$ , 400 MHz) of **3f**:

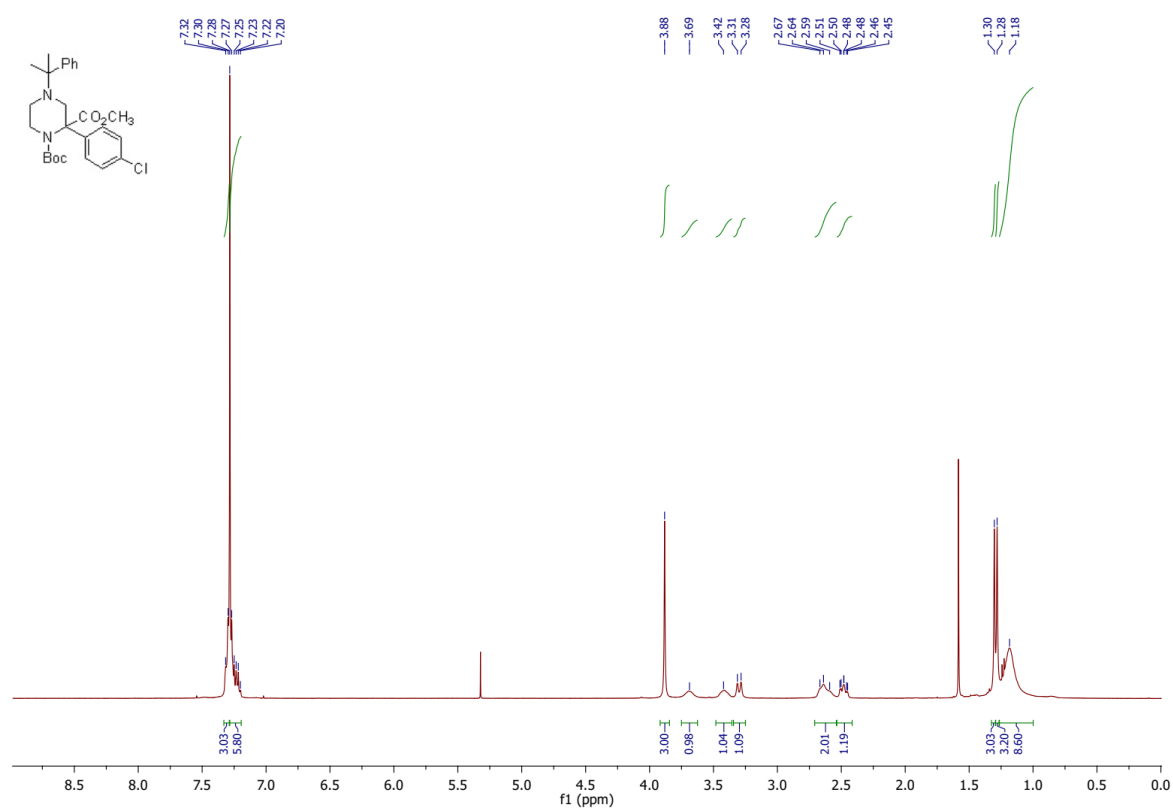

$^{13}\text{C}$   $\{^1\text{H}\}$  NMR spectrum ( $\text{CDCl}_3$ , 100 MHz) of **3f**:

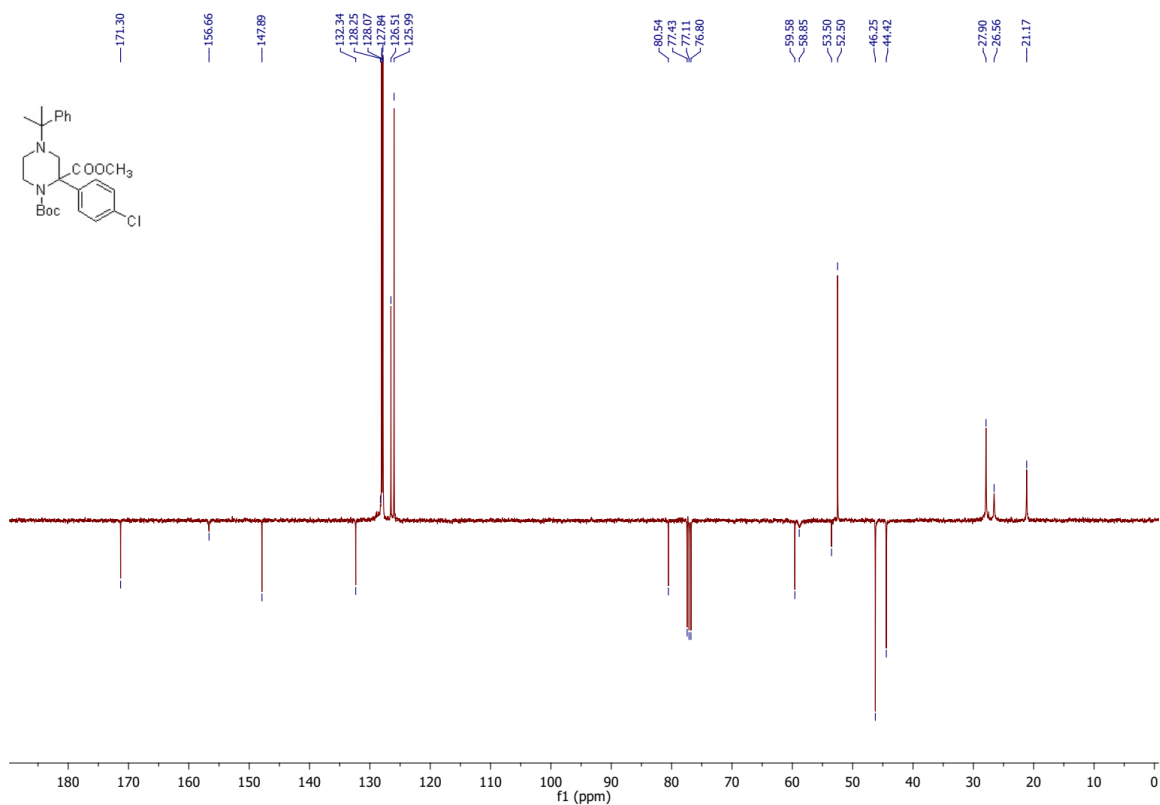

$^1\text{H}$  NMR spectrum ( $\text{CDCl}_3$ , 400 MHz) of **3g**:

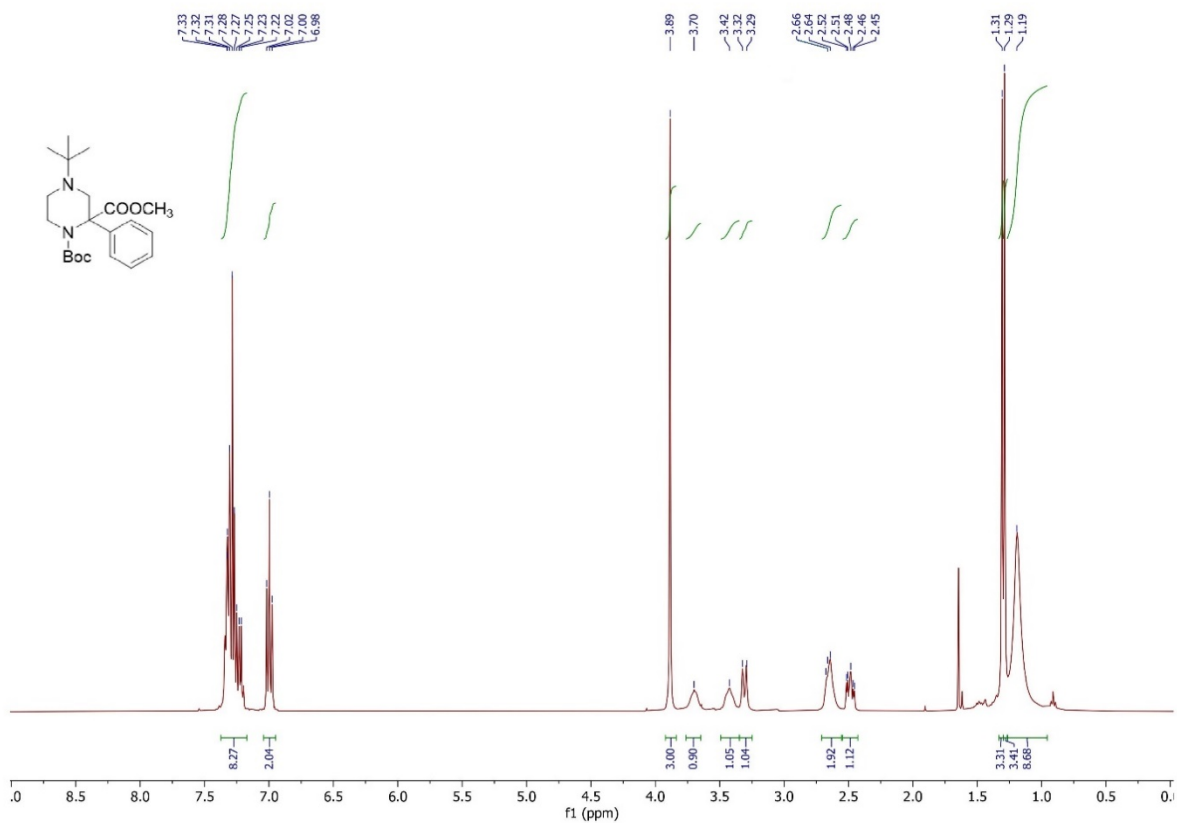

$^{13}\text{C}$   $\{^1\text{H}\}$  NMR spectrum ( $\text{CDCl}_3$ , 100 MHz) of **3g**:

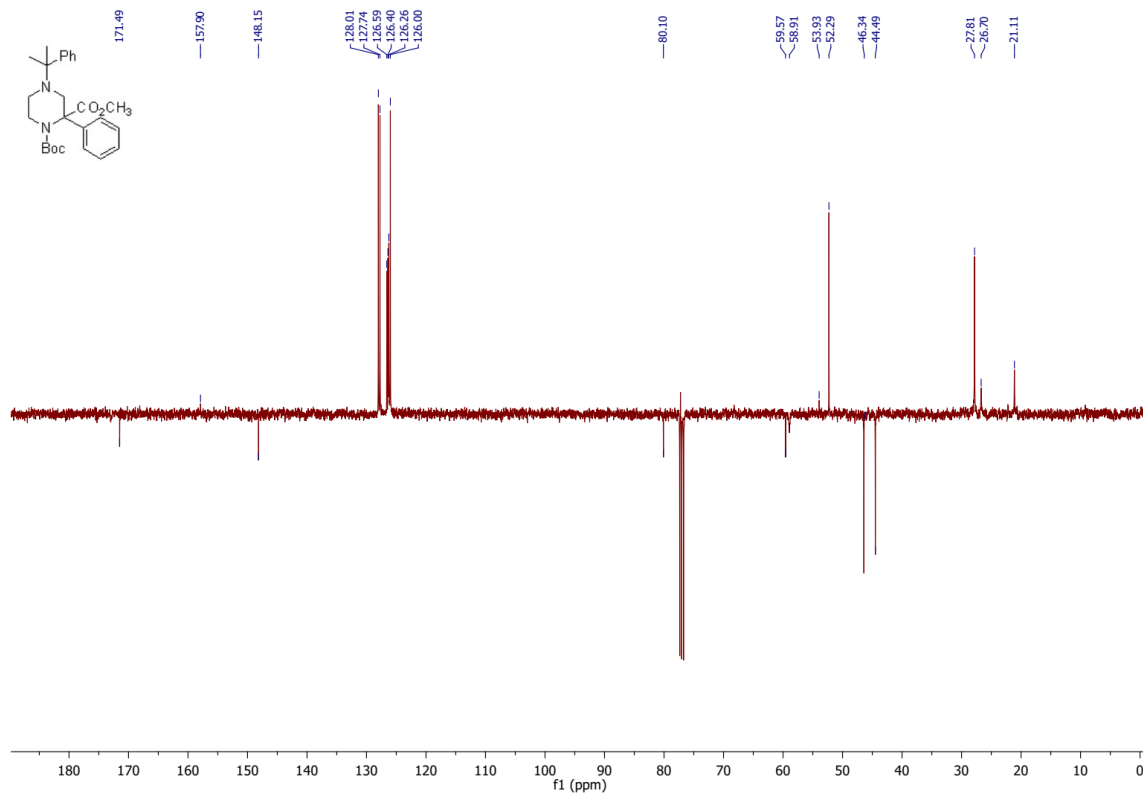

$^1\text{H}$  NMR spectrum ( $\text{CDCl}_3$ , 400 MHz) of **3i**:

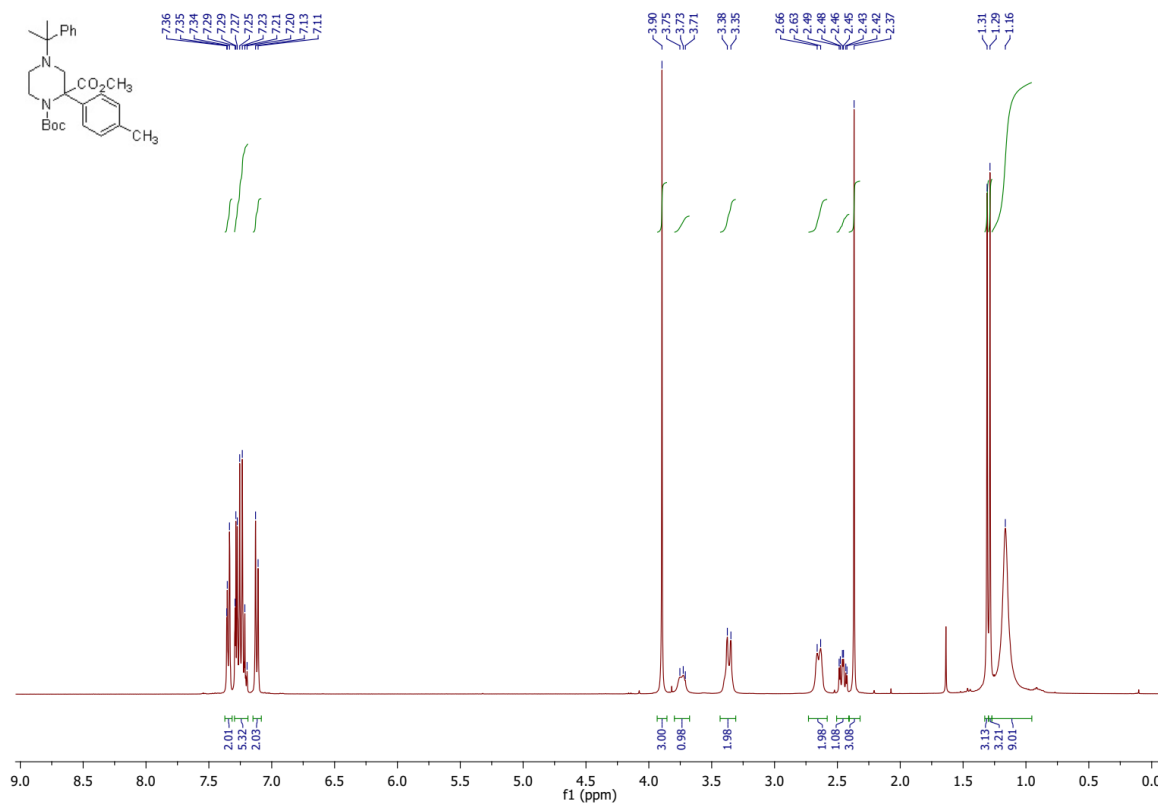

$^{13}\text{C}$   $\{^1\text{H}\}$  NMR spectrum ( $\text{CDCl}_3$ , 100 MHz) of **3i**:

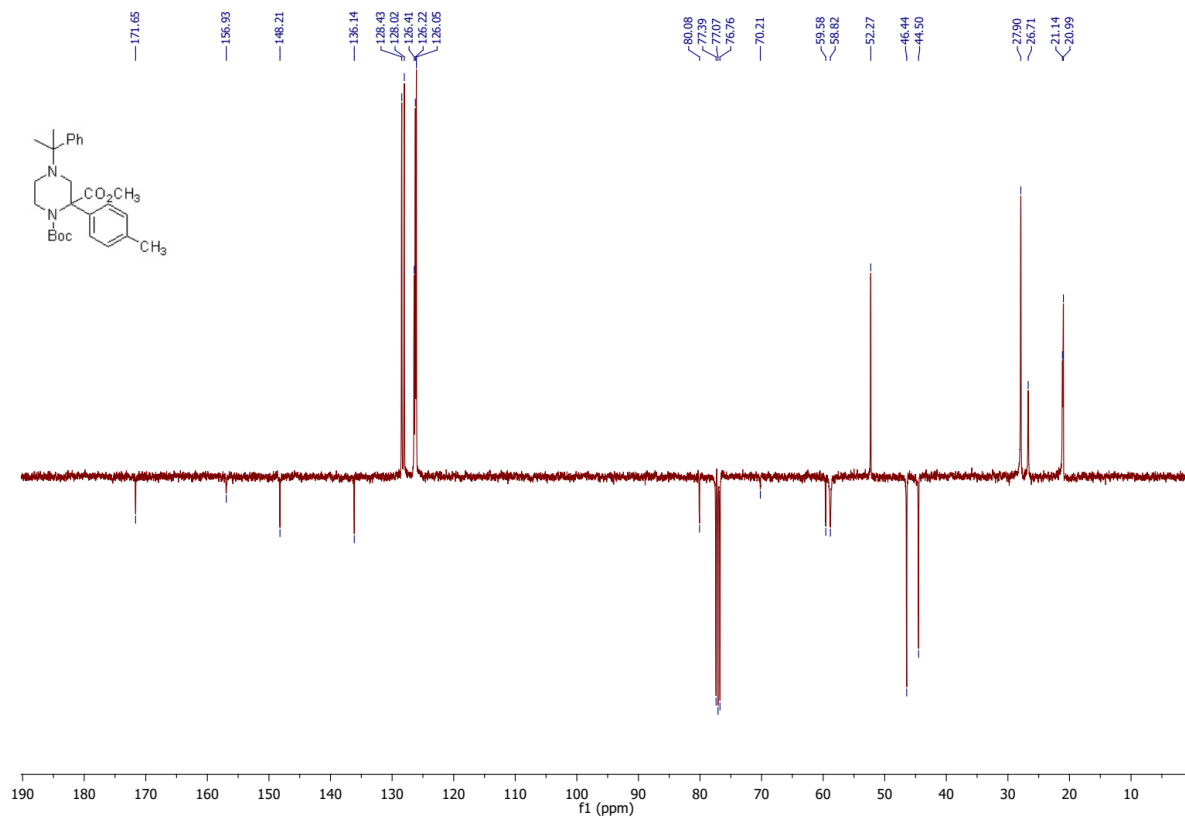

$^1\text{H}$  NMR spectrum ( $\text{CDCl}_3$ , 400 MHz) of **4**:

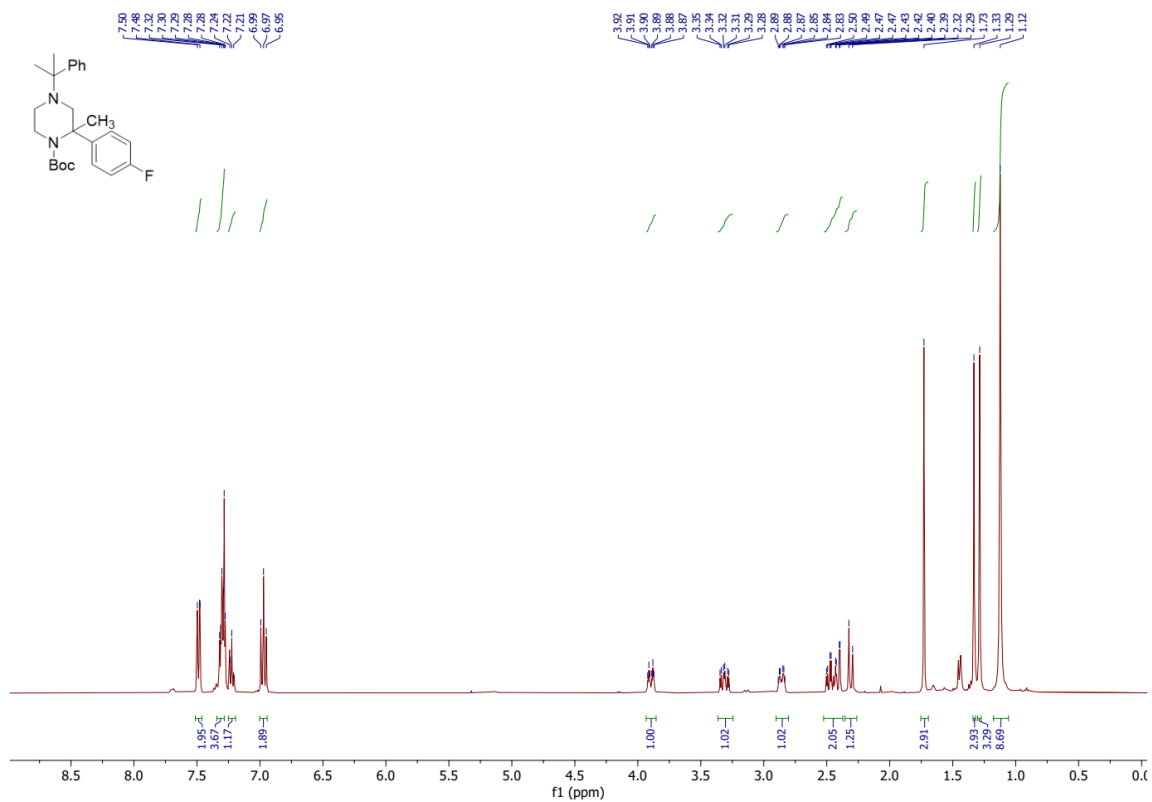

$^{13}\text{C}$   $\{^1\text{H}\}$  NMR spectrum ( $\text{CDCl}_3$ , 100 MHz) of **4**:

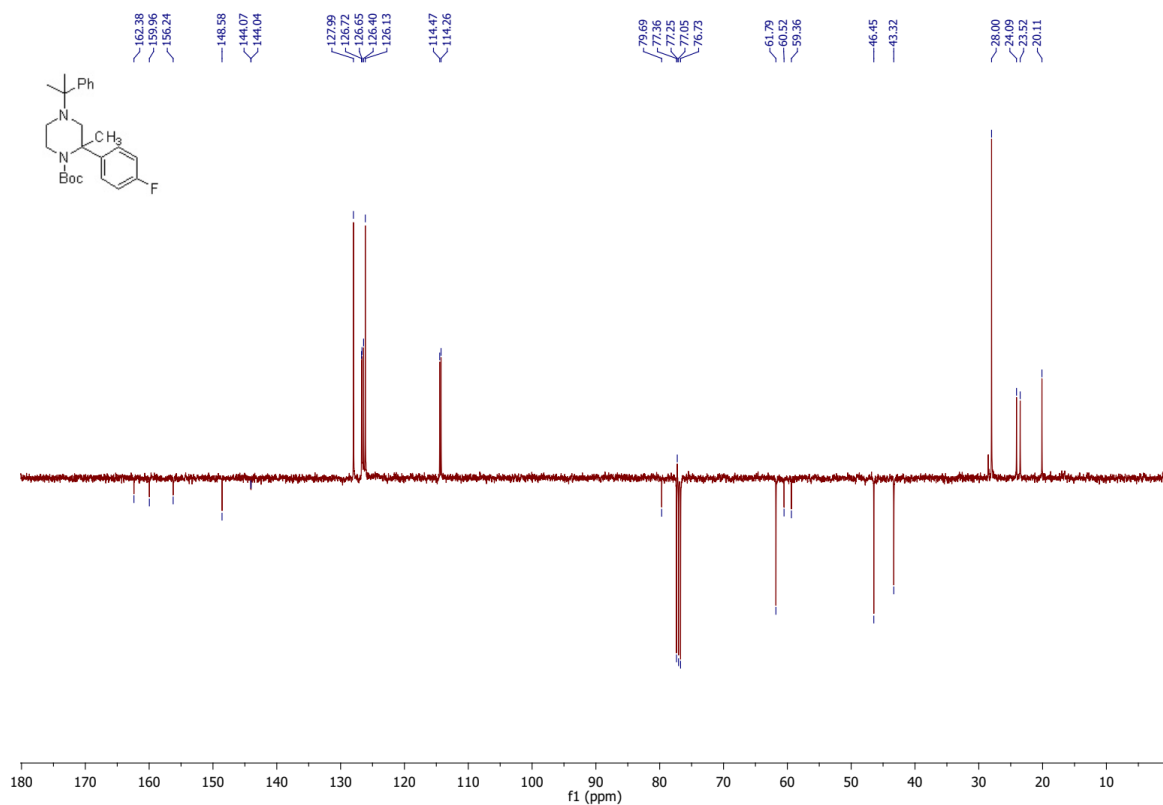

$^{19}\text{F}$  NMR spectrum ( $\text{CDCl}_3$ , 377 MHz) of **4**:

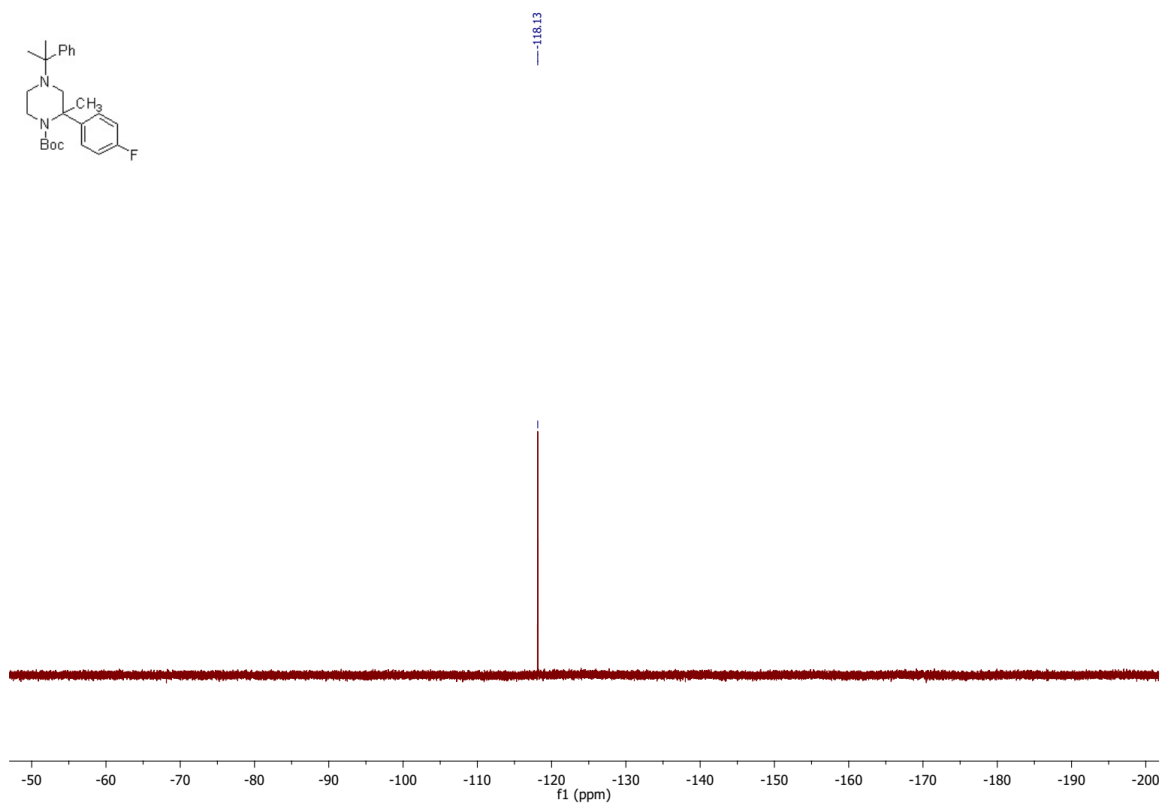

<sup>1</sup>H NMR spectrum (CDCl<sub>3</sub>, 400 MHz) of 5:

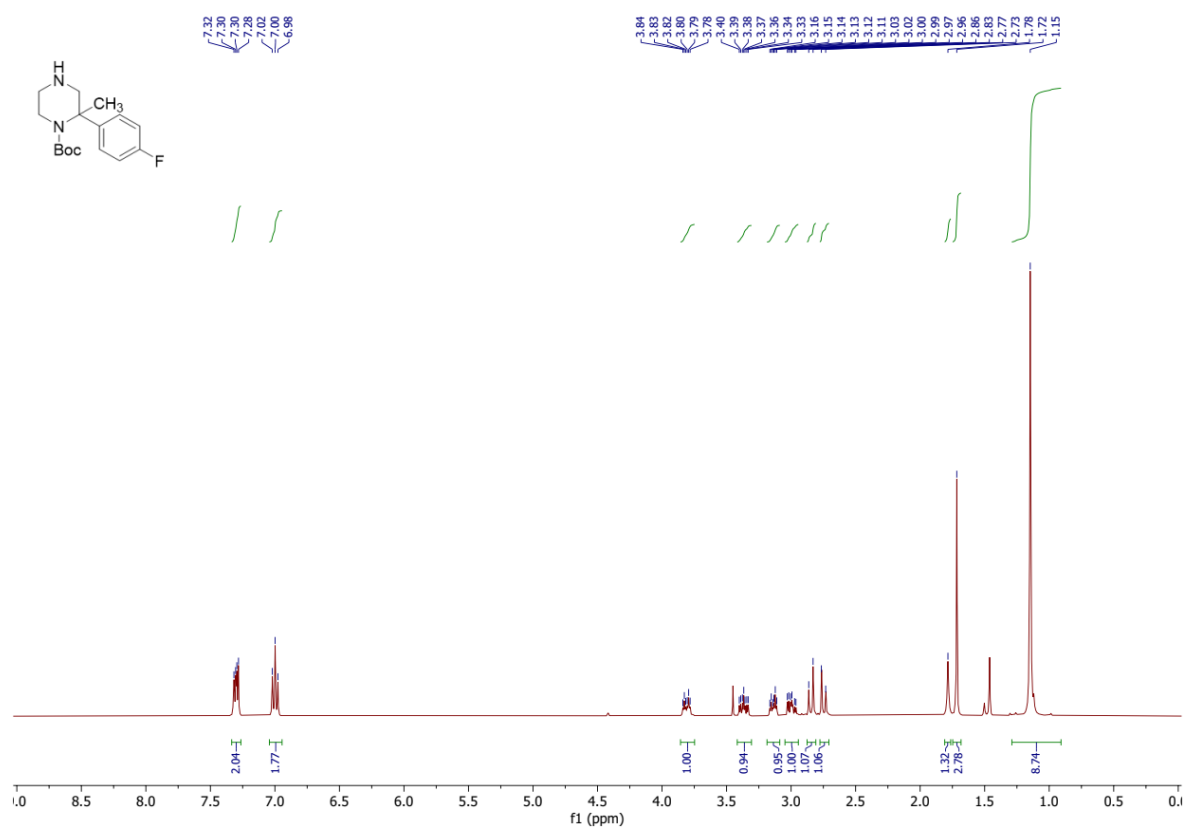

<sup>13</sup>C {<sup>1</sup>H} NMR spectrum (CDCl<sub>3</sub>, 100 MHz) of 5:

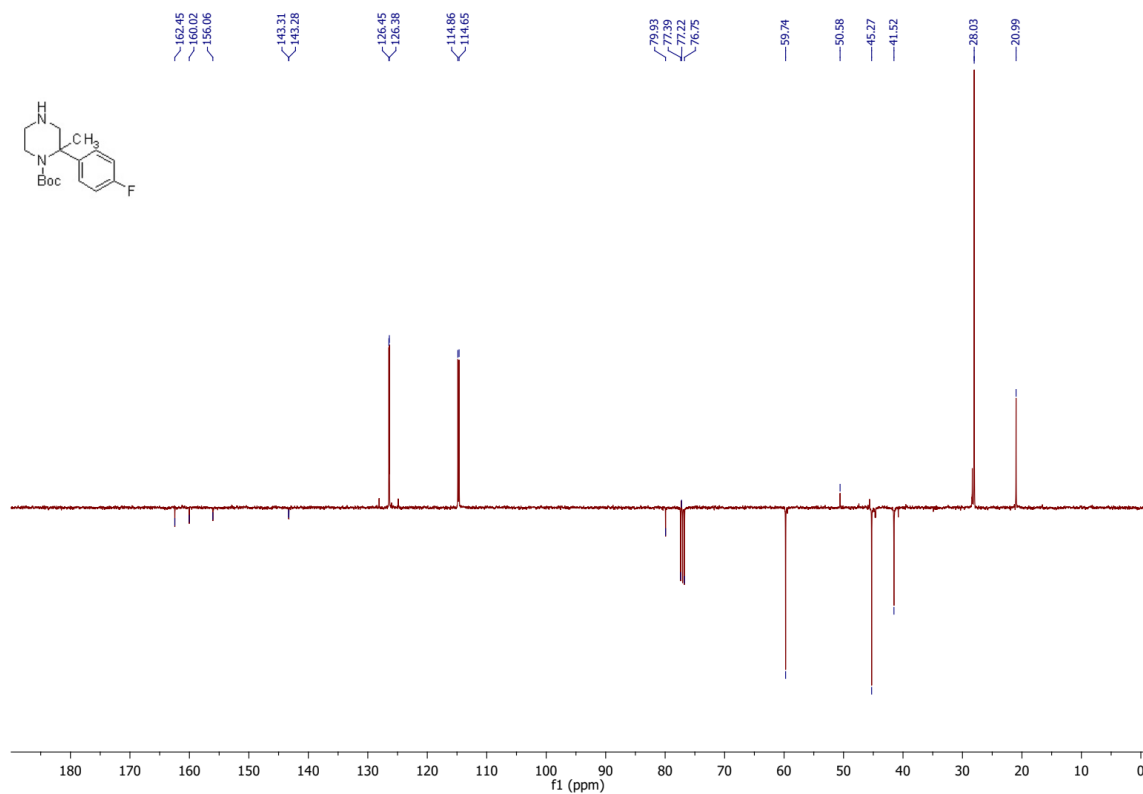



$^{19}\text{F}$  NMR spectrum ( $\text{CDCl}_3$ , 377 MHz) of **5**:

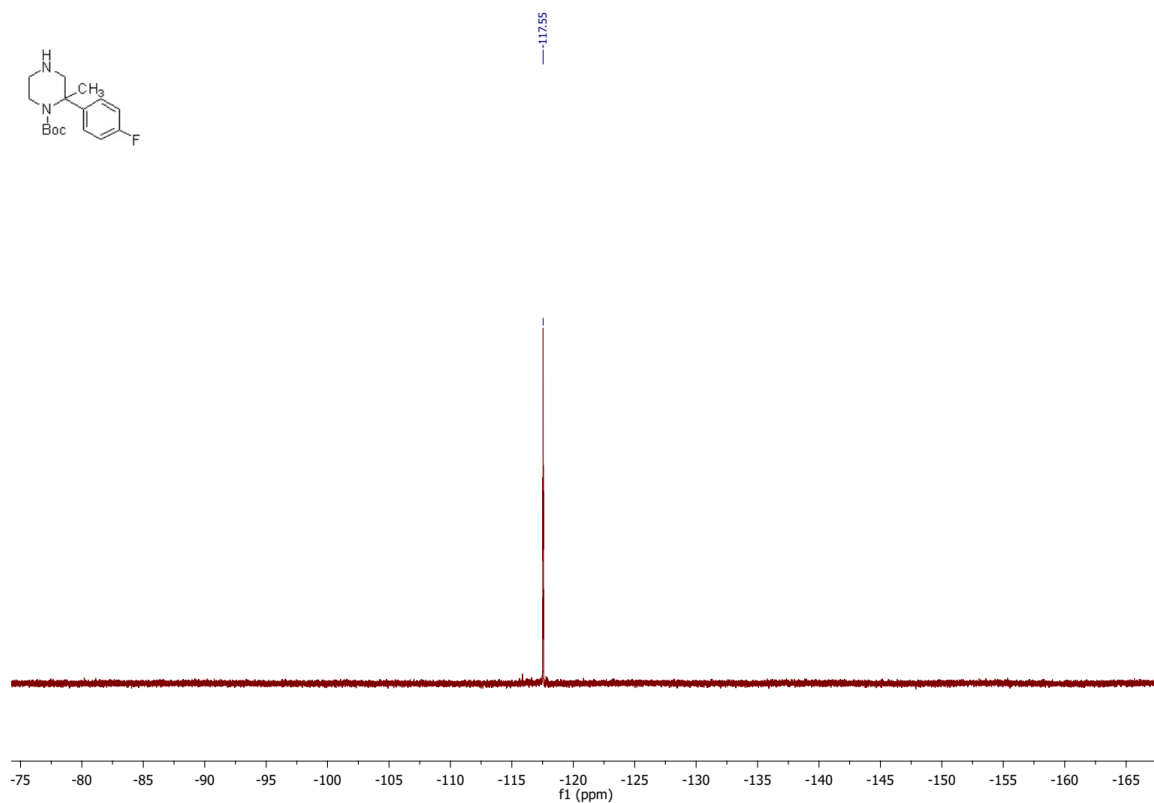

$^1\text{H}$  NMR spectrum ( $\text{CDCl}_3$ , 400 MHz) of **6**:

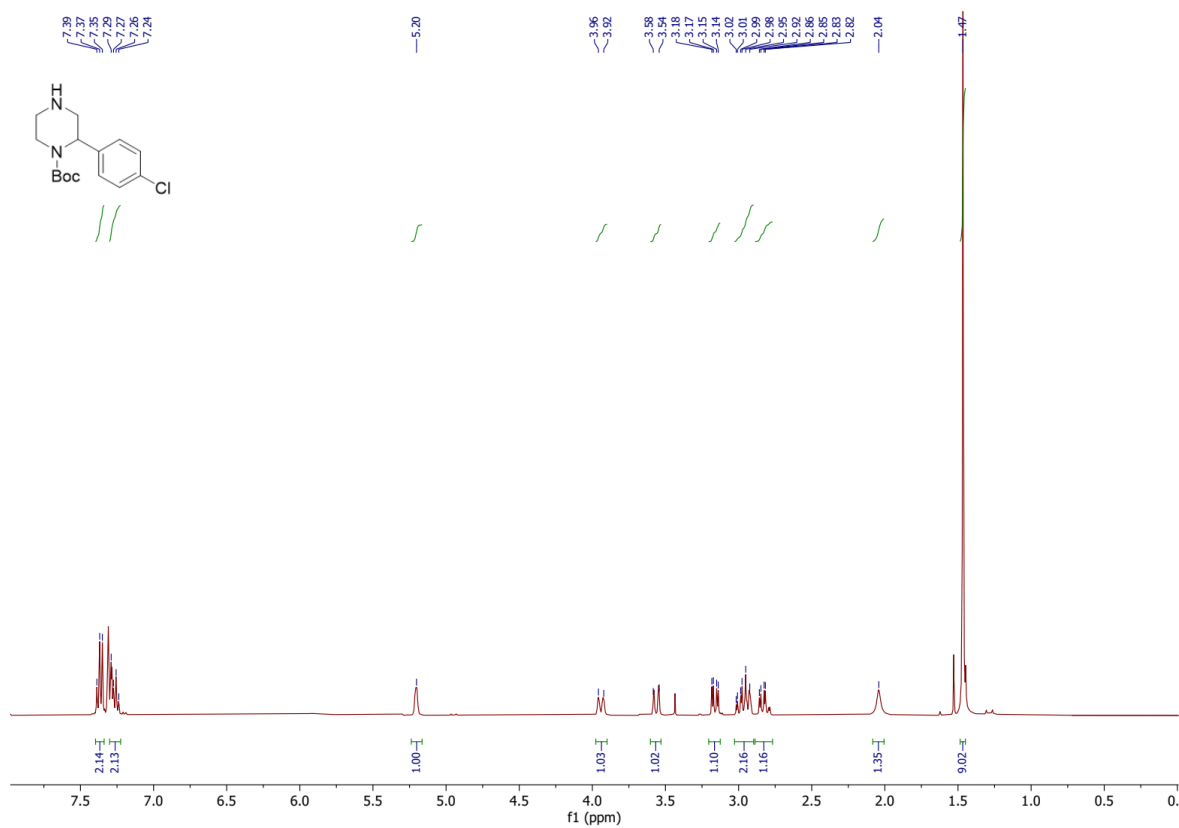

$^{13}\text{C}$   $\{^1\text{H}\}$  NMR spectrum ( $\text{CDCl}_3$ , 100 MHz) of **6**:

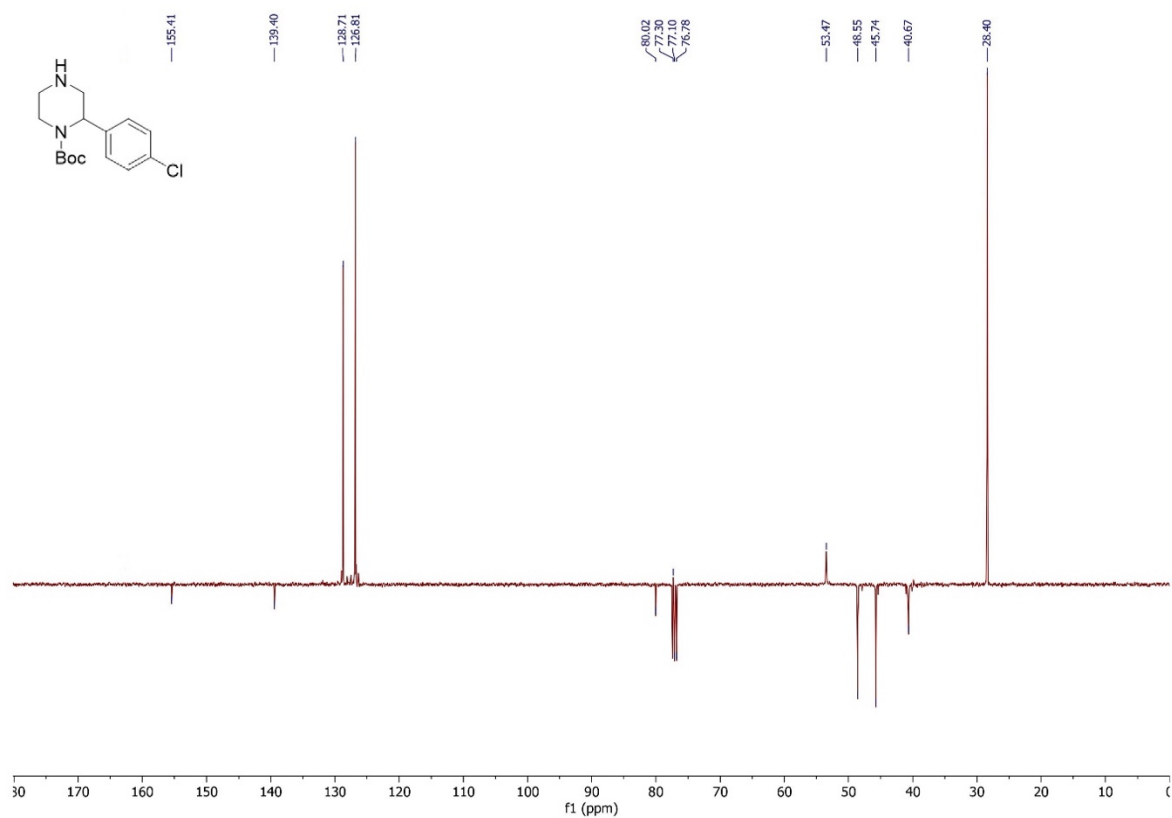

$^1\text{H}$  NMR spectrum ( $\text{CDCl}_3$ , 400 MHz) of **7**:

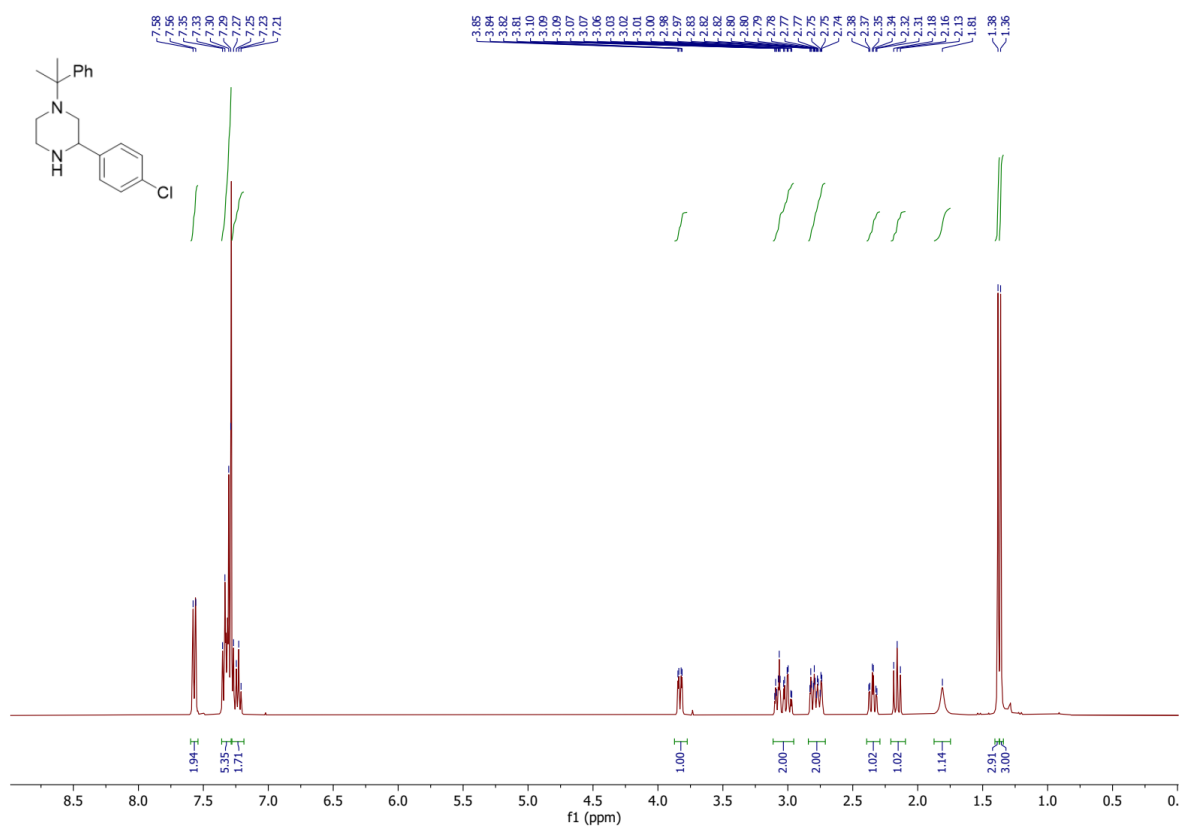



<sup>1</sup>H NMR spectrum (CDCl<sub>3</sub>, 400 MHz) of N-Boc-9:

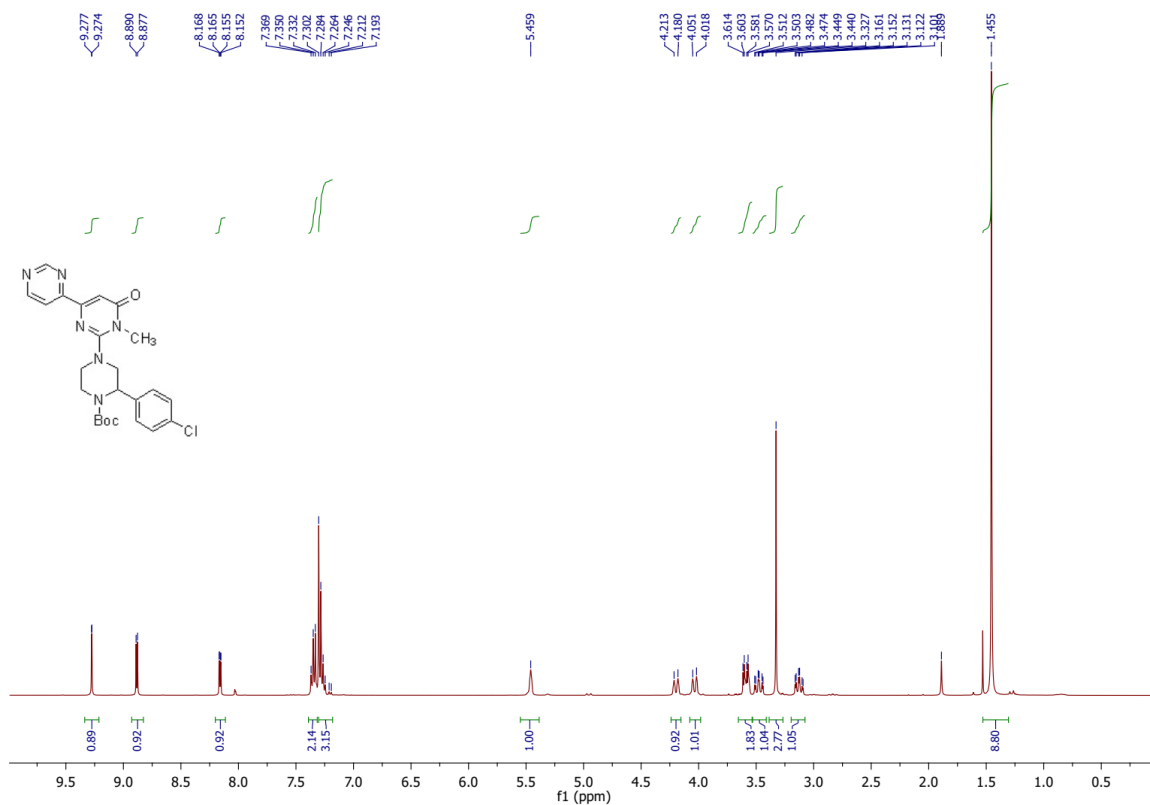

<sup>13</sup>C {<sup>1</sup>H} NMR spectrum (CDCl<sub>3</sub>, 100 MHz) of N-Boc-9:

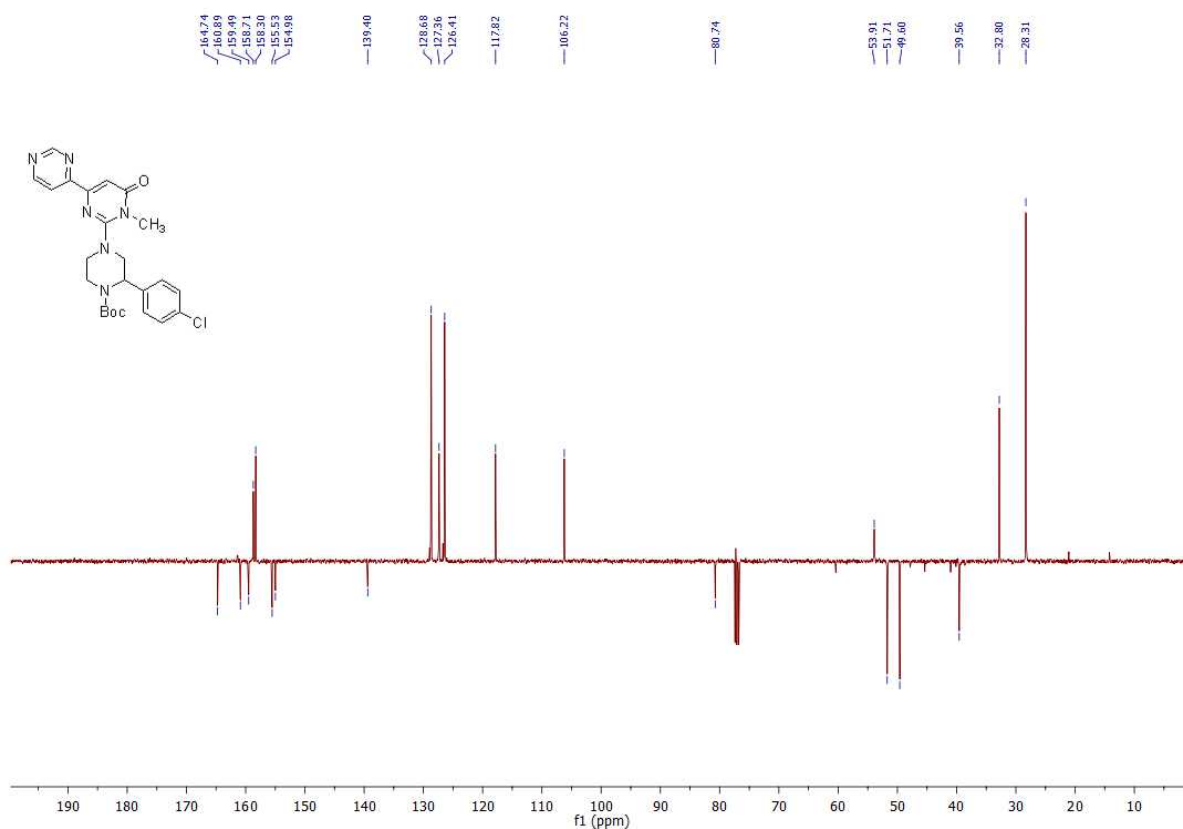

<sup>1</sup>H NMR spectrum (CDCl<sub>3</sub>, 400 MHz) of **9**:

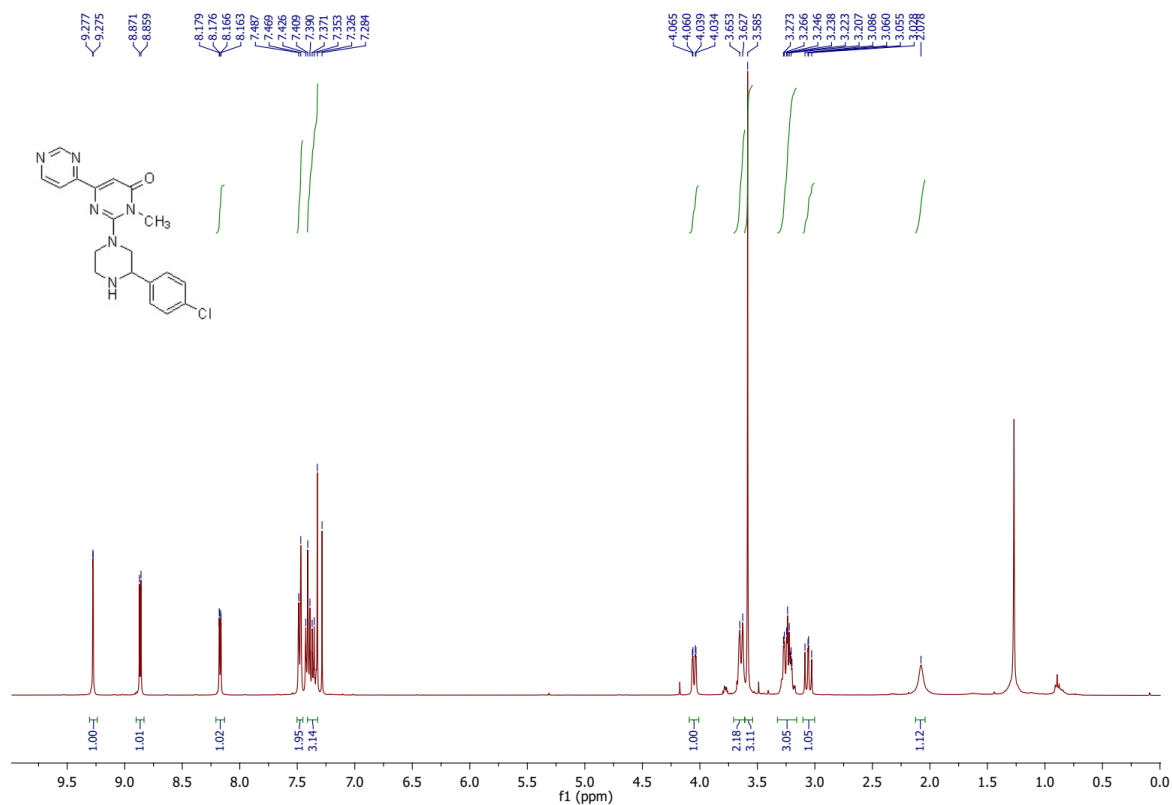

<sup>13</sup>C {<sup>1</sup>H} NMR spectrum (CDCl<sub>3</sub>, 100 MHz) of **9**:

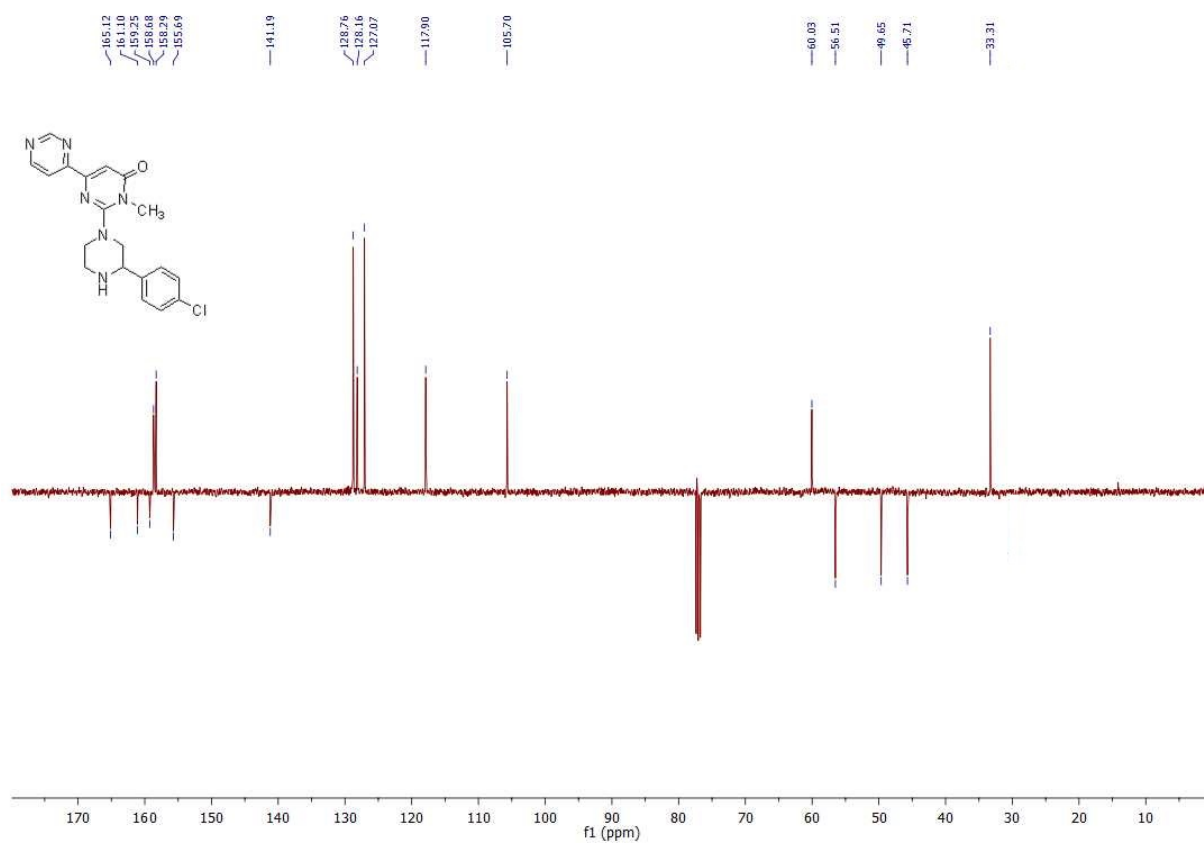

## 5. HPLC traces

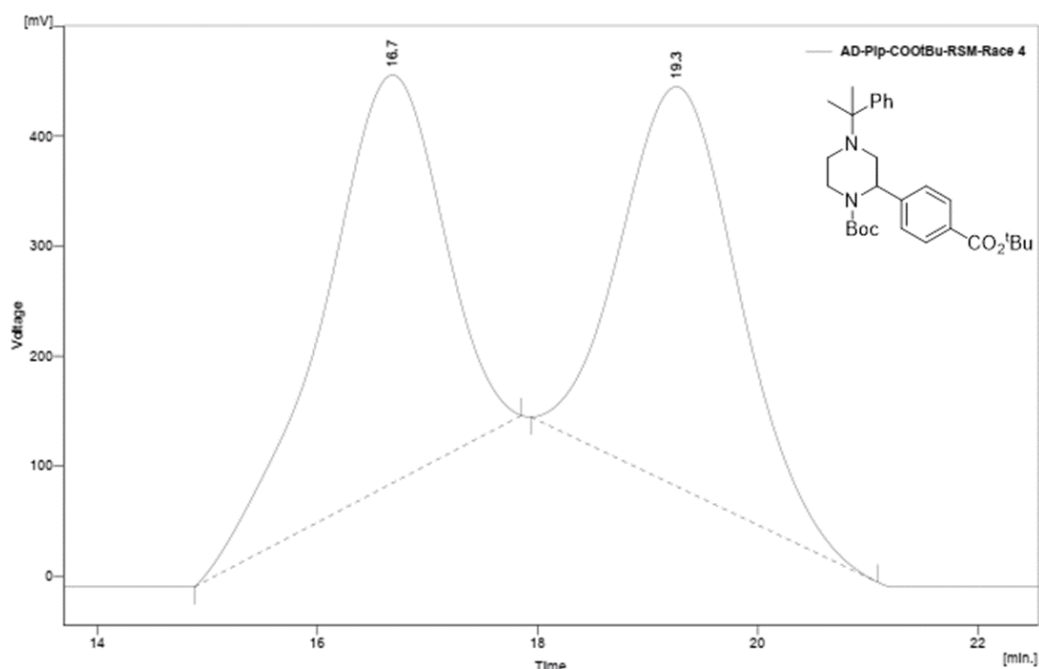

Result Table - Calculation Method Uncal

|       | Reten. Time [min] | Area [mV.s] | Height [mV] | Area [%] | Height [%] | WOS [min] |
|-------|-------------------|-------------|-------------|----------|------------|-----------|
| 1     | 16.680            | 28046.437   | 371.145     | 50.8     | 50.5       | 1.12      |
| 2     | 19.260            | 27215.765   | 363.376     | 49.2     | 49.5       | 1.17      |
| Total |                   | 55262.202   | 734.521     | 100.0    | 100.0      |           |

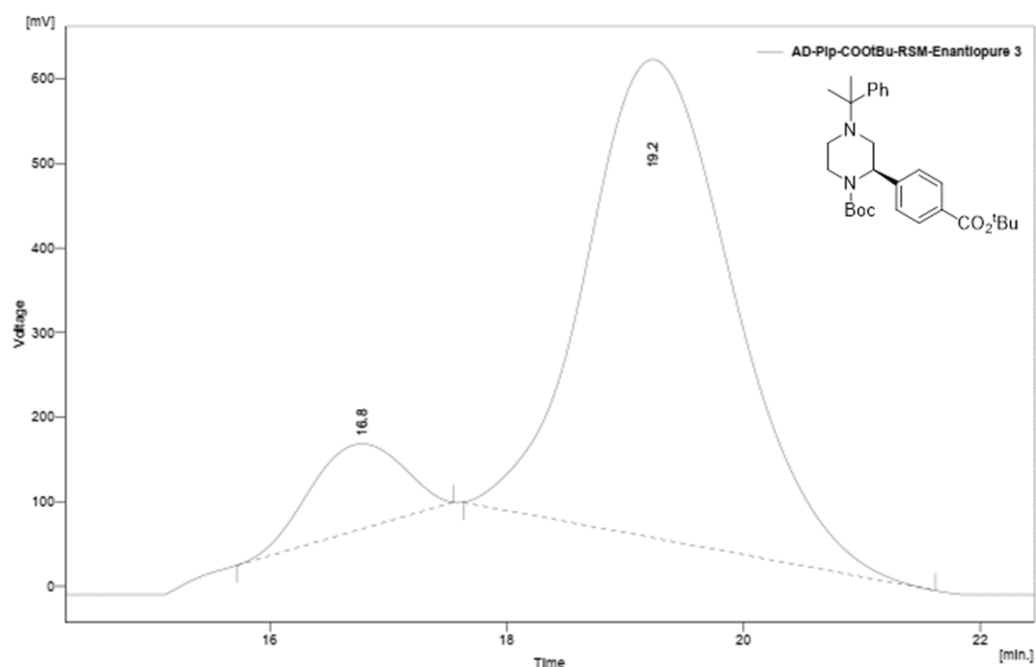

Result Table - Calculation Method Uncal

|       | Reten. Time [min] | Area [mV.s] | Height [mV] | Area [%] | Height [%] | WOS [min] |
|-------|-------------------|-------------|-------------|----------|------------|-----------|
| 1     | 16.780            | 5577.203    | 100.583     | 10.2     | 15.1       | 0.94      |
| 2     | 19.233            | 49241.399   | 566.033     | 89.8     | 84.9       | 1.32      |
| Total |                   | 54818.602   | 666.616     | 100.0    | 100.0      |           |

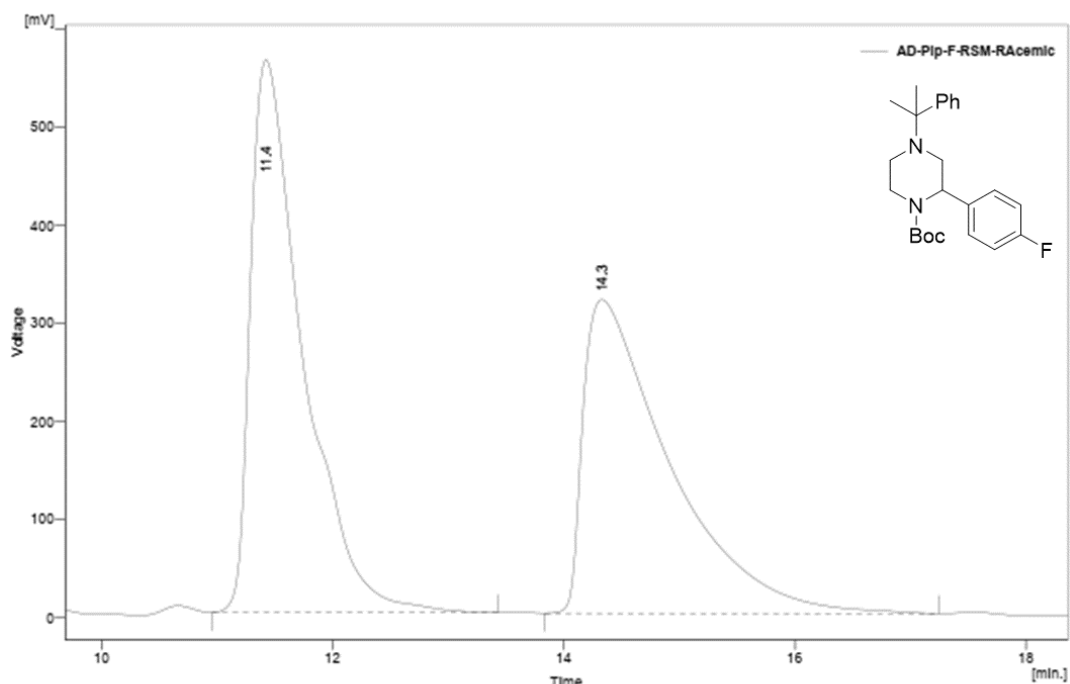

Result Table - Calculation Method Uncal

|   | Reten. Time [min] | Area [mV.s] | Height [mV] | Area [%] | Height [%] | WOS [min] |
|---|-------------------|-------------|-------------|----------|------------|-----------|
| 1 | 11.423            | 17833.996   | 563.804     | 51.8     | 63.8       | 0.45      |
| 2 | 14.330            | 16564.915   | 319.709     | 48.2     | 36.2       | 0.75      |
|   | Total             | 34398.911   | 883.513     | 100.0    | 100.0      |           |

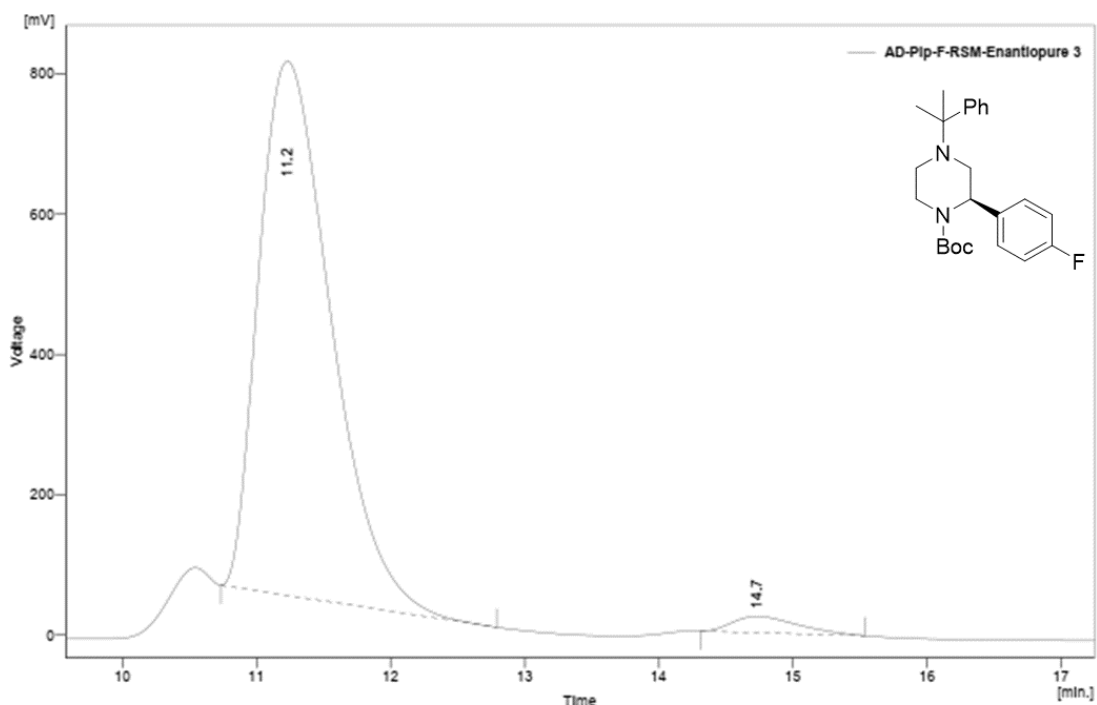

Result Table - Calculation Method Uncal

|   | Reten. Time [min] | Area [mV.s] | Height [mV] | Area [%] | Height [%] | WOS [min] |
|---|-------------------|-------------|-------------|----------|------------|-----------|
| 1 | 11.230            | 28550.717   | 761.679     | 97.3     | 97.0       | 0.59      |
| 2 | 14.730            | 806.484     | 23.509      | 2.7      | 3.0        | 0.52      |
|   | Total             | 29357.200   | 785.188     | 100.0    | 100.0      |           |

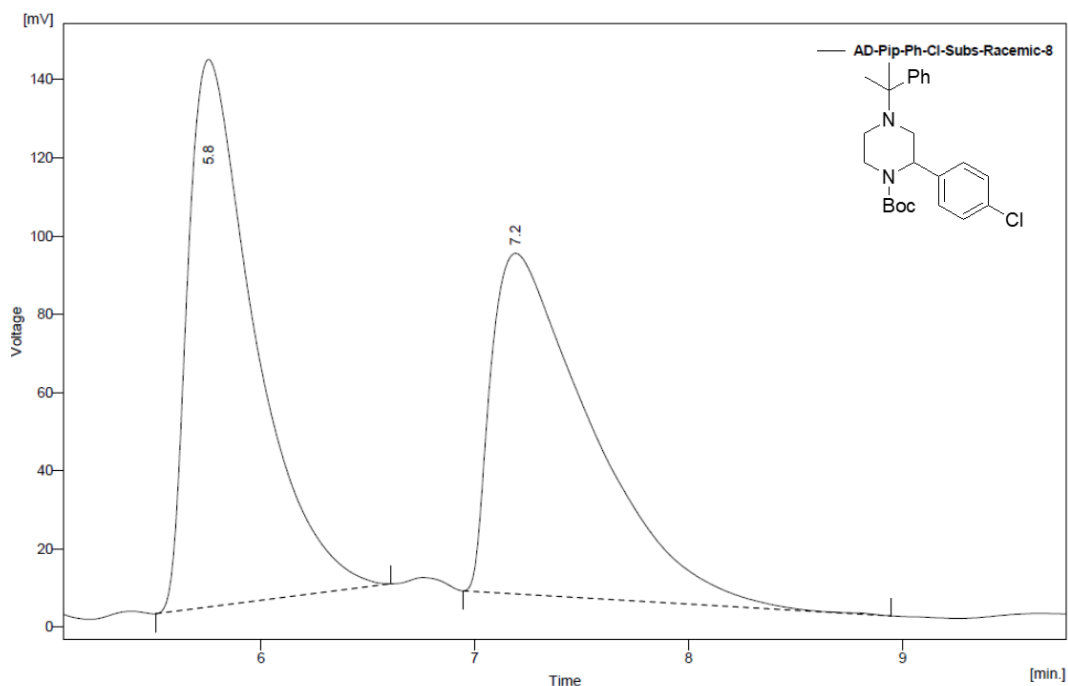

Result Table - Calculation Method Uncal

|   | Reten. Time [min] | Area [mV.s] | Height [mV] | Area [%] | Height [%] | W05 [min] |
|---|-------------------|-------------|-------------|----------|------------|-----------|
| 1 | 5.753             | 3054.674    | 139.986     | 51.7     | 61.7       | 0.33      |
| 2 | 7.190             | 2848.330    | 87.070      | 48.3     | 38.3       | 0.49      |
|   | Total             | 5903.004    | 227.056     | 100.0    | 100.0      |           |

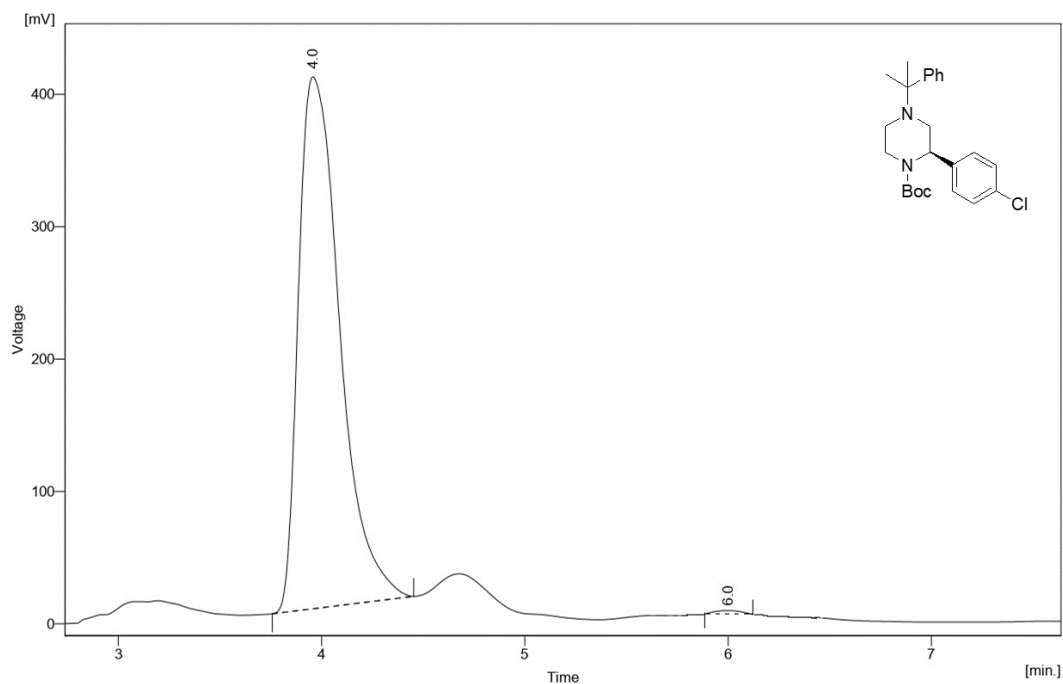

Result Table - Calculation Method Uncal

|   | Reten. Time [min] | Area [mV.s] | Height [mV] | Area [%] | Height [%] | W05 [min] |
|---|-------------------|-------------|-------------|----------|------------|-----------|
| 1 | 3.957             | 5681.100    | 401.929     | 98.7     | 97.1       | 0.22      |
| 2 | 6.023             | 257.636     | 11.980      | 1.3      | 2.9        | 0.37      |
|   | Total             | 5938.736    | 413.909     | 100.0    | 100.0      |           |



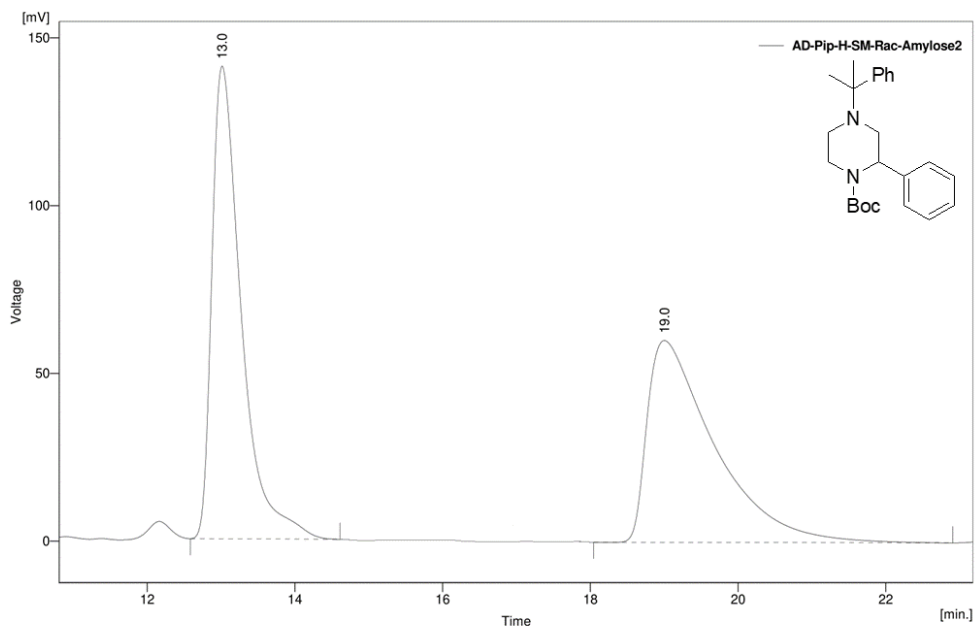

Result Table - Calculation Method Uncal

|       | Reten. Time [min] | Area [mV.s] | Height [mV] | Area [%] | Height [%] | W05 [min] |
|-------|-------------------|-------------|-------------|----------|------------|-----------|
| 1     | 13.017            | 3893.827    | 140.937     | 50.5     | 70.1       | 0.40      |
| 2     | 19.003            | 3813.256    | 60.227      | 49.5     | 29.9       | 0.92      |
| Total |                   | 7707.083    | 201.164     | 100.0    | 100.0      |           |

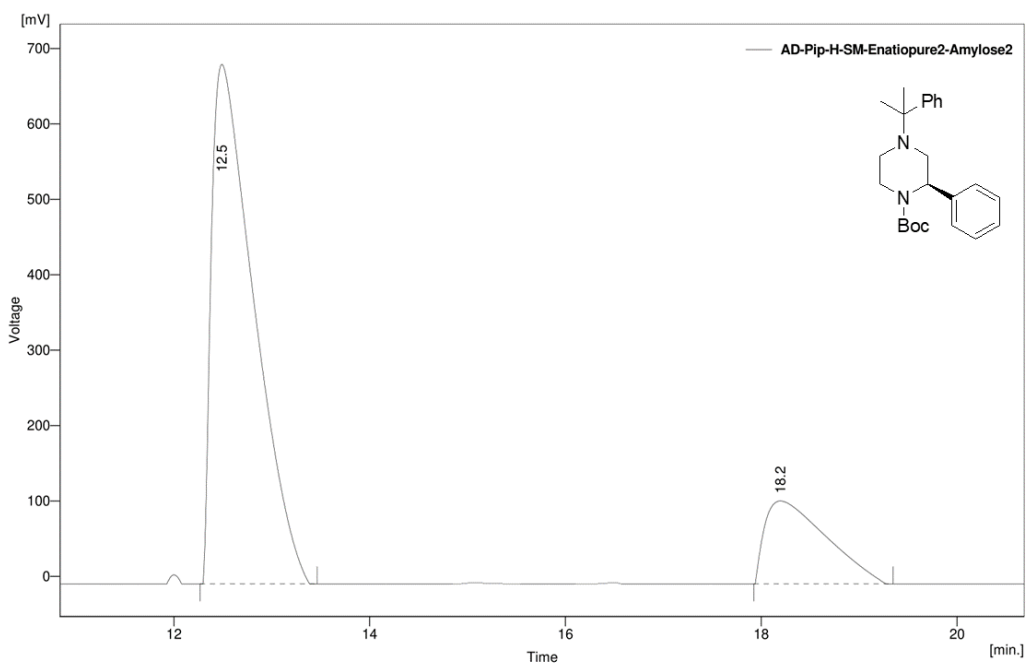

Result Table - Calculation Method Uncal

|       | Reten. Time [min] | Area [mV.s] | Height [mV] | Area [%] | Height [%] | W05 [min] |
|-------|-------------------|-------------|-------------|----------|------------|-----------|
| 1     | 12.490            | 20727.952   | 689.025     | 81.2     | 86.2       | 0.48      |
| 2     | 18.197            | 4807.146    | 109.984     | 18.8     | 13.8       | 0.73      |
| Total |                   | 25535.098   | 799.010     | 100.0    | 100.0      |           |

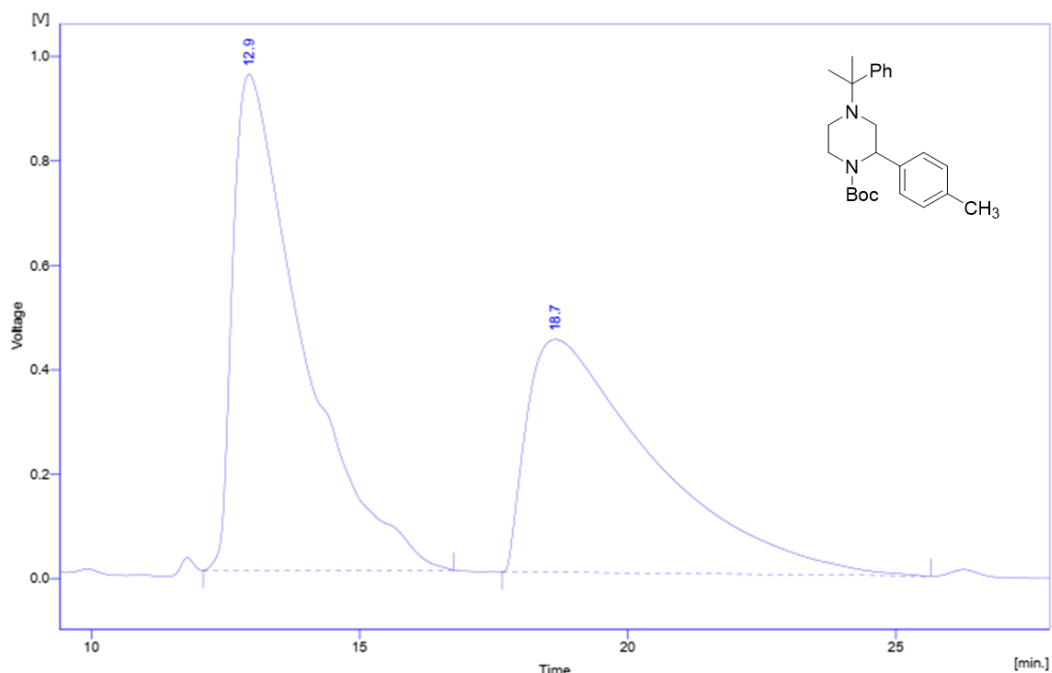

Result Table - Calculation Method Uncal

|       | Reten. Time [min] | Area [mV.s] | Height [mV] | Area [%] | Height [%] | W05 [min] |
|-------|-------------------|-------------|-------------|----------|------------|-----------|
| 1     | 12.937            | 85247.406   | 949.959     | 53.7     | 68.0       | 1.26      |
| 2     | 18.650            | 73459.277   | 446.110     | 46.3     | 32.0       | 2.41      |
| Total |                   | 158706.683  | 1396.070    | 100.0    | 100.0      |           |

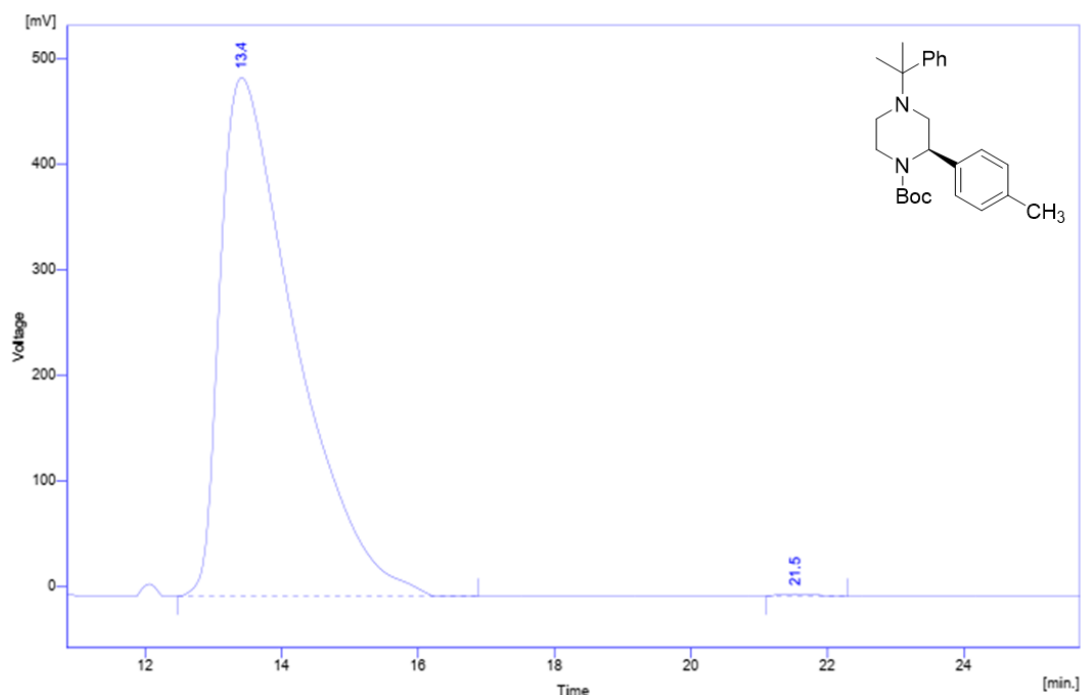

Result Table - Calculation Method Uncal

|       | Reten. Time [min] | Area [mV.s] | Height [mV] | Area [%] | Height [%] | W05 [min] |
|-------|-------------------|-------------|-------------|----------|------------|-----------|
| 1     | 13.413            | 37601.857   | 491.686     | 99.7     | 99.5       | 1.15      |
| 2     | 21.527            | 103.556     | 2.660       | 0.3      | 0.5        | 0.69      |
| Total |                   | 37705.413   | 494.346     | 100.0    | 100.0      |           |

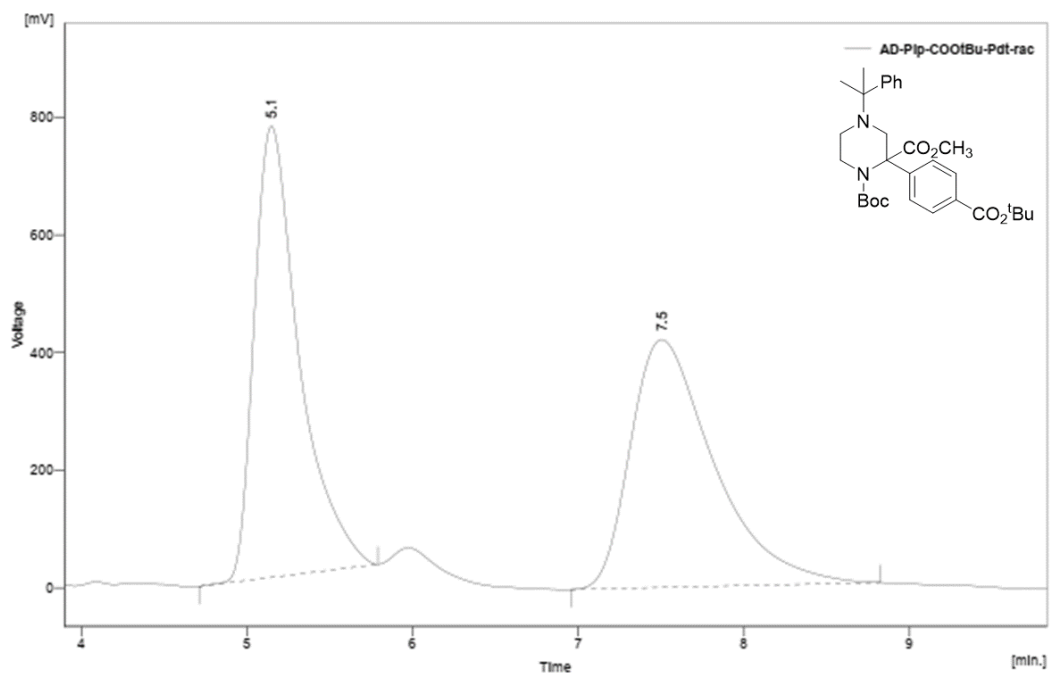

Result Table - Calculation Method Uncal

|       | Reten. Time [min] | Area [mV.s] | Height [mV] | Area [%] | Height [%] | W05 [min] |
|-------|-------------------|-------------|-------------|----------|------------|-----------|
| 1     | 5.147             | 14555.523   | 767.520     | 49.6     | 64.6       | 0.28      |
| 2     | 7.503             | 14779.750   | 421.497     | 50.4     | 35.4       | 0.53      |
| Total |                   | 29335.273   | 1189.017    | 100.0    | 100.0      |           |

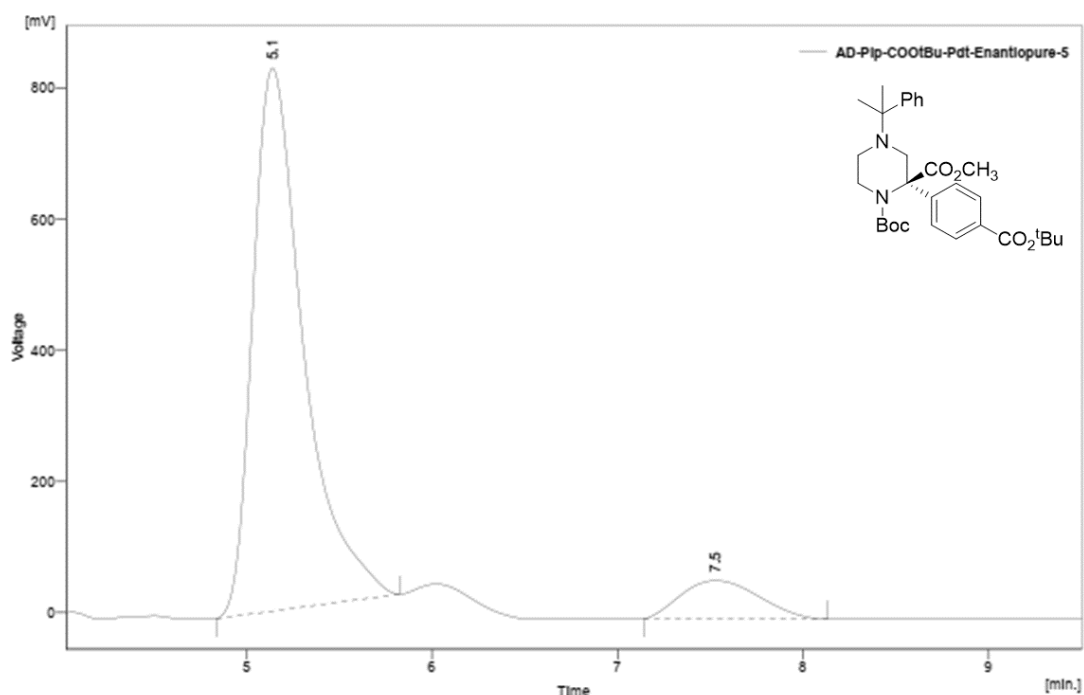

Result Table - Calculation Method Uncal

|       | Reten. Time [min] | Area [mV.s] | Height [mV] | Area [%] | Height [%] | W05 [min] |
|-------|-------------------|-------------|-------------|----------|------------|-----------|
| 1     | 5.140             | 15816.978   | 829.848     | 90.3     | 93.4       | 0.28      |
| 2     | 7.527             | 1701.612    | 58.385      | 9.7      | 6.6        | 0.49      |
| Total |                   | 17518.590   | 888.233     | 100.0    | 100.0      |           |

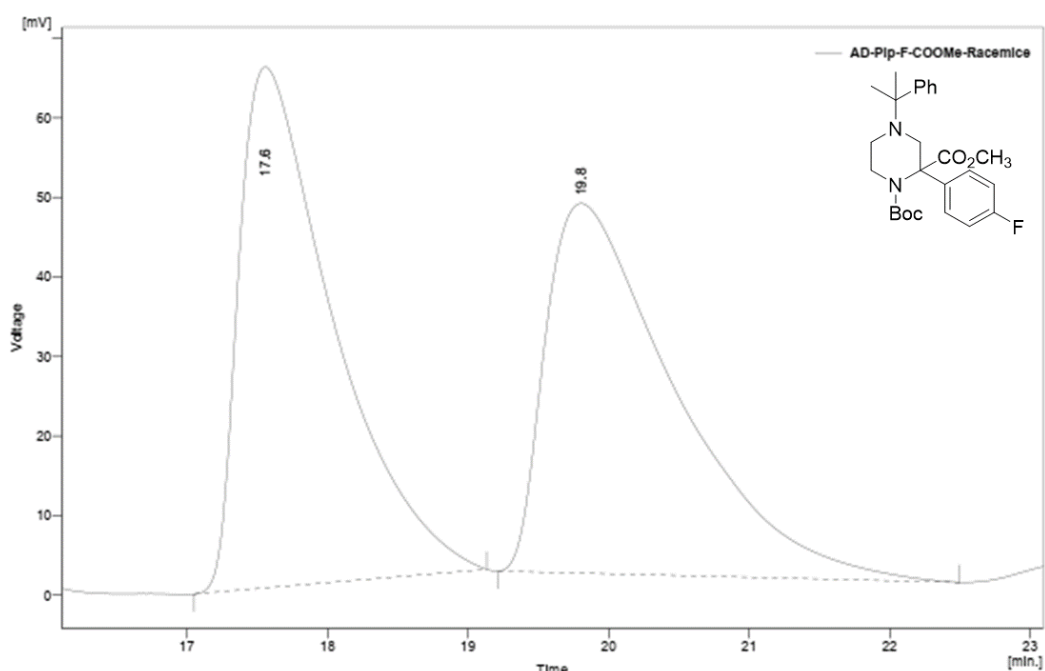

Result Table - Calculation Method Uncal

|   | Reten. Time [min] | Area [mV.s] | Height [mV] | Area [%] | Height [%] | W05 [min] |
|---|-------------------|-------------|-------------|----------|------------|-----------|
| 1 | 17.557            | 3055.515    | 65.492      | 50.5     | 58.5       | 0.72      |
| 2 | 19.803            | 2995.413    | 46.478      | 49.5     | 41.5       | 0.96      |
|   | Total             | 6050.928    | 111.970     | 100.0    | 100.0      |           |

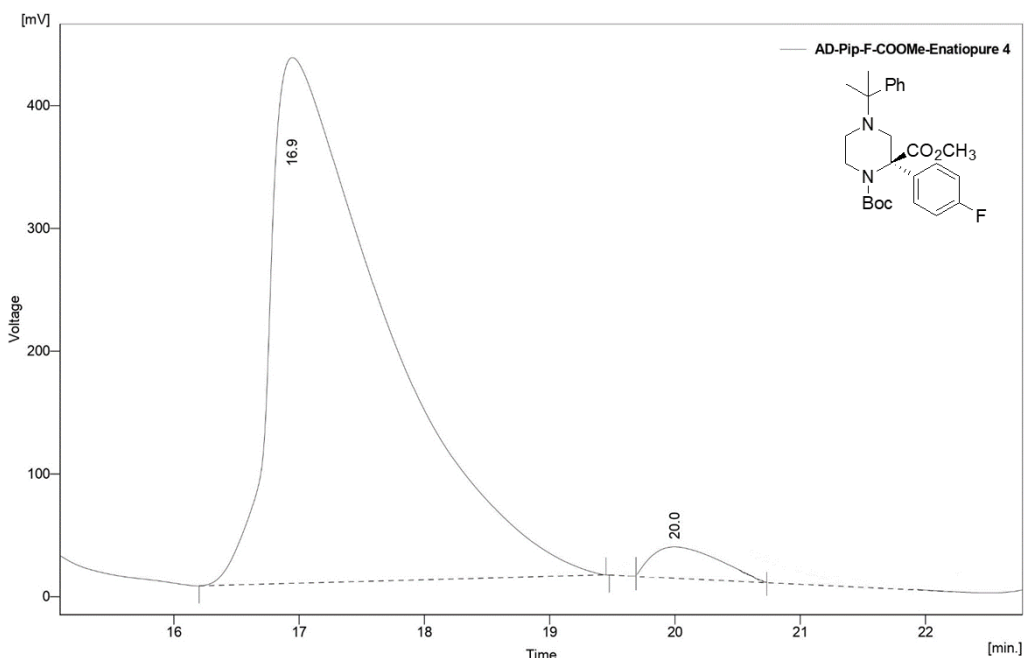

Result Table - Calculation Method Uncal

|   | Reten. Time [min] | Area [mV.s] | Height [mV] | Area [%] | Height [%] | W05 [min] |
|---|-------------------|-------------|-------------|----------|------------|-----------|
| 1 | 16.947            | 27626.956   | 428.153     | 97.3     | 90.8       | 0.94      |
| 2 | 20.000            | 2635.129    | 43.124      | 2.7      | 9.2        | 0.87      |
|   | Total             | 30262.085   | 471.277     | 100.0    | 100.0      |           |

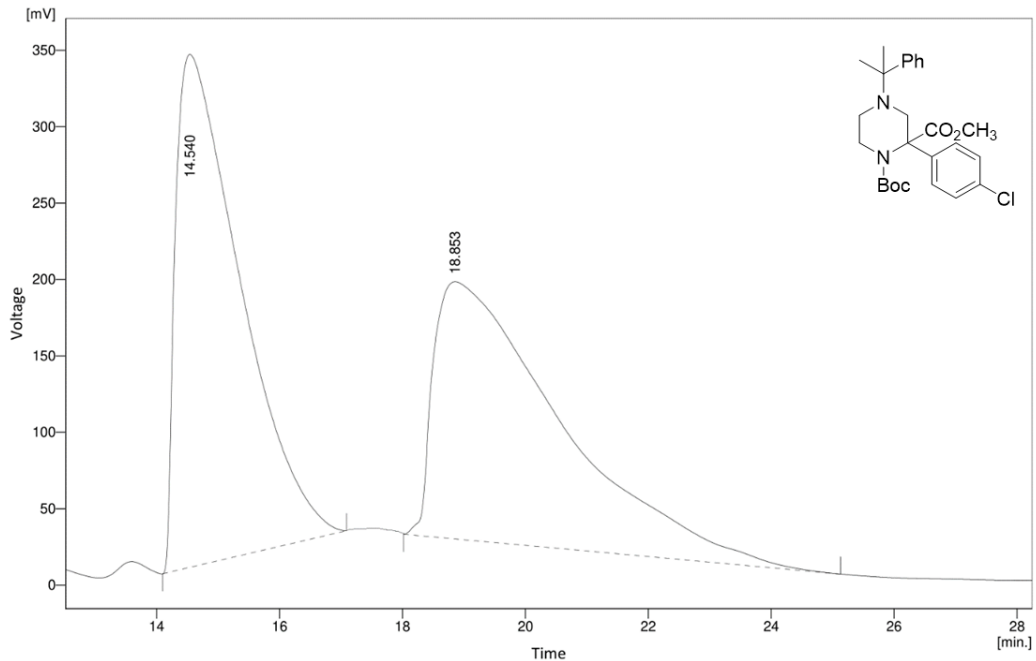

Result Table - Calculation Method Uncal

|       | Reten. Time [min] | Area [mV.s] | Height [mV] | Area [%] | Height [%] | W05 [min] |
|-------|-------------------|-------------|-------------|----------|------------|-----------|
| 1     | 14.540            | 24603.020   | 335.749     | 50.4     | 66.6       | 1.20      |
| 2     | 18.853            | 24182.519   | 168.288     | 49.6     | 33.4       | 2.02      |
| Total |                   | 48785.539   | 504.037     | 100.0    | 100.0      |           |

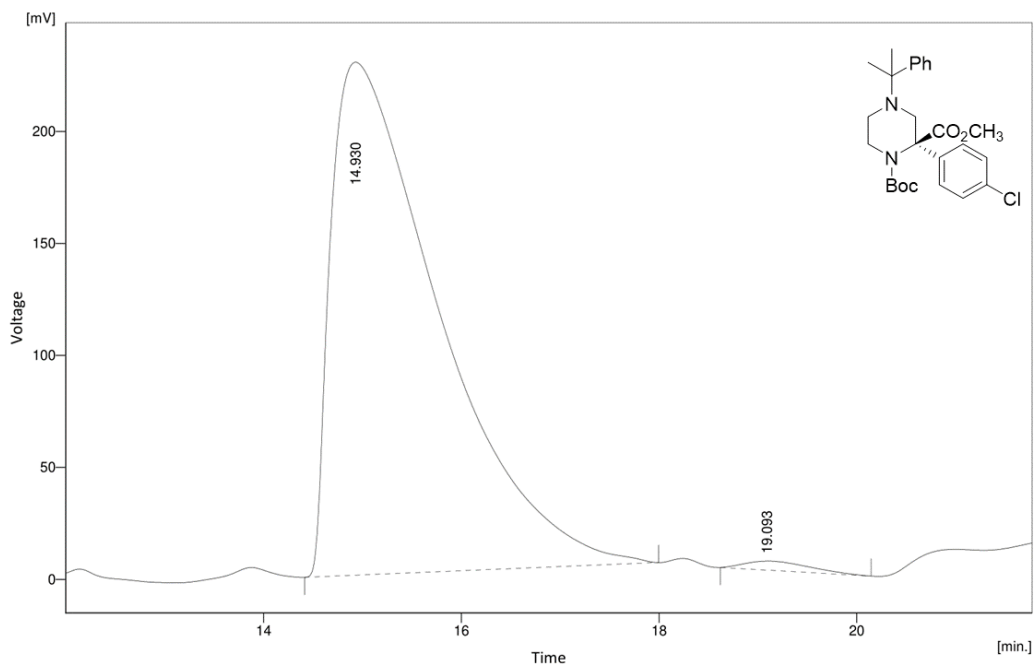

Result Table - Calculation Method Uncal

|       | Reten. Time [min] | Area [mV.s] | Height [mV] | Area [%] | Height [%] | W05 [min] |
|-------|-------------------|-------------|-------------|----------|------------|-----------|
| 1     | 14.930            | 17384.240   | 229.065     | 98.9     | 98.3       | 1.17      |
| 2     | 19.093            | 188.612     | 4.032       | 1.1      | 1.7        | 0.69      |
| Total |                   | 17572.852   | 233.097     | 100.0    | 100.0      |           |

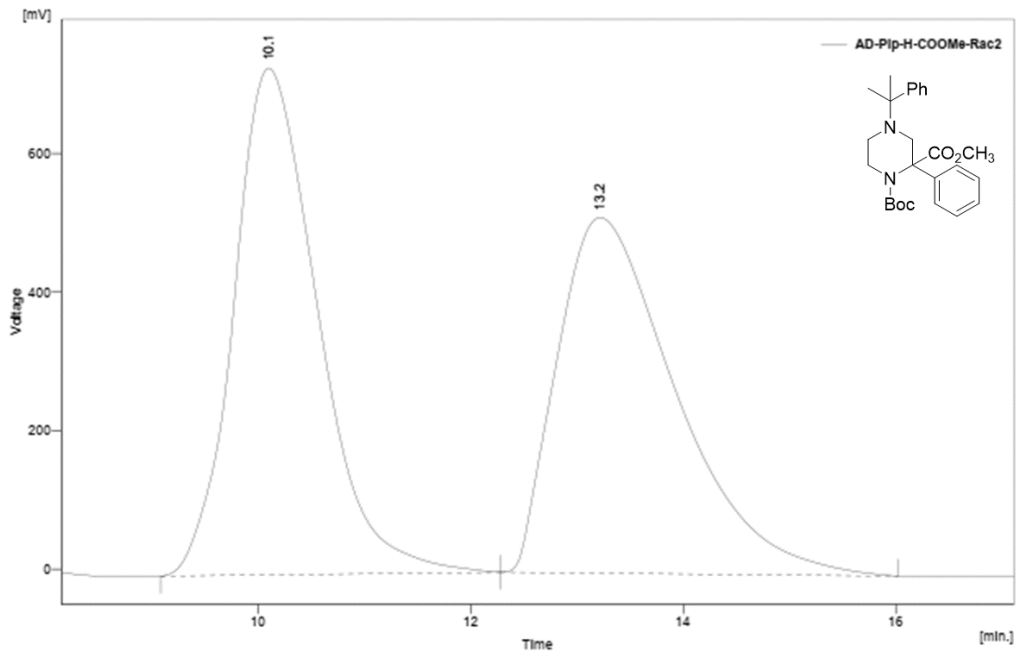

Result Table - Calculation Method Uncal

|   | Reten. Time [min] | Area [mV.s] | Height [mV] | Area [%] | Height [%] | W05 [min] |
|---|-------------------|-------------|-------------|----------|------------|-----------|
| 1 | 10.100            | 39960.034   | 731.340     | 50.1     | 58.8       | 0.82      |
| 2 | 13.217            | 39748.166   | 513.423     | 49.9     | 41.2       | 1.20      |
|   | Total             | 79708.200   | 1244.763    | 100.0    | 100.0      |           |

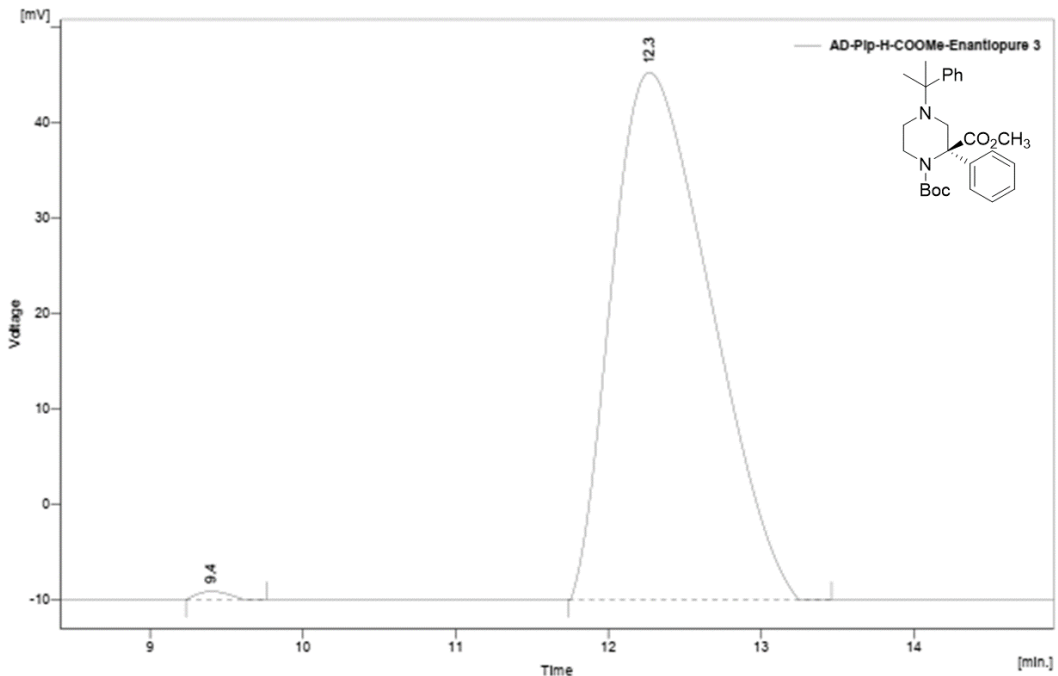

Result Table - Calculation Method Uncal

|   | Reten. Time [min] | Area [mV.s] | Height [mV] | Area [%] | Height [%] | W05 [min] |
|---|-------------------|-------------|-------------|----------|------------|-----------|
| 1 | 9.397             | 12.061      | 0.859       | 0.5      | 1.5        | 0.25      |
| 2 | 12.267            | 2457.651    | 55.180      | 99.5     | 98.5       | 0.73      |
|   | Total             | 2469.712    | 56.039      | 100.0    | 100.0      |           |

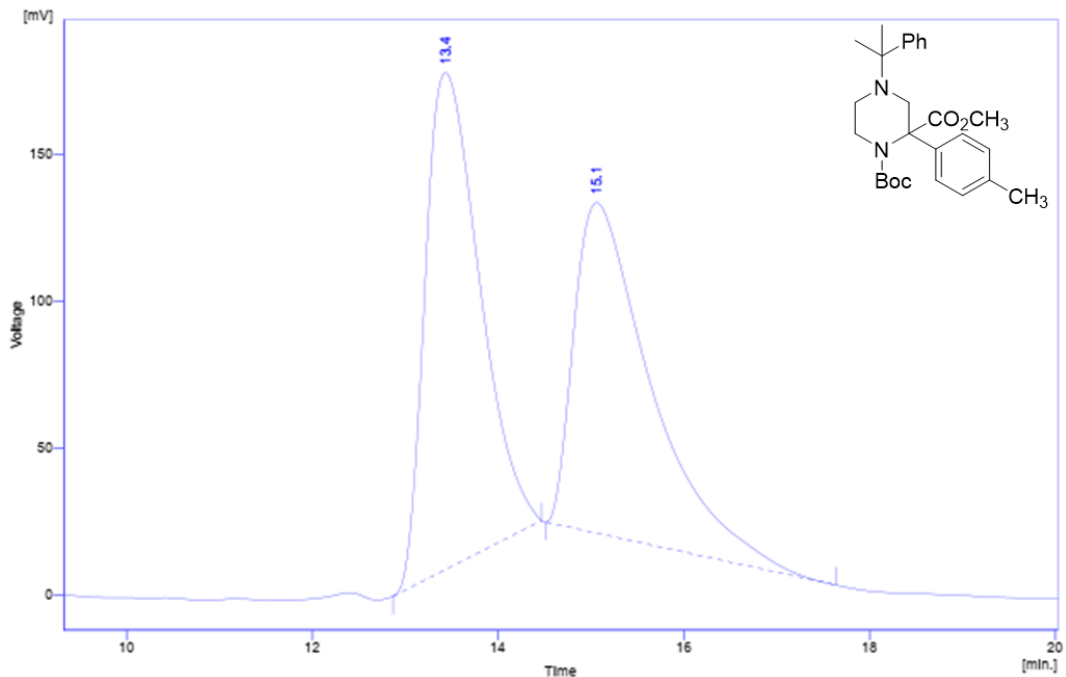

Result Table - Calculation Method Uncal

|       | Reten. Time [min] | Area [mV.s] | Height [mV] | Area [%] | Height [%] | W05 [min] |
|-------|-------------------|-------------|-------------|----------|------------|-----------|
| 1     | 13.433            | 6905.849    | 169.036     | 51.5     | 60.0       | 0.66      |
| 2     | 15.060            | 6510.181    | 112.460     | 48.5     | 40.0       | 0.82      |
| Total |                   | 13416.030   | 281.496     | 100.0    | 100.0      |           |

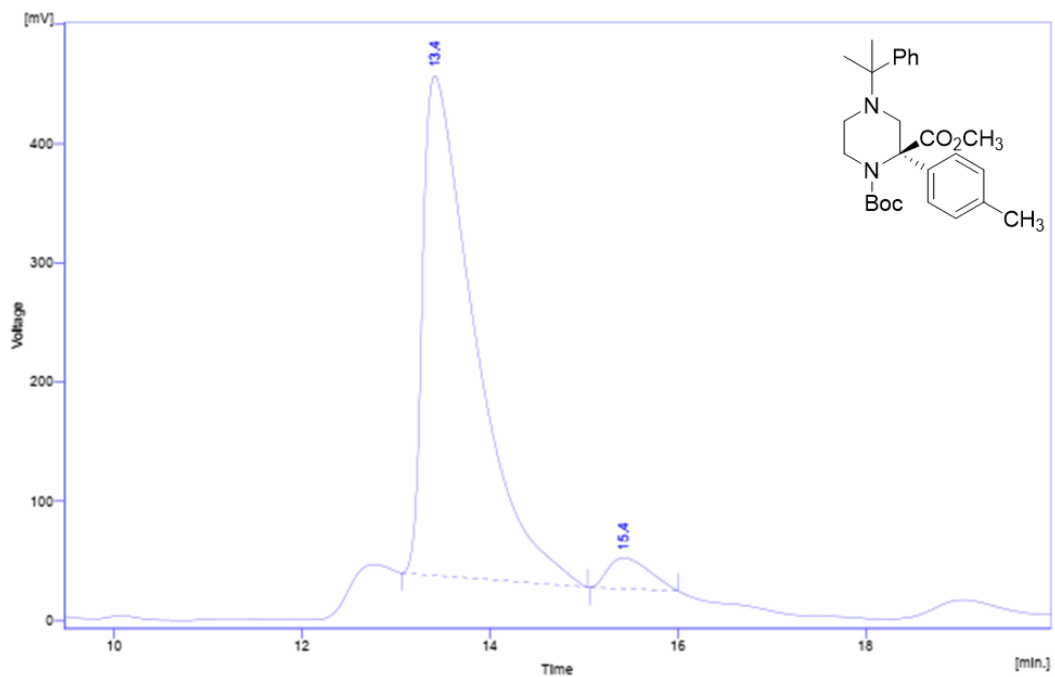

Result Table - Calculation Method Uncal

|       | Reten. Time [min] | Area [mV.s] | Height [mV] | Area [%] | Height [%] | W05 [min] |
|-------|-------------------|-------------|-------------|----------|------------|-----------|
| 1     | 13.413            | 16074.727   | 419.222     | 95.3     | 94.2       | 0.56      |
| 2     | 15.423            | 790.206     | 25.835      | 4.7      | 5.8        | 0.50      |
| Total |                   | 16864.932   | 445.057     | 100.0    | 100.0      |           |

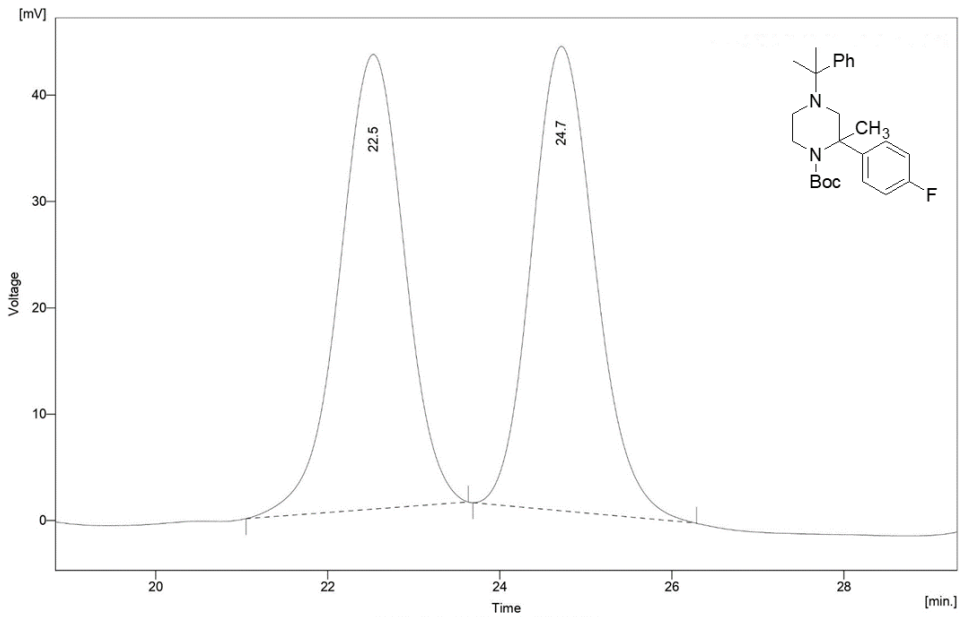

Result Table - Calculation Method Uncal

|       | Reten. Time [min] | Area [mV.s] | Height [mV] | Area [%] | Height [%] | W05 [min] |
|-------|-------------------|-------------|-------------|----------|------------|-----------|
| 1     | 22.530            | 2236.886    | 42.764      | 49.9     | 49.5       | 0.81      |
| 2     | 24.713            | 2246.244    | 43.681      | 50.1     | 50.5       | 0.79      |
| Total |                   | 4483.130    | 86.445      | 100.0    | 100.0      |           |

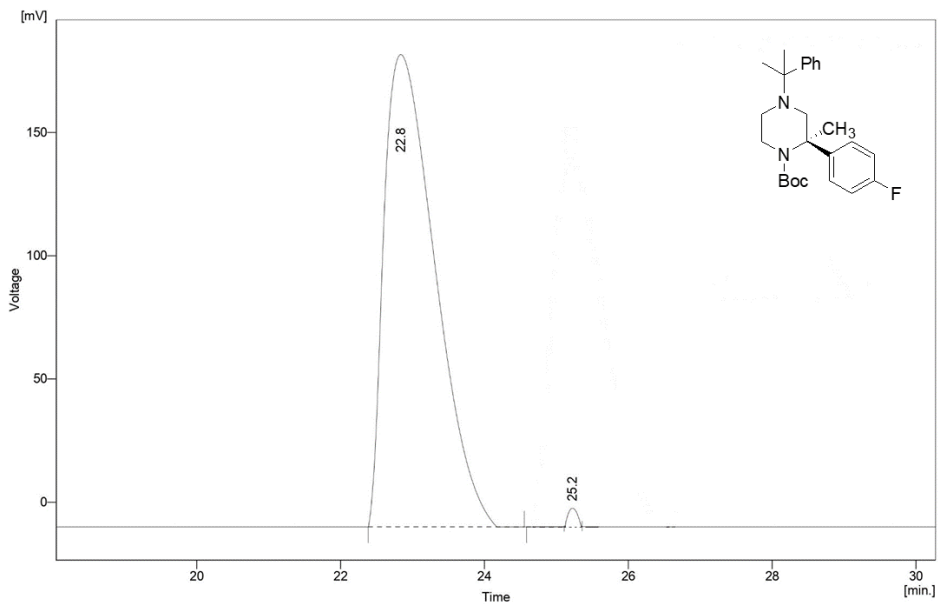

Result Table - Calculation Method Uncal

|       | Reten. Time [min] | Area [mV.s] | Height [mV] | Area [%] | Height [%] | W05 [min] |
|-------|-------------------|-------------|-------------|----------|------------|-----------|
| 1     | 22.837            | 9419.386    | 191.550     | 96.0     | 91.5       | 0.79      |
| 2     | 25.207            | 7401.280    | 148.881     | 4.0      | 8.5        | 0.80      |
| Total |                   | 16820.666   | 340.431     | 100.0    | 100.0      |           |



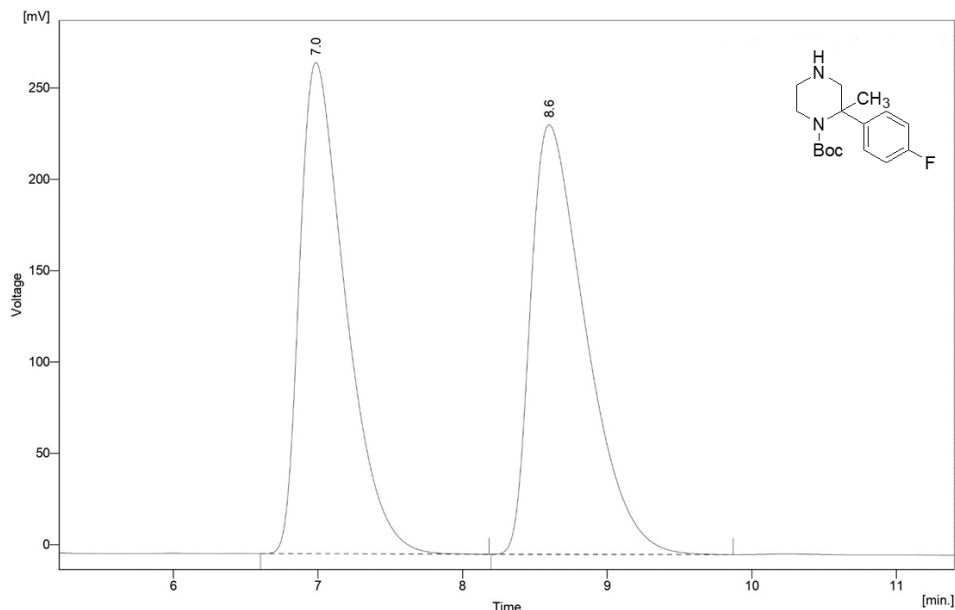

Result Table - Calculation Method Uncal

|   | Reten. Time [min] | Area [mV.s] | Height [mV] | Area [%] | Height [%] | W05 [min] |
|---|-------------------|-------------|-------------|----------|------------|-----------|
| 1 | 6.987             | 5935.376    | 268.932     | 48.8     | 53.3       | 0.34      |
| 2 | 8.600             | 6237.506    | 235.203     | 51.2     | 46.7       | 0.41      |
|   | Total             | 12172.883   | 504.135     | 100.0    | 100.0      |           |

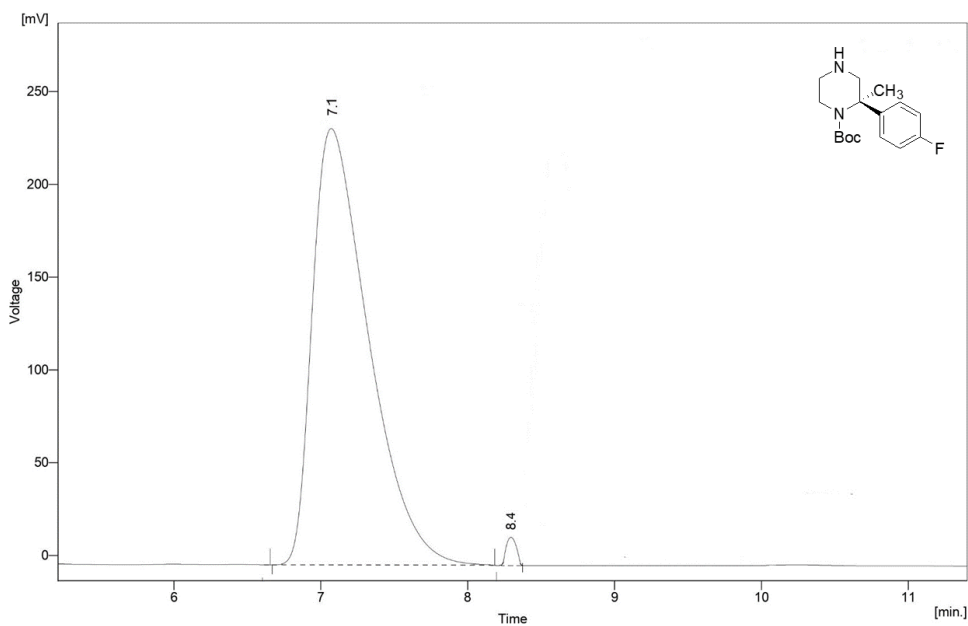

Result Table - Calculation Method Uncal

|   | Reten. Time [min] | Area [mV.s] | Height [mV] | Area [%] | Height [%] | W05 [min] |
|---|-------------------|-------------|-------------|----------|------------|-----------|
| 1 | 6.987             | 5935.376    | 268.932     | 93.8     | 93.1       | 0.34      |
| 2 | 8.600             | 6237.506    | 235.203     | 6.2      | 6.9        | 0.41      |
|   | Total             | 12172.883   | 504.135     | 100.0    | 100.0      |           |

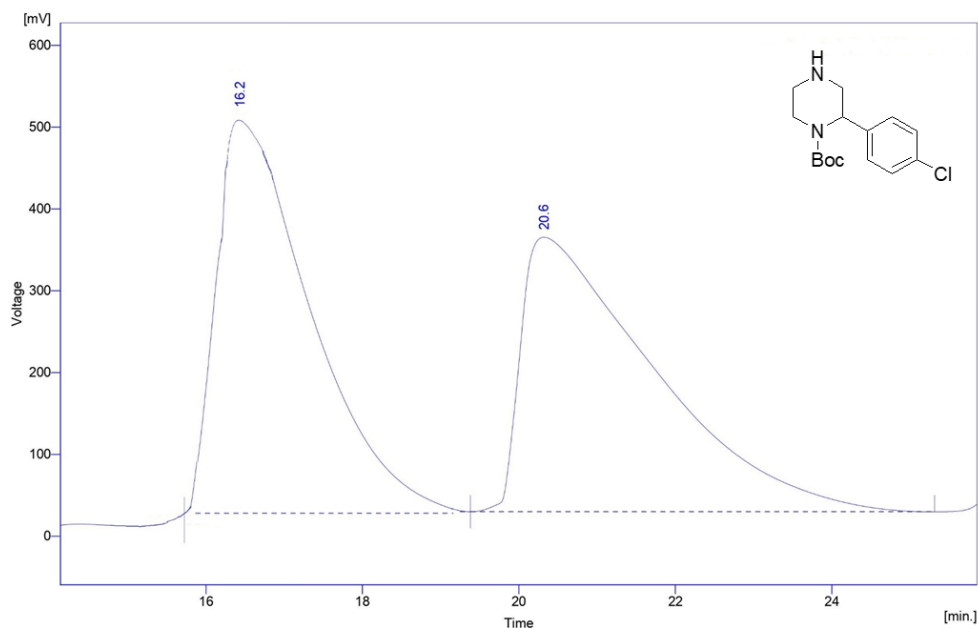

Result Table - Calculation Method Uncal

|   | Reten. Time [min] | Area [mV.s] | Height [mV] | Area [%] | Height [%] | W05 [min] |
|---|-------------------|-------------|-------------|----------|------------|-----------|
| 1 | 16.437            | 38848.456   | 545.558     | 49.6     | 61.9       | 1.07      |
| 2 | 20.323            | 39549.285   | 335.598     | 50.4     | 38.1       | 1.81      |
|   | Total             | 78397.742   | 881.156     | 100.0    | 100.0      |           |

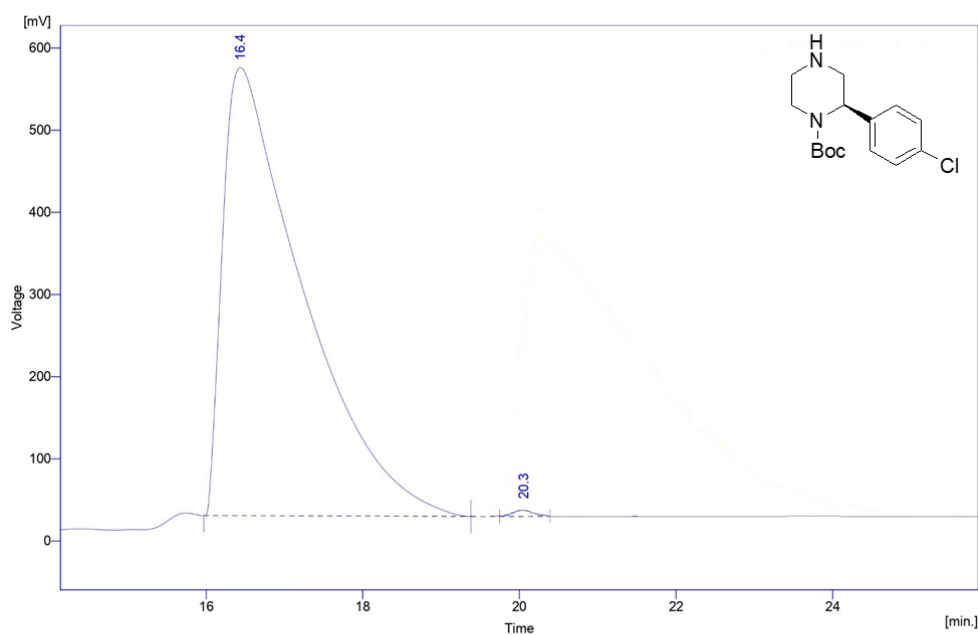

Result Table - Calculation Method Uncal

|   | Reten. Time [min] | Area [mV.s] | Height [mV] | Area [%] | Height [%] | W05 [min] |
|---|-------------------|-------------|-------------|----------|------------|-----------|
| 1 | 16.437            | 38848.456   | 545.558     | 98.6     | 97.7       | 1.07      |
| 2 | 20.323            | 39549.285   | 335.598     | 1.4      | 2.3        | 1.81      |
|   | Total             | 78397.742   | 881.156     | 100.0    | 100.0      |           |

## 6. DFT calculations

All calculations on *tert*-butyl 2-phenyl-4-(2-phenylpropan-2-yl)piperazine-1-carboxylate **2g** were performed using density functional theory, employing the B3LYP<sup>9</sup> functional as implemented in the D.01 version of Gaussian 09.<sup>10</sup> Calculations included dispersion corrections using the GD3-BJ<sup>11</sup> method. Calculations used the def2TZVP<sup>12</sup> basis set. Solvent was included *via* the PCM method<sup>13,14</sup> as implemented in Gaussian with the default parameters for THF. Calculations were performed at 298 K and 195 K.

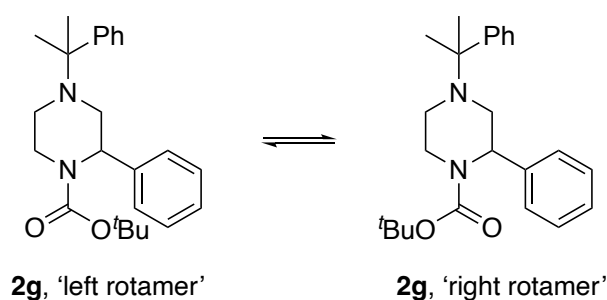

The rotamers of piperazine **2g** were investigated, where the carbonyl of the Boc group could be pointing in the direction away from the phenyl group at C-2 [Left Rotamer] or towards the phenyl group at C-2 [Right Rotamer]. Comparing the axial and equatorial conformations the lower energy structures were found to be when the phenyl group at C-2 occupied an axial conformation.

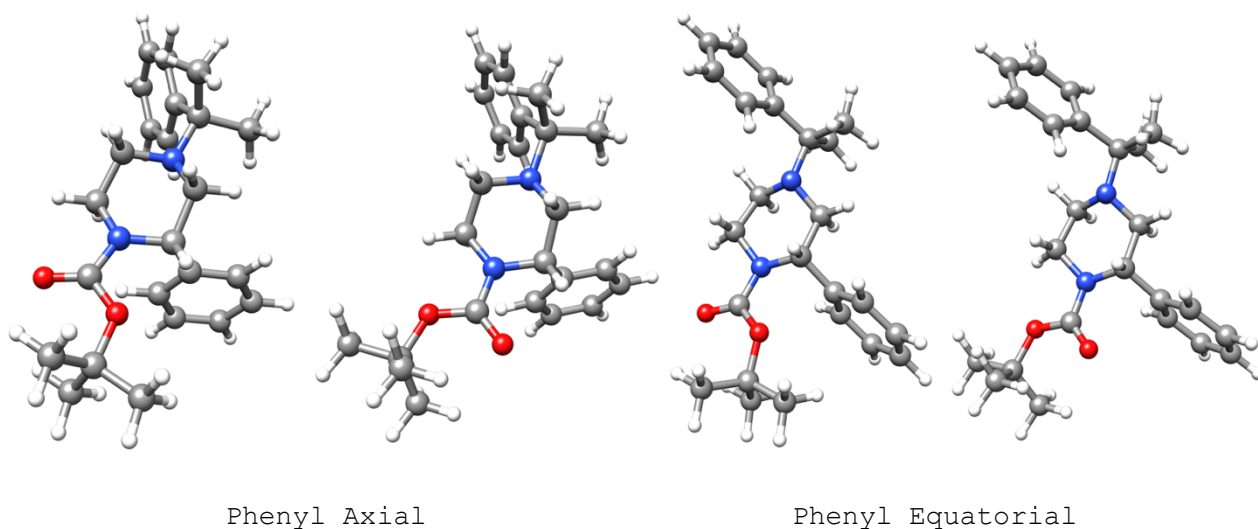

Comparing the two rotamers, where the phenyl group at C-2 was axial, the lower energy rotamer was the left rotamer. At 195 K the difference in Gibbs energy between the two rotamers was calculated to be ~165 J/mol. This corresponded to a rotamer ratio of 53:47 in preference of the left rotamer.

The transition states for the clockwise and anticlockwise rotation of the Boc group were then investigated for both sets of rotamers with the different conformations of the C-2 phenyl group. The lower energy transition states were found to be when the phenyl group adopted

an equatorial position. Closer analysis of the two transition states in which the phenyl group was equatorial found that the clockwise rotation of Boc group was lower in energy.

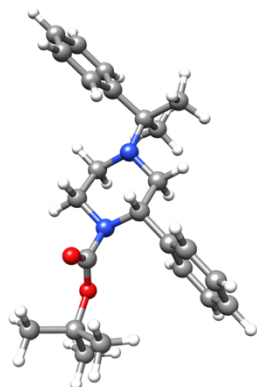

Phenyl Equatorial Clockwise Transition

The activation parameters for the Boc rotation at 195 K were calculated to give the following values:

$$\Delta G^\ddagger \approx 50.2 \text{ kJ/mol}$$

$$\Delta H^\ddagger \approx 46.1 \text{ kJ/mol}$$

$$\Delta S^\ddagger \approx -20.9 \text{ J/mol}\cdot\text{K}$$

The following pages show the DFT data for the rotamers and transition states:

Left Rotamer Axial

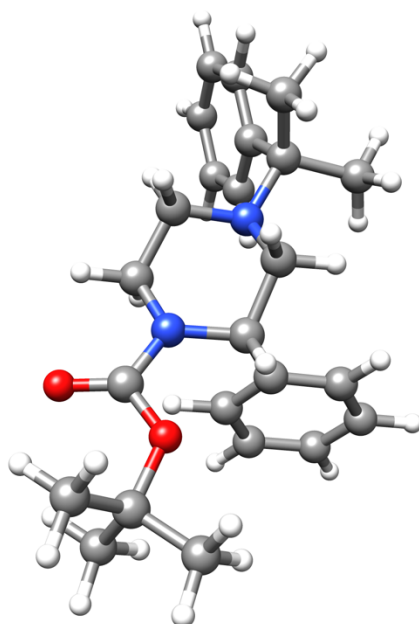

Route : # opt freq b3lyp scrf=(solvent=thf) geom=connectivity def2tzvp  
empiricaldispersion=gd3bj int=ultrafine pop=(regular,mk)

SMILES : CC(C)(C)OC(=O)N2CCN(C(C)(C)c1ccccc1)CC2c3ccccc3

Formula : C<sub>24</sub>H<sub>32</sub>N<sub>2</sub>O<sub>2</sub>

Charge : 0

Multiplicity : 1

Dipole : 3.4347 Debye

Energy : -1194.38643726 a.u.

Gibbs Energy : -1193.925156 a.u.

Number of imaginary frequencies : 0

Cartesian Coordinates (XYZ format)

60

|   |             |             |             |
|---|-------------|-------------|-------------|
| C | -1.15452000 | -1.70811700 | -0.17176000 |
| C | 0.07325300  | -1.38702600 | -1.00242500 |
| C | 0.92574900  | -0.03148300 | 0.91809400  |
| C | -0.35595500 | -0.44565800 | 1.65206000  |
| H | 0.38196400  | -2.25255700 | -1.58104200 |
| H | -0.98063100 | -2.63996800 | 0.39006100  |
| H | -1.99249500 | -1.87656900 | -0.84587800 |
| H | 1.73941600  | -0.11525900 | 1.63531100  |
| H | -0.14506000 | -1.38088800 | 2.19621500  |
| H | -0.58715900 | 0.31371900  | 2.38967300  |
| H | -0.17321200 | -0.58101800 | -1.70042200 |
| N | 1.19488700  | -0.99211900 | -0.15218000 |
| N | -1.45092300 | -0.59296700 | 0.71494400  |
| C | -2.82745500 | -0.57860300 | 1.26241800  |

|   |             |             |             |
|---|-------------|-------------|-------------|
| C | -3.13009100 | -1.83676500 | 2.09193900  |
| H | -4.10148400 | -1.76459400 | 2.58106600  |
| H | -3.12366800 | -2.74024200 | 1.48257700  |
| H | -2.37845100 | -1.94752000 | 2.87422900  |
| C | -3.01551000 | 0.65718500  | 2.16140500  |
| H | -2.64919200 | 1.55470800  | 1.66321700  |
| H | -4.07633900 | 0.78823500  | 2.37229700  |
| H | -2.50066000 | 0.54790000  | 3.11608600  |
| C | -3.78129300 | -0.40997200 | 0.07345500  |
| C | -4.95717800 | -1.14386100 | -0.05981400 |
| C | -3.49082200 | 0.55337600  | -0.89688100 |
| C | -5.81969500 | -0.92633100 | -1.13221100 |
| H | -5.21470800 | -1.89881100 | 0.66900400  |
| C | -4.34675400 | 0.77311800  | -1.96639500 |
| H | -2.57190000 | 1.11666600  | -0.81287200 |
| C | -5.51890300 | 0.03177200  | -2.09021900 |
| H | -6.72575800 | -1.51312500 | -1.21618600 |
| H | -4.09823300 | 1.52258300  | -2.70743800 |
| H | -6.18661900 | 0.19910700  | -2.92556500 |
| C | 0.88496600  | 1.41357400  | 0.43242800  |
| C | 0.59873000  | 2.43629200  | 1.33866900  |
| C | 1.16990700  | 1.76320300  | -0.88448700 |
| C | 0.57654300  | 3.76516300  | 0.93680600  |
| H | 0.39684000  | 2.19873500  | 2.37543700  |
| C | 1.14730800  | 3.09303300  | -1.29337800 |
| H | 1.41678800  | 0.99816400  | -1.60627000 |
| C | 0.84569000  | 4.10030200  | -0.38631400 |
| H | 0.35116200  | 4.53992200  | 1.65858100  |
| H | 1.36775700  | 3.33826000  | -2.32453200 |
| H | 0.82600700  | 5.13491700  | -0.70319400 |
| C | 2.45936200  | -1.26229500 | -0.58677300 |
| O | 2.70843600  | -1.92405400 | -1.58171300 |
| O | 3.38138800  | -0.71691800 | 0.22718900  |
| C | 4.81675900  | -0.75786300 | -0.08684100 |
| C | 5.31877100  | -2.19708900 | -0.08136800 |
| H | 4.89184800  | -2.76571300 | -0.90292400 |
| H | 6.40569300  | -2.19913000 | -0.17714300 |
| H | 5.05921500  | -2.68316300 | 0.86041400  |
| C | 5.42738400  | 0.02912200  | 1.06615400  |
| H | 5.03446700  | 1.04608600  | 1.08483900  |
| H | 5.20115500  | -0.45013900 | 2.01924100  |
| H | 6.51034000  | 0.07618500  | 0.95001700  |
| C | 5.07755300  | -0.05225900 | -1.41301900 |
| H | 6.15375900  | 0.04223600  | -1.56442700 |
| H | 4.65461600  | -0.60771100 | -2.24594600 |
| H | 4.64540000  | 0.94943700  | -1.39684900 |

### Frequencies

| Mode | IR frequency | IR intensity | Raman intensity |
|------|--------------|--------------|-----------------|
| 1    | 16.30880000  | 0.29740000   | 0.00000000      |
| 2    | 25.79900000  | 0.00770000   | 0.00000000      |
| 3    | 29.82410000  | 0.31890000   | 0.00000000      |
| 4    | 37.80720000  | 0.03400000   | 0.00000000      |
| 5    | 39.86080000  | 0.11870000   | 0.00000000      |

|    |              |             |            |
|----|--------------|-------------|------------|
| 6  | 49.27010000  | 0.29750000  | 0.00000000 |
| 7  | 63.86680000  | 0.91880000  | 0.00000000 |
| 8  | 74.39300000  | 2.80820000  | 0.00000000 |
| 9  | 90.70150000  | 0.55650000  | 0.00000000 |
| 10 | 116.99960000 | 0.67460000  | 0.00000000 |
| 11 | 130.89640000 | 0.49700000  | 0.00000000 |
| 12 | 169.49480000 | 1.01940000  | 0.00000000 |
| 13 | 174.15550000 | 1.74810000  | 0.00000000 |
| 14 | 194.42220000 | 3.26720000  | 0.00000000 |
| 15 | 208.47960000 | 0.14250000  | 0.00000000 |
| 16 | 217.12330000 | 2.37210000  | 0.00000000 |
| 17 | 220.26140000 | 0.64380000  | 0.00000000 |
| 18 | 245.73340000 | 0.02960000  | 0.00000000 |
| 19 | 259.93110000 | 2.01910000  | 0.00000000 |
| 20 | 272.96660000 | 0.03060000  | 0.00000000 |
| 21 | 278.00360000 | 4.11230000  | 0.00000000 |
| 22 | 292.26400000 | 0.63660000  | 0.00000000 |
| 23 | 300.48920000 | 1.12720000  | 0.00000000 |
| 24 | 310.96420000 | 3.38280000  | 0.00000000 |
| 25 | 323.26530000 | 0.35820000  | 0.00000000 |
| 26 | 330.61400000 | 13.88790000 | 0.00000000 |
| 27 | 333.47500000 | 1.78160000  | 0.00000000 |
| 28 | 350.90830000 | 0.54130000  | 0.00000000 |
| 29 | 351.87350000 | 1.65790000  | 0.00000000 |
| 30 | 363.61550000 | 5.04180000  | 0.00000000 |
| 31 | 393.58140000 | 6.95390000  | 0.00000000 |
| 32 | 417.67330000 | 0.08020000  | 0.00000000 |
| 33 | 419.36900000 | 0.32000000  | 0.00000000 |
| 34 | 429.13510000 | 1.40610000  | 0.00000000 |
| 35 | 432.66730000 | 1.44180000  | 0.00000000 |
| 36 | 460.79780000 | 2.89580000  | 0.00000000 |
| 37 | 464.71770000 | 3.95650000  | 0.00000000 |
| 38 | 481.18490000 | 10.08600000 | 0.00000000 |
| 39 | 491.91100000 | 4.44620000  | 0.00000000 |
| 40 | 521.31930000 | 3.02790000  | 0.00000000 |
| 41 | 536.84600000 | 5.85710000  | 0.00000000 |
| 42 | 568.16510000 | 30.59950000 | 0.00000000 |
| 43 | 579.42210000 | 9.47590000  | 0.00000000 |
| 44 | 622.39310000 | 11.09740000 | 0.00000000 |
| 45 | 636.87140000 | 0.56490000  | 0.00000000 |
| 46 | 638.01980000 | 0.46440000  | 0.00000000 |
| 47 | 657.27070000 | 8.08750000  | 0.00000000 |
| 48 | 712.18000000 | 5.28360000  | 0.00000000 |

|    |               |              |            |
|----|---------------|--------------|------------|
| 49 | 716.97880000  | 78.53800000  | 0.00000000 |
| 50 | 718.58490000  | 46.53950000  | 0.00000000 |
| 51 | 745.81010000  | 39.43620000  | 0.00000000 |
| 52 | 763.25570000  | 1.65960000   | 0.00000000 |
| 53 | 770.67880000  | 12.31020000  | 0.00000000 |
| 54 | 782.48470000  | 31.91240000  | 0.00000000 |
| 55 | 785.59280000  | 34.03320000  | 0.00000000 |
| 56 | 796.96150000  | 11.29090000  | 0.00000000 |
| 57 | 832.15170000  | 17.85820000  | 0.00000000 |
| 58 | 843.30540000  | 11.13050000  | 0.00000000 |
| 59 | 861.90540000  | 0.19740000   | 0.00000000 |
| 60 | 862.44570000  | 0.16390000   | 0.00000000 |
| 61 | 868.19080000  | 45.86870000  | 0.00000000 |
| 62 | 912.15630000  | 6.97080000   | 0.00000000 |
| 63 | 930.19830000  | 0.52880000   | 0.00000000 |
| 64 | 930.50230000  | 0.72510000   | 0.00000000 |
| 65 | 930.99830000  | 0.60770000   | 0.00000000 |
| 66 | 934.19200000  | 1.38470000   | 0.00000000 |
| 67 | 942.09240000  | 12.02050000  | 0.00000000 |
| 68 | 973.75160000  | 0.11490000   | 0.00000000 |
| 69 | 977.00050000  | 90.21600000  | 0.00000000 |
| 70 | 982.79800000  | 0.35460000   | 0.00000000 |
| 71 | 983.66680000  | 3.45800000   | 0.00000000 |
| 72 | 994.95710000  | 34.07800000  | 0.00000000 |
| 73 | 996.03740000  | 2.66520000   | 0.00000000 |
| 74 | 998.85740000  | 3.49790000   | 0.00000000 |
| 75 | 1005.22090000 | 34.62890000  | 0.00000000 |
| 76 | 1022.71870000 | 1.26740000   | 0.00000000 |
| 77 | 1024.98690000 | 0.45610000   | 0.00000000 |
| 78 | 1026.34320000 | 1.79220000   | 0.00000000 |
| 79 | 1032.12610000 | 27.76840000  | 0.00000000 |
| 80 | 1053.79550000 | 17.85250000  | 0.00000000 |
| 81 | 1054.26030000 | 1.03100000   | 0.00000000 |
| 82 | 1057.27960000 | 6.90040000   | 0.00000000 |
| 83 | 1061.13980000 | 0.80770000   | 0.00000000 |
| 84 | 1089.70620000 | 7.22210000   | 0.00000000 |
| 85 | 1101.70530000 | 12.61420000  | 0.00000000 |
| 86 | 1114.26190000 | 12.87060000  | 0.00000000 |
| 87 | 1124.47240000 | 72.15680000  | 0.00000000 |
| 88 | 1130.69810000 | 188.03120000 | 0.00000000 |
| 89 | 1135.97340000 | 74.85090000  | 0.00000000 |
| 90 | 1159.63200000 | 29.68620000  | 0.00000000 |
| 91 | 1180.33130000 | 0.57300000   | 0.00000000 |



|     |               |              |            |
|-----|---------------|--------------|------------|
| 92  | 1181.44020000 | 0.39270000   | 0.00000000 |
| 93  | 1190.79040000 | 272.87500000 | 0.00000000 |
| 94  | 1193.68780000 | 152.07030000 | 0.00000000 |
| 95  | 1198.84510000 | 40.46660000  | 0.00000000 |
| 96  | 1207.10040000 | 3.06820000   | 0.00000000 |
| 97  | 1211.04180000 | 5.89910000   | 0.00000000 |
| 98  | 1213.58130000 | 63.34760000  | 0.00000000 |
| 99  | 1244.96730000 | 9.85860000   | 0.00000000 |
| 100 | 1256.51310000 | 69.04100000  | 0.00000000 |
| 101 | 1269.28760000 | 27.47780000  | 0.00000000 |
| 102 | 1274.36490000 | 121.45790000 | 0.00000000 |
| 103 | 1282.86950000 | 10.70460000  | 0.00000000 |
| 104 | 1307.37340000 | 43.90840000  | 0.00000000 |
| 105 | 1316.05820000 | 84.61650000  | 0.00000000 |
| 106 | 1324.55040000 | 96.55410000  | 0.00000000 |
| 107 | 1330.38090000 | 2.80450000   | 0.00000000 |
| 108 | 1342.94210000 | 68.94960000  | 0.00000000 |
| 109 | 1360.03050000 | 7.03630000   | 0.00000000 |
| 110 | 1361.19740000 | 42.39390000  | 0.00000000 |
| 111 | 1367.73960000 | 71.07350000  | 0.00000000 |
| 112 | 1381.75540000 | 43.47390000  | 0.00000000 |
| 113 | 1397.29760000 | 1.09480000   | 0.00000000 |
| 114 | 1397.46110000 | 41.22850000  | 0.00000000 |
| 115 | 1399.90720000 | 29.83570000  | 0.00000000 |
| 116 | 1413.74370000 | 27.86810000  | 0.00000000 |
| 117 | 1415.49990000 | 8.40130000   | 0.00000000 |
| 118 | 1423.35370000 | 18.30050000  | 0.00000000 |
| 119 | 1429.91370000 | 109.18100000 | 0.00000000 |
| 120 | 1431.00630000 | 270.19010000 | 0.00000000 |
| 121 | 1467.22060000 | 0.39500000   | 0.00000000 |
| 122 | 1479.80000000 | 9.92900000   | 0.00000000 |
| 123 | 1484.24430000 | 16.99970000  | 0.00000000 |
| 124 | 1484.46450000 | 4.15170000   | 0.00000000 |
| 125 | 1484.47960000 | 2.22970000   | 0.00000000 |
| 126 | 1484.64660000 | 0.17620000   | 0.00000000 |
| 127 | 1488.02890000 | 21.28780000  | 0.00000000 |
| 128 | 1491.92390000 | 1.73370000   | 0.00000000 |
| 129 | 1493.44770000 | 0.55670000   | 0.00000000 |
| 130 | 1498.21010000 | 2.14590000   | 0.00000000 |
| 131 | 1499.33060000 | 13.67760000  | 0.00000000 |
| 132 | 1503.67800000 | 13.33500000  | 0.00000000 |
| 133 | 1508.57910000 | 11.12760000  | 0.00000000 |
| 134 | 1511.44100000 | 13.14400000  | 0.00000000 |

|     |               |              |            |
|-----|---------------|--------------|------------|
| 135 | 1517.25540000 | 28.75810000  | 0.00000000 |
| 136 | 1532.04750000 | 20.36240000  | 0.00000000 |
| 137 | 1535.37740000 | 17.51500000  | 0.00000000 |
| 138 | 1624.28450000 | 0.64580000   | 0.00000000 |
| 139 | 1626.99330000 | 1.62620000   | 0.00000000 |
| 140 | 1644.65520000 | 7.98700000   | 0.00000000 |
| 141 | 1647.07240000 | 13.91280000  | 0.00000000 |
| 142 | 1704.50350000 | 711.77600000 | 0.00000000 |
| 143 | 2925.01270000 | 92.96430000  | 0.00000000 |
| 144 | 2932.11190000 | 167.57250000 | 0.00000000 |
| 145 | 3021.30390000 | 55.94220000  | 0.00000000 |
| 146 | 3040.71810000 | 16.05450000  | 0.00000000 |
| 147 | 3042.24430000 | 27.17530000  | 0.00000000 |
| 148 | 3043.09440000 | 38.85820000  | 0.00000000 |
| 149 | 3047.35860000 | 28.78550000  | 0.00000000 |
| 150 | 3049.94840000 | 21.27390000  | 0.00000000 |
| 151 | 3099.07220000 | 8.93780000   | 0.00000000 |
| 152 | 3101.65940000 | 12.48270000  | 0.00000000 |
| 153 | 3103.89060000 | 19.97230000  | 0.00000000 |
| 154 | 3104.42600000 | 21.11650000  | 0.00000000 |
| 155 | 3105.14620000 | 3.96360000   | 0.00000000 |
| 156 | 3109.54260000 | 87.59150000  | 0.00000000 |
| 157 | 3111.03550000 | 45.73250000  | 0.00000000 |
| 158 | 3113.53060000 | 33.13710000  | 0.00000000 |
| 159 | 3117.00950000 | 66.30440000  | 0.00000000 |
| 160 | 3119.47370000 | 32.50760000  | 0.00000000 |
| 161 | 3138.23860000 | 14.49170000  | 0.00000000 |
| 162 | 3143.17840000 | 4.81680000   | 0.00000000 |
| 163 | 3147.68260000 | 21.43570000  | 0.00000000 |
| 164 | 3158.06920000 | 19.23890000  | 0.00000000 |
| 165 | 3166.72330000 | 0.48080000   | 0.00000000 |
| 166 | 3167.90390000 | 3.47830000   | 0.00000000 |
| 167 | 3174.37600000 | 1.21680000   | 0.00000000 |
| 168 | 3175.05020000 | 18.02930000  | 0.00000000 |
| 169 | 3182.99340000 | 37.25970000  | 0.00000000 |
| 170 | 3189.13660000 | 34.14940000  | 0.00000000 |
| 171 | 3194.00170000 | 32.77840000  | 0.00000000 |
| 172 | 3200.31450000 | 14.64760000  | 0.00000000 |
| 173 | 3204.39920000 | 11.68330000  | 0.00000000 |
| 174 | 3205.79690000 | 9.72200000   | 0.00000000 |

### Right Rotamer Axial

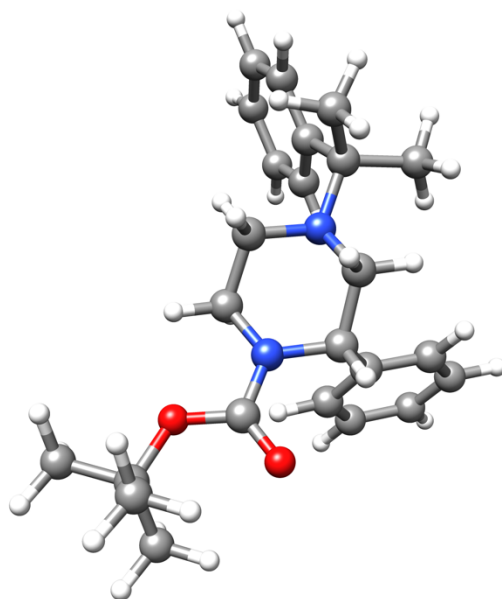

Route : # opt freq b3lyp scrf=(solvent=thf) geom=connectivity def2tzvp  
empiricaldispersion=gd3bj int=ultrafine pop=(regular,mk)  
SMILES : CC(C)(C)OC(=O)N2CCN(C(C)(C)C1CCCCC1)CC2C3CCCCC3  
Formula : C<sub>24</sub>H<sub>32</sub>N<sub>2</sub>O<sub>2</sub>  
Charge : 0  
Multiplicity : 1  
Dipole : 2.9218 Debye  
Energy : -1194.38576012 a.u.  
Gibbs Energy : -1193.925528 a.u.  
Number of imaginary frequencies : 0

### Cartesian Coordinates (XYZ format)

60

|   |             |             |             |
|---|-------------|-------------|-------------|
| C | 0.65296000  | -1.50775200 | -0.34360600 |
| C | -0.59771800 | -1.04485800 | 0.38441400  |
| C | -0.75140000 | 0.84411100  | -1.23089400 |
| C | 0.49584800  | 0.25974100  | -1.90309800 |
| H | -1.17858700 | -1.90055100 | 0.70949300  |
| H | 0.36906300  | -2.23762300 | -1.11911400 |
| H | 1.29978100  | -2.01459800 | 0.37075400  |
| H | -1.43853500 | 1.15357500  | -2.01728300 |
| H | 0.16018700  | -0.45398400 | -2.67307300 |
| H | 1.02453000  | 1.05719100  | -2.41107200 |
| H | -0.30079000 | -0.47384800 | 1.26894900  |
| N | -1.42824700 | -0.21681000 | -0.48894800 |
| N | 1.34899000  | -0.36317100 | -0.91005300 |
| C | 2.76347400  | -0.60980400 | -1.27220100 |
| C | 2.90383400  | -1.72845100 | -2.31703500 |
| H | 3.93419700  | -1.82341500 | -2.65983200 |
| H | 2.58574000  | -2.69523600 | -1.92743500 |
| H | 2.29046600  | -1.49296500 | -3.18743900 |
| C | 3.38564600  | 0.67588800  | -1.84697000 |

|   |             |             |             |
|---|-------------|-------------|-------------|
| H | 3.16056200  | 1.53084800  | -1.20964100 |
| H | 4.46760000  | 0.55812300  | -1.89643300 |
| H | 3.02989000  | 0.88346400  | -2.85632800 |
| C | 3.51154000  | -0.91824400 | 0.03071600  |
| C | 4.44275100  | -1.94770300 | 0.14031100  |
| C | 3.29175900  | -0.10494600 | 1.14634100  |
| C | 5.13549600  | -2.16334400 | 1.32988400  |
| H | 4.63804200  | -2.59841500 | -0.69988800 |
| C | 3.97944400  | -0.31615600 | 2.33264900  |
| H | 2.55831500  | 0.68657100  | 1.07794600  |
| C | 4.90725500  | -1.34990800 | 2.43095600  |
| H | 5.85163700  | -2.97309300 | 1.39148100  |
| H | 3.79004400  | 0.32540900  | 3.18420700  |
| H | 5.44284900  | -1.51833900 | 3.35639500  |
| C | -0.44439200 | 2.06595500  | -0.36979500 |
| C | 0.32912000  | 3.10769800  | -0.88522300 |
| C | -0.95597000 | 2.20420100  | 0.91791000  |
| C | 0.60158500  | 4.24050600  | -0.12961500 |
| H | 0.72294100  | 3.04480400  | -1.89104200 |
| C | -0.68465900 | 3.33587700  | 1.68023300  |
| H | -1.57673500 | 1.42525900  | 1.33702600  |
| C | 0.10036200  | 4.35778100  | 1.16251800  |
| H | 1.20558400  | 5.03339200  | -0.55219800 |
| H | -1.09086800 | 3.41615900  | 2.68055900  |
| H | 0.31457800  | 5.23797900  | 1.75465600  |
| C | -2.79078900 | -0.23265600 | -0.48060800 |
| O | -3.48052000 | 0.51822000  | -1.15229100 |
| O | -3.26742200 | -1.17637800 | 0.35275200  |
| C | -4.71058100 | -1.41039000 | 0.51378700  |
| C | -5.38272300 | -0.16591900 | 1.08286300  |
| H | -5.36380300 | 0.65337800  | 0.36959000  |
| H | -6.42057400 | -0.39784100 | 1.32664000  |
| H | -4.87996500 | 0.14833400  | 1.99888700  |
| C | -4.74840000 | -2.54902300 | 1.52569500  |
| H | -4.23211200 | -3.42658700 | 1.13516000  |
| H | -4.26961000 | -2.24875900 | 2.45828000  |
| H | -5.78246700 | -2.82094400 | 1.73845300  |
| C | -5.32306900 | -1.85058700 | -0.81098900 |
| H | -6.35764800 | -2.15461700 | -0.64506700 |
| H | -5.30685400 | -1.04491500 | -1.53988900 |
| H | -4.77736000 | -2.70572600 | -1.21286900 |

### Frequencies

| Mode | IR frequency | IR intensity | Raman intensity |
|------|--------------|--------------|-----------------|
| 1    | 13.90170000  | 0.09960000   | 0.00000000      |
| 2    | 20.16300000  | 0.09900000   | 0.00000000      |
| 3    | 26.60190000  | 0.67060000   | 0.00000000      |
| 4    | 36.78290000  | 0.03000000   | 0.00000000      |
| 5    | 37.30350000  | 0.23230000   | 0.00000000      |
| 6    | 44.37680000  | 0.19200000   | 0.00000000      |
| 7    | 59.33270000  | 0.94960000   | 0.00000000      |
| 8    | 68.25450000  | 3.10980000   | 0.00000000      |
| 9    | 96.17110000  | 0.92050000   | 0.00000000      |

|    |              |             |            |
|----|--------------|-------------|------------|
| 10 | 117.21730000 | 0.50720000  | 0.00000000 |
| 11 | 129.34550000 | 1.48140000  | 0.00000000 |
| 12 | 166.80670000 | 1.99770000  | 0.00000000 |
| 13 | 175.18360000 | 2.58330000  | 0.00000000 |
| 14 | 198.03620000 | 1.05810000  | 0.00000000 |
| 15 | 204.97930000 | 0.16610000  | 0.00000000 |
| 16 | 215.54460000 | 0.92680000  | 0.00000000 |
| 17 | 224.23550000 | 1.71030000  | 0.00000000 |
| 18 | 245.26800000 | 0.29260000  | 0.00000000 |
| 19 | 264.18890000 | 1.89120000  | 0.00000000 |
| 20 | 270.21610000 | 3.72990000  | 0.00000000 |
| 21 | 272.71170000 | 0.66350000  | 0.00000000 |
| 22 | 282.90910000 | 1.27170000  | 0.00000000 |
| 23 | 292.04680000 | 1.24010000  | 0.00000000 |
| 24 | 305.37890000 | 0.57510000  | 0.00000000 |
| 25 | 322.27800000 | 1.13890000  | 0.00000000 |
| 26 | 330.60960000 | 11.13810000 | 0.00000000 |
| 27 | 338.07030000 | 5.92900000  | 0.00000000 |
| 28 | 349.07970000 | 2.12800000  | 0.00000000 |
| 29 | 353.51080000 | 0.75910000  | 0.00000000 |
| 30 | 357.20740000 | 2.66580000  | 0.00000000 |
| 31 | 411.49820000 | 2.94960000  | 0.00000000 |
| 32 | 417.13910000 | 0.14600000  | 0.00000000 |
| 33 | 418.52930000 | 0.56550000  | 0.00000000 |
| 34 | 425.32010000 | 1.58350000  | 0.00000000 |
| 35 | 446.42640000 | 9.51560000  | 0.00000000 |
| 36 | 460.56790000 | 2.84950000  | 0.00000000 |
| 37 | 462.60240000 | 4.51040000  | 0.00000000 |
| 38 | 477.11630000 | 7.78380000  | 0.00000000 |
| 39 | 491.15220000 | 4.43050000  | 0.00000000 |
| 40 | 524.19640000 | 3.43310000  | 0.00000000 |
| 41 | 557.57410000 | 32.64750000 | 0.00000000 |
| 42 | 561.44790000 | 2.28730000  | 0.00000000 |
| 43 | 581.38000000 | 10.29980000 | 0.00000000 |
| 44 | 623.07040000 | 12.71370000 | 0.00000000 |
| 45 | 636.35540000 | 4.10010000  | 0.00000000 |
| 46 | 638.15060000 | 0.71410000  | 0.00000000 |
| 47 | 642.90320000 | 6.80910000  | 0.00000000 |
| 48 | 705.89930000 | 1.76000000  | 0.00000000 |
| 49 | 715.88100000 | 78.42330000 | 0.00000000 |
| 50 | 716.54030000 | 44.29490000 | 0.00000000 |
| 51 | 744.50280000 | 37.64800000 | 0.00000000 |
| 52 | 747.89830000 | 8.53330000  | 0.00000000 |

|    |               |              |            |
|----|---------------|--------------|------------|
| 53 | 779.57160000  | 40.13690000  | 0.00000000 |
| 54 | 780.98100000  | 19.12860000  | 0.00000000 |
| 55 | 782.67460000  | 12.45030000  | 0.00000000 |
| 56 | 795.94410000  | 12.70420000  | 0.00000000 |
| 57 | 830.68690000  | 4.98730000   | 0.00000000 |
| 58 | 841.51040000  | 3.77240000   | 0.00000000 |
| 59 | 860.39280000  | 0.35490000   | 0.00000000 |
| 60 | 861.83360000  | 0.19100000   | 0.00000000 |
| 61 | 871.53630000  | 65.80030000  | 0.00000000 |
| 62 | 911.37360000  | 5.81850000   | 0.00000000 |
| 63 | 928.66990000  | 1.46730000   | 0.00000000 |
| 64 | 930.53030000  | 0.06580000   | 0.00000000 |
| 65 | 931.05410000  | 0.45970000   | 0.00000000 |
| 66 | 933.97940000  | 1.62770000   | 0.00000000 |
| 67 | 941.57020000  | 9.38600000   | 0.00000000 |
| 68 | 972.15530000  | 0.09650000   | 0.00000000 |
| 69 | 976.60140000  | 102.78750000 | 0.00000000 |
| 70 | 981.39610000  | 8.87590000   | 0.00000000 |
| 71 | 982.35490000  | 1.20350000   | 0.00000000 |
| 72 | 992.57830000  | 4.94940000   | 0.00000000 |
| 73 | 993.72190000  | 19.15220000  | 0.00000000 |
| 74 | 997.32190000  | 7.65130000   | 0.00000000 |
| 75 | 1002.87590000 | 51.28740000  | 0.00000000 |
| 76 | 1022.39430000 | 0.31250000   | 0.00000000 |
| 77 | 1025.03560000 | 0.56730000   | 0.00000000 |
| 78 | 1026.14880000 | 0.24610000   | 0.00000000 |
| 79 | 1030.78070000 | 35.14670000  | 0.00000000 |
| 80 | 1052.85890000 | 7.92900000   | 0.00000000 |
| 81 | 1052.86820000 | 10.23190000  | 0.00000000 |
| 82 | 1057.55840000 | 10.24120000  | 0.00000000 |
| 83 | 1060.70920000 | 1.85680000   | 0.00000000 |
| 84 | 1087.36480000 | 9.68160000   | 0.00000000 |
| 85 | 1098.84870000 | 21.08310000  | 0.00000000 |
| 86 | 1113.26960000 | 9.38930000   | 0.00000000 |
| 87 | 1121.37970000 | 131.03510000 | 0.00000000 |
| 88 | 1129.76540000 | 64.70310000  | 0.00000000 |
| 89 | 1137.58850000 | 162.70590000 | 0.00000000 |
| 90 | 1158.32420000 | 17.93080000  | 0.00000000 |
| 91 | 1179.56890000 | 0.79500000   | 0.00000000 |
| 92 | 1181.00580000 | 2.59090000   | 0.00000000 |
| 93 | 1188.93140000 | 326.19020000 | 0.00000000 |
| 94 | 1195.38180000 | 56.78970000  | 0.00000000 |
| 95 | 1199.86290000 | 95.30260000  | 0.00000000 |

|     |               |              |            |
|-----|---------------|--------------|------------|
| 96  | 1204.32070000 | 1.41470000   | 0.00000000 |
| 97  | 1210.96080000 | 12.07050000  | 0.00000000 |
| 98  | 1213.35790000 | 51.93030000  | 0.00000000 |
| 99  | 1240.03810000 | 59.62940000  | 0.00000000 |
| 100 | 1260.28540000 | 52.55290000  | 0.00000000 |
| 101 | 1269.33850000 | 21.56970000  | 0.00000000 |
| 102 | 1277.64190000 | 72.88350000  | 0.00000000 |
| 103 | 1281.67850000 | 42.58560000  | 0.00000000 |
| 104 | 1298.24120000 | 98.27930000  | 0.00000000 |
| 105 | 1317.25600000 | 80.32080000  | 0.00000000 |
| 106 | 1323.25820000 | 60.42390000  | 0.00000000 |
| 107 | 1330.04500000 | 1.44150000   | 0.00000000 |
| 108 | 1341.89470000 | 84.05880000  | 0.00000000 |
| 109 | 1357.58820000 | 2.40190000   | 0.00000000 |
| 110 | 1362.02130000 | 26.24390000  | 0.00000000 |
| 111 | 1365.79250000 | 37.46880000  | 0.00000000 |
| 112 | 1384.46740000 | 30.32070000  | 0.00000000 |
| 113 | 1396.61780000 | 15.20090000  | 0.00000000 |
| 114 | 1396.86480000 | 47.01410000  | 0.00000000 |
| 115 | 1399.36330000 | 32.04350000  | 0.00000000 |
| 116 | 1408.54100000 | 42.93710000  | 0.00000000 |
| 117 | 1414.34660000 | 10.77030000  | 0.00000000 |
| 118 | 1423.23290000 | 21.64910000  | 0.00000000 |
| 119 | 1428.36150000 | 7.03960000   | 0.00000000 |
| 120 | 1437.17690000 | 422.86830000 | 0.00000000 |
| 121 | 1466.68400000 | 0.20920000   | 0.00000000 |
| 122 | 1479.71250000 | 11.62260000  | 0.00000000 |
| 123 | 1483.57560000 | 11.51540000  | 0.00000000 |
| 124 | 1484.02160000 | 2.54130000   | 0.00000000 |
| 125 | 1484.51030000 | 0.35950000   | 0.00000000 |
| 126 | 1484.74700000 | 3.28700000   | 0.00000000 |
| 127 | 1487.41660000 | 23.00520000  | 0.00000000 |
| 128 | 1491.65040000 | 1.00320000   | 0.00000000 |
| 129 | 1493.19840000 | 1.05020000   | 0.00000000 |
| 130 | 1497.61830000 | 7.13960000   | 0.00000000 |
| 131 | 1498.02250000 | 0.50670000   | 0.00000000 |
| 132 | 1503.08510000 | 2.80110000   | 0.00000000 |
| 133 | 1507.92590000 | 11.19420000  | 0.00000000 |
| 134 | 1512.04470000 | 17.19020000  | 0.00000000 |
| 135 | 1517.54040000 | 31.77450000  | 0.00000000 |
| 136 | 1530.80070000 | 19.76860000  | 0.00000000 |
| 137 | 1535.37590000 | 18.20990000  | 0.00000000 |
| 138 | 1624.08240000 | 0.59960000   | 0.00000000 |

|     |               |              |            |
|-----|---------------|--------------|------------|
| 139 | 1626.22880000 | 5.41230000   | 0.00000000 |
| 140 | 1644.21500000 | 7.82930000   | 0.00000000 |
| 141 | 1646.89200000 | 10.29060000  | 0.00000000 |
| 142 | 1702.69400000 | 678.36380000 | 0.00000000 |
| 143 | 2926.18330000 | 45.45510000  | 0.00000000 |
| 144 | 2929.91900000 | 218.51680000 | 0.00000000 |
| 145 | 3028.15440000 | 51.51550000  | 0.00000000 |
| 146 | 3040.95920000 | 16.05290000  | 0.00000000 |
| 147 | 3042.28530000 | 26.82380000  | 0.00000000 |
| 148 | 3043.23450000 | 39.88910000  | 0.00000000 |
| 149 | 3047.02350000 | 29.33560000  | 0.00000000 |
| 150 | 3049.98130000 | 21.87650000  | 0.00000000 |
| 151 | 3087.44510000 | 8.42560000   | 0.00000000 |
| 152 | 3100.39700000 | 22.75400000  | 0.00000000 |
| 153 | 3102.08360000 | 7.16040000   | 0.00000000 |
| 154 | 3103.56690000 | 28.81990000  | 0.00000000 |
| 155 | 3104.84060000 | 7.52810000   | 0.00000000 |
| 156 | 3109.87040000 | 81.77500000  | 0.00000000 |
| 157 | 3110.86980000 | 46.83640000  | 0.00000000 |
| 158 | 3113.03940000 | 33.97600000  | 0.00000000 |
| 159 | 3116.95020000 | 64.36850000  | 0.00000000 |
| 160 | 3119.97030000 | 32.20470000  | 0.00000000 |
| 161 | 3145.19750000 | 3.25890000   | 0.00000000 |
| 162 | 3148.77390000 | 22.28650000  | 0.00000000 |
| 163 | 3157.60400000 | 13.74950000  | 0.00000000 |
| 164 | 3160.90120000 | 18.08750000  | 0.00000000 |
| 165 | 3166.59560000 | 0.51960000   | 0.00000000 |
| 166 | 3168.67990000 | 1.96520000   | 0.00000000 |
| 167 | 3174.87400000 | 17.13660000  | 0.00000000 |
| 168 | 3175.65590000 | 2.96630000   | 0.00000000 |
| 169 | 3185.52330000 | 37.41940000  | 0.00000000 |
| 170 | 3188.78550000 | 32.79100000  | 0.00000000 |
| 171 | 3194.05930000 | 35.47900000  | 0.00000000 |
| 172 | 3198.13090000 | 15.83480000  | 0.00000000 |
| 173 | 3202.88250000 | 10.38690000  | 0.00000000 |
| 174 | 3204.04640000 | 13.16510000  | 0.00000000 |



Left Rotamer Equatorial

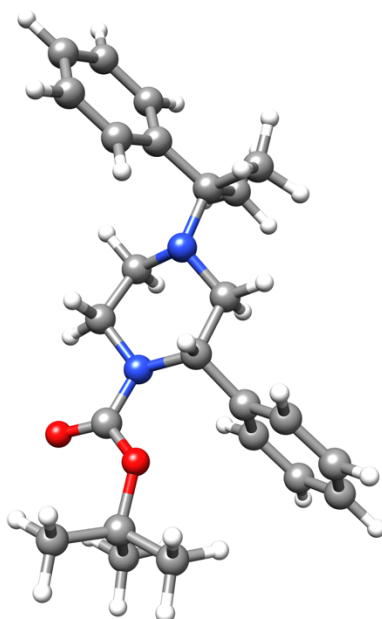

Route : # opt freq b3lyp scrf=(solvent=thf) geom=connectivity def2tzvp  
empiricaldispersion=gd3bj int=ultrafine pop=(regular,mk)  
SMILES : CC(C)(C)OC(=O)N2CCN(C(C)(C)c1ccccc1)CC2c3ccccc3  
Formula : C<sub>24</sub>H<sub>32</sub>N<sub>2</sub>O<sub>2</sub>  
Charge : 0  
Multiplicity : 1  
Dipole : 3.3178 Debye  
Energy : -1194.38233605 a.u.  
Gibbs Energy : -1193.920928 a.u.  
Number of imaginary frequencies : 0

Cartesian Coordinates (XYZ format)

60

|   |             |             |             |
|---|-------------|-------------|-------------|
| C | 0.59771200  | 1.23472000  | 0.03045200  |
| C | -0.64160200 | 0.40258200  | -0.34747700 |
| C | 0.53809900  | -1.49776800 | 0.79460700  |
| C | 1.64894000  | -0.53527900 | 1.14461600  |
| H | 0.39469300  | 1.72272700  | 0.99694500  |
| H | 0.67842000  | 2.01761900  | -0.71795400 |
| H | 0.35161800  | -2.17547800 | 1.62239000  |
| H | 1.42572200  | -0.04790500 | 2.10699600  |
| H | 2.56830800  | -1.10555300 | 1.26563600  |
| H | -0.54160900 | 0.11342300  | -1.39921700 |
| N | -0.72320700 | -0.81010000 | 0.48366100  |
| N | 1.80441000  | 0.43621200  | 0.07275600  |
| C | 3.09163000  | 1.17839300  | 0.09251300  |
| C | 3.14420800  | 2.15131100  | -1.09935100 |
| H | 4.16031300  | 2.52882500  | -1.20960800 |
| H | 2.86354600  | 1.64499300  | -2.02294200 |
| H | 2.48736200  | 3.00867800  | -0.95293000 |
| C | 3.27295500  | 1.98656300  | 1.38742600  |
| H | 3.34992500  | 1.34482700  | 2.26475300  |

|   |             |             |             |
|---|-------------|-------------|-------------|
| H | 4.16845500  | 2.60590300  | 1.34107200  |
| H | 2.42336000  | 2.65500000  | 1.52692800  |
| C | 4.20979300  | 0.15040800  | -0.11906200 |
| C | 4.07902100  | -0.79807400 | -1.13722700 |
| C | 5.38238400  | 0.14809000  | 0.63258700  |
| C | 5.08502900  | -1.71831200 | -1.39421800 |
| H | 3.16653700  | -0.81900300 | -1.71636600 |
| C | 6.39563900  | -0.77348800 | 0.37789400  |
| H | 5.52088100  | 0.86289600  | 1.43065900  |
| C | 6.25240200  | -1.71063200 | -0.63558700 |
| H | 4.95796700  | -2.44532900 | -2.18658300 |
| H | 7.29582900  | -0.75655100 | 0.97925300  |
| H | 7.03771900  | -2.42908800 | -0.83221600 |
| C | -1.82084900 | -1.63838500 | 0.44917900  |
| O | -1.88167000 | -2.69115800 | 1.06253400  |
| O | -2.78831900 | -1.15655200 | -0.33967700 |
| C | -4.16940600 | -1.66247500 | -0.28408300 |
| C | -4.22590400 | -3.08194100 | -0.83524600 |
| H | -3.69564800 | -3.77519900 | -0.18791700 |
| H | -5.26776400 | -3.39676800 | -0.91419600 |
| H | -3.78290300 | -3.11688300 | -1.83177700 |
| C | -4.91352400 | -0.69529400 | -1.19575500 |
| H | -4.83866900 | 0.32288700  | -0.81625200 |
| H | -4.49533100 | -0.72059900 | -2.20249100 |
| H | -5.96567500 | -0.97647800 | -1.24982000 |
| C | -4.70110200 | -1.56708200 | 1.14128300  |
| H | -5.76257400 | -1.81850200 | 1.14409400  |
| H | -4.18011500 | -2.25133900 | 1.80623800  |
| H | -4.58909200 | -0.54888600 | 1.51543600  |
| H | 0.84973100  | -2.09572900 | -0.06999400 |
| C | -1.83305800 | 1.32587300  | -0.20635700 |
| C | -2.38974600 | 1.60699700  | 1.03952100  |
| C | -2.32923500 | 1.98198400  | -1.32777100 |
| C | -3.44078000 | 2.50682400  | 1.15608200  |
| H | -2.01300800 | 1.09901300  | 1.91775000  |
| C | -3.37464200 | 2.89173500  | -1.21461200 |
| H | -1.90578300 | 1.76632600  | -2.30145800 |
| C | -3.93837000 | 3.15354200  | 0.02844500  |
| H | -3.87355300 | 2.70391900  | 2.12871500  |
| H | -3.75536100 | 3.38646300  | -2.09904000 |
| H | -4.75937800 | 3.85291900  | 0.11896600  |

### Frequencies

| Mode | IR frequency | IR intensity | Raman intensity |
|------|--------------|--------------|-----------------|
| 1    | 19.90680000  | 0.18610000   | 0.00000000      |
| 2    | 25.90740000  | 0.32400000   | 0.00000000      |
| 3    | 37.16180000  | 0.16090000   | 0.00000000      |
| 4    | 38.39810000  | 0.21420000   | 0.00000000      |
| 5    | 51.89530000  | 2.18110000   | 0.00000000      |
| 6    | 62.96650000  | 0.31220000   | 0.00000000      |
| 7    | 70.42930000  | 0.74730000   | 0.00000000      |
| 8    | 78.56530000  | 2.53890000   | 0.00000000      |
| 9    | 96.83610000  | 1.00950000   | 0.00000000      |

|    |              |             |            |
|----|--------------|-------------|------------|
| 10 | 101.04830000 | 0.57430000  | 0.00000000 |
| 11 | 137.86720000 | 0.98540000  | 0.00000000 |
| 12 | 146.61180000 | 1.53230000  | 0.00000000 |
| 13 | 172.89550000 | 3.07800000  | 0.00000000 |
| 14 | 190.25080000 | 2.02510000  | 0.00000000 |
| 15 | 205.76000000 | 0.26180000  | 0.00000000 |
| 16 | 213.31230000 | 0.66210000  | 0.00000000 |
| 17 | 233.49250000 | 3.46830000  | 0.00000000 |
| 18 | 244.66450000 | 2.08100000  | 0.00000000 |
| 19 | 248.24270000 | 0.58250000  | 0.00000000 |
| 20 | 258.45610000 | 0.69050000  | 0.00000000 |
| 21 | 271.51140000 | 5.02430000  | 0.00000000 |
| 22 | 276.71180000 | 0.83250000  | 0.00000000 |
| 23 | 285.20590000 | 1.31630000  | 0.00000000 |
| 24 | 300.05600000 | 0.24790000  | 0.00000000 |
| 25 | 310.51240000 | 2.60850000  | 0.00000000 |
| 26 | 325.78780000 | 1.41640000  | 0.00000000 |
| 27 | 328.43500000 | 6.92560000  | 0.00000000 |
| 28 | 337.59100000 | 5.51160000  | 0.00000000 |
| 29 | 353.84440000 | 1.93590000  | 0.00000000 |
| 30 | 362.54530000 | 2.96380000  | 0.00000000 |
| 31 | 384.91020000 | 10.33900000 | 0.00000000 |
| 32 | 417.79230000 | 0.07850000  | 0.00000000 |
| 33 | 418.67750000 | 0.29280000  | 0.00000000 |
| 34 | 419.50130000 | 0.45530000  | 0.00000000 |
| 35 | 431.29950000 | 5.08280000  | 0.00000000 |
| 36 | 462.17180000 | 2.38120000  | 0.00000000 |
| 37 | 465.78320000 | 4.50740000  | 0.00000000 |
| 38 | 483.58090000 | 3.11390000  | 0.00000000 |
| 39 | 500.52000000 | 0.99420000  | 0.00000000 |
| 40 | 522.50320000 | 4.78480000  | 0.00000000 |
| 41 | 541.44360000 | 7.72770000  | 0.00000000 |
| 42 | 566.87930000 | 10.92890000 | 0.00000000 |
| 43 | 585.31100000 | 26.60070000 | 0.00000000 |
| 44 | 615.75770000 | 25.98910000 | 0.00000000 |
| 45 | 636.39940000 | 0.00940000  | 0.00000000 |
| 46 | 638.03910000 | 0.50250000  | 0.00000000 |
| 47 | 648.59520000 | 0.43360000  | 0.00000000 |
| 48 | 698.62500000 | 2.05590000  | 0.00000000 |
| 49 | 716.81810000 | 63.45290000 | 0.00000000 |
| 50 | 718.09460000 | 83.64480000 | 0.00000000 |
| 51 | 735.77830000 | 2.09900000  | 0.00000000 |
| 52 | 762.77450000 | 13.81810000 | 0.00000000 |

|    |               |              |            |
|----|---------------|--------------|------------|
| 53 | 777.34650000  | 12.92350000  | 0.00000000 |
| 54 | 787.00300000  | 46.06650000  | 0.00000000 |
| 55 | 794.05120000  | 54.94700000  | 0.00000000 |
| 56 | 815.35260000  | 16.41550000  | 0.00000000 |
| 57 | 835.90350000  | 3.27920000   | 0.00000000 |
| 58 | 860.88310000  | 29.31870000  | 0.00000000 |
| 59 | 861.38450000  | 1.13000000   | 0.00000000 |
| 60 | 862.55280000  | 0.45410000   | 0.00000000 |
| 61 | 863.56900000  | 22.04470000  | 0.00000000 |
| 62 | 913.17260000  | 4.66780000   | 0.00000000 |
| 63 | 930.75380000  | 2.38420000   | 0.00000000 |
| 64 | 931.18130000  | 5.29110000   | 0.00000000 |
| 65 | 931.82950000  | 1.18060000   | 0.00000000 |
| 66 | 933.44330000  | 0.88850000   | 0.00000000 |
| 67 | 942.30380000  | 11.67210000  | 0.00000000 |
| 68 | 949.63670000  | 7.52040000   | 0.00000000 |
| 69 | 973.37530000  | 0.20360000   | 0.00000000 |
| 70 | 983.16750000  | 0.13380000   | 0.00000000 |
| 71 | 985.07970000  | 0.27710000   | 0.00000000 |
| 72 | 994.92700000  | 88.32180000  | 0.00000000 |
| 73 | 998.69250000  | 2.00740000   | 0.00000000 |
| 74 | 1001.41940000 | 6.00830000   | 0.00000000 |
| 75 | 1021.84050000 | 3.62810000   | 0.00000000 |
| 76 | 1023.05550000 | 22.69370000  | 0.00000000 |
| 77 | 1025.71980000 | 0.73560000   | 0.00000000 |
| 78 | 1026.63230000 | 7.59220000   | 0.00000000 |
| 79 | 1052.54450000 | 4.63030000   | 0.00000000 |
| 80 | 1053.45730000 | 24.20150000  | 0.00000000 |
| 81 | 1053.69340000 | 2.73270000   | 0.00000000 |
| 82 | 1057.36360000 | 3.82430000   | 0.00000000 |
| 83 | 1068.48980000 | 3.73740000   | 0.00000000 |
| 84 | 1088.38000000 | 11.09800000  | 0.00000000 |
| 85 | 1101.25070000 | 10.81690000  | 0.00000000 |
| 86 | 1104.51080000 | 13.59910000  | 0.00000000 |
| 87 | 1124.05510000 | 4.30150000   | 0.00000000 |
| 88 | 1136.76460000 | 12.57990000  | 0.00000000 |
| 89 | 1143.79050000 | 256.66590000 | 0.00000000 |
| 90 | 1165.43750000 | 18.29450000  | 0.00000000 |
| 91 | 1179.23490000 | 2.01120000   | 0.00000000 |
| 92 | 1180.33870000 | 1.21110000   | 0.00000000 |
| 93 | 1184.76190000 | 51.77040000  | 0.00000000 |
| 94 | 1189.29250000 | 424.20090000 | 0.00000000 |
| 95 | 1200.48130000 | 9.06760000   | 0.00000000 |

|     |               |              |            |
|-----|---------------|--------------|------------|
| 96  | 1202.67330000 | 98.71260000  | 0.00000000 |
| 97  | 1206.99020000 | 3.04740000   | 0.00000000 |
| 98  | 1222.26170000 | 15.65790000  | 0.00000000 |
| 99  | 1238.56180000 | 24.42690000  | 0.00000000 |
| 100 | 1258.62840000 | 94.35770000  | 0.00000000 |
| 101 | 1270.46490000 | 22.32610000  | 0.00000000 |
| 102 | 1277.13390000 | 15.19820000  | 0.00000000 |
| 103 | 1281.64380000 | 57.71320000  | 0.00000000 |
| 104 | 1290.43410000 | 11.73390000  | 0.00000000 |
| 105 | 1306.92280000 | 268.01650000 | 0.00000000 |
| 106 | 1329.99110000 | 1.25180000   | 0.00000000 |
| 107 | 1331.03390000 | 37.67280000  | 0.00000000 |
| 108 | 1348.74090000 | 41.11430000  | 0.00000000 |
| 109 | 1354.99330000 | 77.31280000  | 0.00000000 |
| 110 | 1359.64770000 | 5.21830000   | 0.00000000 |
| 111 | 1367.14100000 | 126.43170000 | 0.00000000 |
| 112 | 1388.53590000 | 31.21200000  | 0.00000000 |
| 113 | 1396.48410000 | 26.53530000  | 0.00000000 |
| 114 | 1397.71440000 | 13.93140000  | 0.00000000 |
| 115 | 1400.31000000 | 45.87360000  | 0.00000000 |
| 116 | 1402.31280000 | 71.95190000  | 0.00000000 |
| 117 | 1415.12380000 | 22.65040000  | 0.00000000 |
| 118 | 1424.50180000 | 5.86760000   | 0.00000000 |
| 119 | 1427.05650000 | 118.61650000 | 0.00000000 |
| 120 | 1431.71610000 | 15.57300000  | 0.00000000 |
| 121 | 1467.14730000 | 0.36380000   | 0.00000000 |
| 122 | 1479.52220000 | 10.97100000  | 0.00000000 |
| 123 | 1484.18940000 | 3.98250000   | 0.00000000 |
| 124 | 1484.62530000 | 4.84450000   | 0.00000000 |
| 125 | 1485.61030000 | 0.64640000   | 0.00000000 |
| 126 | 1488.44990000 | 24.59300000  | 0.00000000 |
| 127 | 1490.22120000 | 1.58530000   | 0.00000000 |
| 128 | 1491.44270000 | 8.21910000   | 0.00000000 |
| 129 | 1494.05980000 | 0.13250000   | 0.00000000 |
| 130 | 1497.27450000 | 2.68690000   | 0.00000000 |
| 131 | 1498.22610000 | 5.35980000   | 0.00000000 |
| 132 | 1503.46060000 | 10.54520000  | 0.00000000 |
| 133 | 1508.82800000 | 11.08470000  | 0.00000000 |
| 134 | 1510.16910000 | 7.88190000   | 0.00000000 |
| 135 | 1518.25880000 | 23.34740000  | 0.00000000 |
| 136 | 1531.85850000 | 24.64210000  | 0.00000000 |
| 137 | 1533.11410000 | 14.74740000  | 0.00000000 |
| 138 | 1624.30420000 | 0.86050000   | 0.00000000 |

|     |               |              |            |
|-----|---------------|--------------|------------|
| 139 | 1629.05920000 | 1.48490000   | 0.00000000 |
| 140 | 1644.85420000 | 10.19930000  | 0.00000000 |
| 141 | 1648.00250000 | 13.91620000  | 0.00000000 |
| 142 | 1701.87980000 | 686.56200000 | 0.00000000 |
| 143 | 2933.87130000 | 36.18600000  | 0.00000000 |
| 144 | 2937.94310000 | 133.93720000 | 0.00000000 |
| 145 | 2998.26360000 | 74.86770000  | 0.00000000 |
| 146 | 3006.86900000 | 67.75680000  | 0.00000000 |
| 147 | 3042.46490000 | 18.54140000  | 0.00000000 |
| 148 | 3043.32770000 | 27.00580000  | 0.00000000 |
| 149 | 3044.84690000 | 31.15250000  | 0.00000000 |
| 150 | 3049.54830000 | 24.13960000  | 0.00000000 |
| 151 | 3051.71870000 | 27.31430000  | 0.00000000 |
| 152 | 3101.38450000 | 16.28720000  | 0.00000000 |
| 153 | 3103.52890000 | 23.58000000  | 0.00000000 |
| 154 | 3107.02950000 | 3.15790000   | 0.00000000 |
| 155 | 3108.05010000 | 15.33130000  | 0.00000000 |
| 156 | 3111.44150000 | 81.67150000  | 0.00000000 |
| 157 | 3113.72320000 | 62.59960000  | 0.00000000 |
| 158 | 3115.21130000 | 36.66760000  | 0.00000000 |
| 159 | 3117.92320000 | 34.65400000  | 0.00000000 |
| 160 | 3126.11390000 | 26.97640000  | 0.00000000 |
| 161 | 3133.05710000 | 26.53190000  | 0.00000000 |
| 162 | 3133.92880000 | 16.34810000  | 0.00000000 |
| 163 | 3141.12140000 | 6.65130000   | 0.00000000 |
| 164 | 3146.08190000 | 20.54590000  | 0.00000000 |
| 165 | 3162.69060000 | 8.85820000   | 0.00000000 |
| 166 | 3167.27780000 | 0.70440000   | 0.00000000 |
| 167 | 3169.63330000 | 0.00660000   | 0.00000000 |
| 168 | 3175.56470000 | 17.73040000  | 0.00000000 |
| 169 | 3178.78100000 | 19.35970000  | 0.00000000 |
| 170 | 3186.47530000 | 34.99630000  | 0.00000000 |
| 171 | 3189.78420000 | 36.12560000  | 0.00000000 |
| 172 | 3195.33280000 | 19.68930000  | 0.00000000 |
| 173 | 3200.63080000 | 14.37230000  | 0.00000000 |
| 174 | 3207.21090000 | 11.80830000  | 0.00000000 |

## Right Rotamer Equatorial

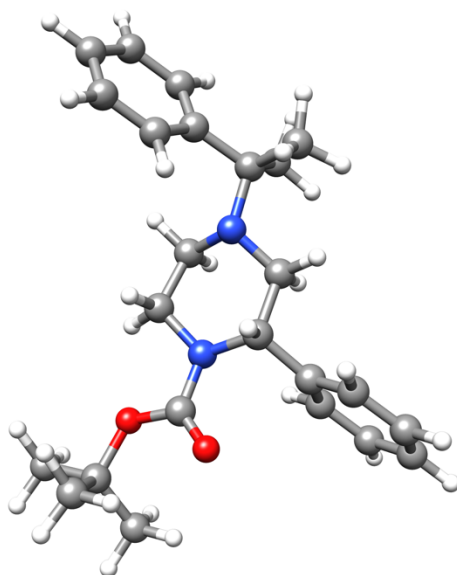

Route : # opt freq b3lyp scrf=(solvent=thf) geom=connectivity def2tzvp  
empiricaldispersion=gd3bj int=ultrafine pop=(regular,mk)  
SMILES : CC(C)(C)OC(=O)N2CCN(C(C)(C)C1CCCCC1)CC2c3CCCCC3  
Formula : C<sub>24</sub>H<sub>32</sub>N<sub>2</sub>O<sub>2</sub>  
Charge : 0  
Multiplicity : 1  
Dipole : 3.1397 Debye  
Energy : -1194.37986331 a.u.  
Gibbs Energy : -1193.919973 a.u.  
Number of imaginary frequencies : 0

### Cartesian Coordinates (XYZ format)

60

|   |             |             |             |
|---|-------------|-------------|-------------|
| C | 0.58254600  | 1.55735700  | 0.07935800  |
| C | -0.71366600 | 0.95659900  | -0.48887500 |
| C | 0.10553700  | -1.22046200 | 0.47109600  |
| C | 1.29715800  | -0.46443900 | 1.01361600  |
| H | 0.36632900  | 1.94446300  | 1.08773300  |
| H | 0.82561100  | 2.40844800  | -0.55005100 |
| H | -0.22717100 | -1.94987600 | 1.20280200  |
| H | 1.05860700  | -0.06926500 | 2.01400100  |
| H | 2.12191000  | -1.16678300 | 1.12226900  |
| H | -0.56651800 | 0.79553000  | -1.56232700 |
| N | -1.02346800 | -0.33049800 | 0.15323100  |
| N | 1.66608000  | 0.59697700  | 0.09090900  |
| C | 3.03610300  | 1.13683000  | 0.28622500  |
| C | 3.31011700  | 2.23786600  | -0.75397700 |
| H | 4.37323500  | 2.47641500  | -0.75188000 |
| H | 3.03546300  | 1.90082700  | -1.75352600 |
| H | 2.76530500  | 3.15444700  | -0.52811600 |
| C | 3.22640800  | 1.73559200  | 1.68914700  |
| H | 3.15250300  | 0.98058400  | 2.47144600  |

|   |             |             |             |
|---|-------------|-------------|-------------|
| H | 4.19677300  | 2.22328200  | 1.77964500  |
| H | 2.46422100  | 2.49300800  | 1.87246500  |
| C | 4.01695000  | -0.00602500 | -0.00304400 |
| C | 3.83035800  | -0.79064900 | -1.14454000 |
| C | 5.12353600  | -0.27005700 | 0.80052400  |
| C | 4.71836800  | -1.80560800 | -1.47063500 |
| H | 2.96598600  | -0.60759400 | -1.76735700 |
| C | 6.01834300  | -1.28765000 | 0.47684700  |
| H | 5.30169700  | 0.31223400  | 1.69286700  |
| C | 5.82050200  | -2.06018700 | -0.65896200 |
| H | 4.54998100  | -2.40130300 | -2.35909900 |
| H | 6.86887700  | -1.47489800 | 1.12012400  |
| H | 6.51360600  | -2.85285000 | -0.90970500 |
| C | -2.21469000 | -0.91579500 | -0.21060200 |
| O | -3.04637900 | -0.38769600 | -0.92377000 |
| O | -2.34071200 | -2.13647100 | 0.34139000  |
| C | -3.53382400 | -2.96696300 | 0.11710800  |
| C | -4.76879000 | -2.27148600 | 0.67889100  |
| H | -5.00754200 | -1.37450300 | 0.11413400  |
| H | -5.61819800 | -2.95462200 | 0.63199100  |
| H | -4.60644600 | -2.00120400 | 1.72343800  |
| C | -3.21579700 | -4.22367800 | 0.91788900  |
| H | -2.30848200 | -4.69805700 | 0.54249500  |
| H | -3.07226700 | -3.98067300 | 1.97119200  |
| H | -4.03882600 | -4.93375800 | 0.83453200  |
| C | -3.67410200 | -3.29839200 | -1.36454800 |
| H | -4.47405000 | -4.02881200 | -1.49437500 |
| H | -3.91063500 | -2.41264400 | -1.94759400 |
| H | -2.74875800 | -3.73653800 | -1.74186100 |
| H | 0.41322600  | -1.76010400 | -0.43186600 |
| C | -1.79854000 | 1.99408400  | -0.29580300 |
| C | -2.41906200 | 2.16930600  | 0.93929900  |
| C | -2.11177500 | 2.86437600  | -1.33495100 |
| C | -3.34946100 | 3.18370600  | 1.12468400  |
| H | -2.18352400 | 1.49553500  | 1.75292900  |
| C | -3.03738100 | 3.88570600  | -1.15196900 |
| H | -1.63660900 | 2.73392700  | -2.29995800 |
| C | -3.66226200 | 4.04742600  | 0.07935200  |
| H | -3.83187500 | 3.30094800  | 2.08693400  |
| H | -3.27501200 | 4.54999900  | -1.97317100 |
| H | -4.38842900 | 4.83708000  | 0.22317400  |

### Frequencies

| Mode | IR frequency | IR intensity | Raman intensity |
|------|--------------|--------------|-----------------|
| 1    | 16.92750000  | 0.14550000   | 0.00000000      |
| 2    | 25.48900000  | 0.00940000   | 0.00000000      |
| 3    | 28.80960000  | 1.26870000   | 0.00000000      |
| 4    | 37.93280000  | 0.17050000   | 0.00000000      |
| 5    | 39.50600000  | 0.68550000   | 0.00000000      |
| 6    | 48.12010000  | 0.23530000   | 0.00000000      |
| 7    | 67.70140000  | 1.71730000   | 0.00000000      |
| 8    | 70.74700000  | 0.88300000   | 0.00000000      |
| 9    | 92.50190000  | 1.06280000   | 0.00000000      |



|    |              |             |            |
|----|--------------|-------------|------------|
| 10 | 109.26090000 | 0.18700000  | 0.00000000 |
| 11 | 121.45410000 | 0.84690000  | 0.00000000 |
| 12 | 145.45710000 | 2.67230000  | 0.00000000 |
| 13 | 174.05900000 | 4.00370000  | 0.00000000 |
| 14 | 191.68470000 | 0.60290000  | 0.00000000 |
| 15 | 203.19840000 | 0.33610000  | 0.00000000 |
| 16 | 209.48160000 | 4.27490000  | 0.00000000 |
| 17 | 232.37320000 | 2.42270000  | 0.00000000 |
| 18 | 242.43800000 | 2.99630000  | 0.00000000 |
| 19 | 245.65300000 | 1.64000000  | 0.00000000 |
| 20 | 261.74270000 | 2.74410000  | 0.00000000 |
| 21 | 268.90830000 | 5.64180000  | 0.00000000 |
| 22 | 272.43170000 | 3.86070000  | 0.00000000 |
| 23 | 287.32980000 | 1.85360000  | 0.00000000 |
| 24 | 300.89020000 | 1.56470000  | 0.00000000 |
| 25 | 304.47670000 | 0.87720000  | 0.00000000 |
| 26 | 316.64970000 | 0.12970000  | 0.00000000 |
| 27 | 330.37220000 | 0.42320000  | 0.00000000 |
| 28 | 334.47620000 | 20.38350000 | 0.00000000 |
| 29 | 352.69660000 | 1.55200000  | 0.00000000 |
| 30 | 353.50200000 | 0.85080000  | 0.00000000 |
| 31 | 406.45410000 | 4.31230000  | 0.00000000 |
| 32 | 416.23350000 | 3.51090000  | 0.00000000 |
| 33 | 417.63330000 | 0.10150000  | 0.00000000 |
| 34 | 417.85650000 | 0.41940000  | 0.00000000 |
| 35 | 428.76040000 | 2.59070000  | 0.00000000 |
| 36 | 458.72050000 | 2.86240000  | 0.00000000 |
| 37 | 462.78460000 | 5.72860000  | 0.00000000 |
| 38 | 483.74660000 | 0.80740000  | 0.00000000 |
| 39 | 503.75920000 | 1.75700000  | 0.00000000 |
| 40 | 529.80480000 | 6.03840000  | 0.00000000 |
| 41 | 548.22720000 | 31.75440000 | 0.00000000 |
| 42 | 560.58100000 | 10.09700000 | 0.00000000 |
| 43 | 588.99690000 | 8.89110000  | 0.00000000 |
| 44 | 612.29640000 | 16.10710000 | 0.00000000 |
| 45 | 636.94610000 | 0.25640000  | 0.00000000 |
| 46 | 637.72440000 | 2.26820000  | 0.00000000 |
| 47 | 641.20940000 | 5.17480000  | 0.00000000 |
| 48 | 691.44490000 | 1.25060000  | 0.00000000 |
| 49 | 715.42610000 | 58.02960000 | 0.00000000 |
| 50 | 716.71970000 | 81.61040000 | 0.00000000 |
| 51 | 734.82190000 | 2.90700000  | 0.00000000 |
| 52 | 770.63050000 | 17.55210000 | 0.00000000 |

|    |               |              |            |
|----|---------------|--------------|------------|
| 53 | 776.16130000  | 11.14340000  | 0.00000000 |
| 54 | 786.91240000  | 48.38720000  | 0.00000000 |
| 55 | 797.95780000  | 31.06770000  | 0.00000000 |
| 56 | 815.40600000  | 20.49230000  | 0.00000000 |
| 57 | 834.89970000  | 7.77320000   | 0.00000000 |
| 58 | 852.84380000  | 12.89800000  | 0.00000000 |
| 59 | 858.95960000  | 0.05220000   | 0.00000000 |
| 60 | 861.51870000  | 0.29520000   | 0.00000000 |
| 61 | 875.45980000  | 39.18670000  | 0.00000000 |
| 62 | 913.04730000  | 4.31880000   | 0.00000000 |
| 63 | 926.93350000  | 9.98940000   | 0.00000000 |
| 64 | 930.11250000  | 0.03770000   | 0.00000000 |
| 65 | 930.48410000  | 0.02800000   | 0.00000000 |
| 66 | 933.48650000  | 1.24420000   | 0.00000000 |
| 67 | 942.08160000  | 11.11370000  | 0.00000000 |
| 68 | 953.48930000  | 2.36360000   | 0.00000000 |
| 69 | 971.73680000  | 0.08470000   | 0.00000000 |
| 70 | 975.69670000  | 0.20680000   | 0.00000000 |
| 71 | 983.36180000  | 0.14100000   | 0.00000000 |
| 72 | 990.30090000  | 8.88830000   | 0.00000000 |
| 73 | 997.35990000  | 54.33640000  | 0.00000000 |
| 74 | 999.59660000  | 31.40920000  | 0.00000000 |
| 75 | 1021.76930000 | 7.41480000   | 0.00000000 |
| 76 | 1024.13760000 | 18.07400000  | 0.00000000 |
| 77 | 1024.99940000 | 20.87450000  | 0.00000000 |
| 78 | 1026.21110000 | 5.48700000   | 0.00000000 |
| 79 | 1051.68300000 | 4.86270000   | 0.00000000 |
| 80 | 1052.41960000 | 3.02160000   | 0.00000000 |
| 81 | 1053.28040000 | 42.31610000  | 0.00000000 |
| 82 | 1054.06970000 | 7.57140000   | 0.00000000 |
| 83 | 1066.02900000 | 28.18050000  | 0.00000000 |
| 84 | 1088.63120000 | 49.41020000  | 0.00000000 |
| 85 | 1101.02930000 | 19.56360000  | 0.00000000 |
| 86 | 1103.99650000 | 5.80800000   | 0.00000000 |
| 87 | 1123.42850000 | 11.74270000  | 0.00000000 |
| 88 | 1136.49160000 | 6.83490000   | 0.00000000 |
| 89 | 1145.67640000 | 184.72930000 | 0.00000000 |
| 90 | 1164.37580000 | 69.31400000  | 0.00000000 |
| 91 | 1178.78230000 | 1.61340000   | 0.00000000 |
| 92 | 1180.19140000 | 3.13570000   | 0.00000000 |
| 93 | 1184.84320000 | 340.19420000 | 0.00000000 |
| 94 | 1192.62390000 | 212.89220000 | 0.00000000 |
| 95 | 1199.47640000 | 11.17520000  | 0.00000000 |

|     |               |              |            |
|-----|---------------|--------------|------------|
| 96  | 1202.42230000 | 117.23610000 | 0.00000000 |
| 97  | 1206.29830000 | 4.55780000   | 0.00000000 |
| 98  | 1221.97500000 | 11.82370000  | 0.00000000 |
| 99  | 1233.97630000 | 59.82840000  | 0.00000000 |
| 100 | 1267.56170000 | 164.13560000 | 0.00000000 |
| 101 | 1269.13560000 | 38.16960000  | 0.00000000 |
| 102 | 1274.15110000 | 45.82330000  | 0.00000000 |
| 103 | 1281.20250000 | 23.60070000  | 0.00000000 |
| 104 | 1291.12950000 | 37.69040000  | 0.00000000 |
| 105 | 1299.43410000 | 188.75550000 | 0.00000000 |
| 106 | 1330.16050000 | 2.08530000   | 0.00000000 |
| 107 | 1331.28830000 | 13.70900000  | 0.00000000 |
| 108 | 1348.45080000 | 72.90130000  | 0.00000000 |
| 109 | 1352.98030000 | 104.28470000 | 0.00000000 |
| 110 | 1359.09000000 | 6.28460000   | 0.00000000 |
| 111 | 1365.93870000 | 130.81290000 | 0.00000000 |
| 112 | 1389.48700000 | 11.09920000  | 0.00000000 |
| 113 | 1396.60660000 | 24.41250000  | 0.00000000 |
| 114 | 1397.28140000 | 31.60050000  | 0.00000000 |
| 115 | 1399.48710000 | 22.72600000  | 0.00000000 |
| 116 | 1404.62730000 | 71.26090000  | 0.00000000 |
| 117 | 1414.88830000 | 32.65560000  | 0.00000000 |
| 118 | 1416.90920000 | 27.79630000  | 0.00000000 |
| 119 | 1423.91160000 | 38.75990000  | 0.00000000 |
| 120 | 1431.58780000 | 2.61540000   | 0.00000000 |
| 121 | 1466.55970000 | 0.14140000   | 0.00000000 |
| 122 | 1479.49490000 | 11.02260000  | 0.00000000 |
| 123 | 1483.84450000 | 2.94620000   | 0.00000000 |
| 124 | 1484.08910000 | 4.81030000   | 0.00000000 |
| 125 | 1484.25730000 | 0.09690000   | 0.00000000 |
| 126 | 1487.87580000 | 19.98820000  | 0.00000000 |
| 127 | 1489.84390000 | 8.06770000   | 0.00000000 |
| 128 | 1491.18240000 | 2.51650000   | 0.00000000 |
| 129 | 1493.79430000 | 0.76240000   | 0.00000000 |
| 130 | 1497.17960000 | 2.42230000   | 0.00000000 |
| 131 | 1498.35640000 | 8.13860000   | 0.00000000 |
| 132 | 1503.33420000 | 7.64190000   | 0.00000000 |
| 133 | 1509.34920000 | 13.83660000  | 0.00000000 |
| 134 | 1510.53640000 | 3.79570000   | 0.00000000 |
| 135 | 1516.82020000 | 23.61880000  | 0.00000000 |
| 136 | 1531.85820000 | 26.37790000  | 0.00000000 |
| 137 | 1532.52410000 | 10.97630000  | 0.00000000 |
| 138 | 1624.42360000 | 0.77410000   | 0.00000000 |

|     |               |              |            |
|-----|---------------|--------------|------------|
| 139 | 1628.91130000 | 1.80050000   | 0.00000000 |
| 140 | 1644.66000000 | 10.82170000  | 0.00000000 |
| 141 | 1647.49020000 | 10.47060000  | 0.00000000 |
| 142 | 1721.45060000 | 567.32570000 | 0.00000000 |
| 143 | 2933.03900000 | 36.99960000  | 0.00000000 |
| 144 | 2937.45470000 | 134.59450000 | 0.00000000 |
| 145 | 3000.79430000 | 60.30940000  | 0.00000000 |
| 146 | 3006.02690000 | 76.24420000  | 0.00000000 |
| 147 | 3041.09430000 | 16.22530000  | 0.00000000 |
| 148 | 3043.20980000 | 39.07910000  | 0.00000000 |
| 149 | 3043.65620000 | 27.28190000  | 0.00000000 |
| 150 | 3049.53650000 | 25.54930000  | 0.00000000 |
| 151 | 3049.96820000 | 21.54960000  | 0.00000000 |
| 152 | 3102.12490000 | 4.65240000   | 0.00000000 |
| 153 | 3102.21630000 | 26.36480000  | 0.00000000 |
| 154 | 3103.72620000 | 29.02750000  | 0.00000000 |
| 155 | 3107.50350000 | 3.28270000   | 0.00000000 |
| 156 | 3110.89890000 | 44.00610000  | 0.00000000 |
| 157 | 3111.52020000 | 83.78020000  | 0.00000000 |
| 158 | 3115.21290000 | 34.78250000  | 0.00000000 |
| 159 | 3116.99710000 | 62.75520000  | 0.00000000 |
| 160 | 3118.19360000 | 33.27630000  | 0.00000000 |
| 161 | 3133.62370000 | 31.03300000  | 0.00000000 |
| 162 | 3136.49070000 | 14.85580000  | 0.00000000 |
| 163 | 3145.06810000 | 1.91620000   | 0.00000000 |
| 164 | 3148.39350000 | 24.76500000  | 0.00000000 |
| 165 | 3162.08420000 | 9.52310000   | 0.00000000 |
| 166 | 3167.13250000 | 0.73090000   | 0.00000000 |
| 167 | 3168.53020000 | 0.01020000   | 0.00000000 |
| 168 | 3175.38570000 | 16.94620000  | 0.00000000 |
| 169 | 3177.80800000 | 21.43640000  | 0.00000000 |
| 170 | 3185.47860000 | 39.58230000  | 0.00000000 |
| 171 | 3189.43940000 | 34.67580000  | 0.00000000 |
| 172 | 3194.34360000 | 20.41050000  | 0.00000000 |
| 173 | 3198.83140000 | 15.87910000  | 0.00000000 |
| 174 | 3206.55090000 | 12.59290000  | 0.00000000 |

### Axial Clockwise Transition State

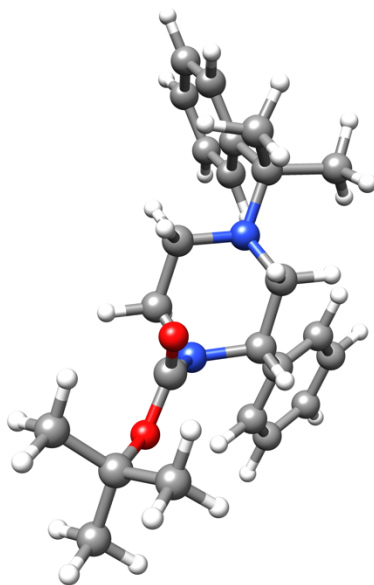

Route : # opt freq b3lyp scrf=(solvent=thf) geom=connectivity def2tzvp  
empiricaldispersion=gd3bj int=ultrafine pop=(regular,mk)  
SMILES : CC(C)(C)OC(=O)N2CCN(C(C)(C)c1cccc1)CC2c3cccc3  
Formula : C<sub>24</sub>H<sub>32</sub>N<sub>2</sub>O<sub>2</sub>  
Charge : 0  
Multiplicity : 1  
Dipole : 1.6544 Debye  
Energy : -1194.35793774 a.u.  
Gibbs Energy : -1193.895918 a.u.  
Number of imaginary frequencies : 1

### Cartesian Coordinates (XYZ format)

60

|   |             |             |             |
|---|-------------|-------------|-------------|
| C | 0.61246900  | -1.22856400 | 0.52203800  |
| C | -0.44294200 | -0.39147400 | 1.22993400  |
| C | -0.90368300 | 0.78122200  | -0.86036600 |
| C | 0.16458200  | -0.09235000 | -1.53281300 |
| H | -0.92258000 | -0.96985400 | 2.02037100  |
| H | 0.15827600  | -2.16526600 | 0.17222700  |
| H | 1.39523100  | -1.48310000 | 1.23628900  |
| H | -1.71902100 | 0.89910500  | -1.58011200 |
| H | -0.34391200 | -0.96824900 | -1.95796300 |
| H | 0.59732400  | 0.45918600  | -2.36178200 |
| H | 0.03711800  | 0.47329300  | 1.69326900  |
| N | -1.48220800 | 0.12581100  | 0.32936200  |
| N | 1.19882800  | -0.46085400 | -0.57533900 |
| C | 2.43600900  | -1.06861200 | -1.12525300 |
| C | 2.19408800  | -2.49052100 | -1.66022400 |
| H | 3.07670600  | -2.87392700 | -2.17200400 |
| H | 1.93223200  | -3.18986200 | -0.86726700 |
| H | 1.37813300  | -2.47494900 | -2.38325300 |

|   |             |             |             |
|---|-------------|-------------|-------------|
| C | 2.98681900  | -0.21336200 | -2.28083900 |
| H | 3.07947000  | 0.83082300  | -1.98460500 |
| H | 3.97914900  | -0.57605600 | -2.54711600 |
| H | 2.36129200  | -0.27818700 | -3.17098900 |
| C | 3.49158100  | -1.02821300 | -0.01299500 |
| C | 4.34306600  | -2.09619200 | 0.25813700  |
| C | 3.64832100  | 0.14567800  | 0.72949200  |
| C | 5.32323700  | -1.99885800 | 1.24362100  |
| H | 4.25063500  | -3.02090700 | -0.29313900 |
| C | 4.62274000  | 0.24691300  | 1.71195700  |
| H | 2.97948100  | 0.97378800  | 0.53985800  |
| C | 5.46776900  | -0.82816300 | 1.97500700  |
| H | 5.97024600  | -2.84487200 | 1.43868900  |
| H | 4.72217200  | 1.16556800  | 2.27668500  |
| H | 6.22676800  | -0.75267400 | 2.74308100  |
| C | -0.44170200 | 2.18343800  | -0.47225000 |
| C | 0.73448800  | 2.75362200  | -0.95327700 |
| C | -1.25323600 | 2.95120100  | 0.36503300  |
| C | 1.09399400  | 4.05239800  | -0.60558900 |
| H | 1.39033700  | 2.18784400  | -1.59561800 |
| C | -0.90020200 | 4.24844600  | 0.71278600  |
| H | -2.16083100 | 2.51115600  | 0.75474000  |
| C | 0.27972800  | 4.80585900  | 0.23001000  |
| H | 2.01765400  | 4.47021000  | -0.98584400 |
| H | -1.54609700 | 4.82447500  | 1.36357900  |
| H | 0.56081000  | 5.81466400  | 0.50385300  |
| C | -2.51264600 | -0.80524900 | 0.03098800  |
| O | -2.37716100 | -1.83534100 | -0.59036600 |
| O | -3.66198800 | -0.36618300 | 0.54192600  |
| C | -4.92835900 | -1.11932900 | 0.38868300  |
| C | -5.28934200 | -1.22531500 | -1.08775300 |
| H | -4.58942800 | -1.85988400 | -1.62493000 |
| H | -6.28879300 | -1.65237500 | -1.18045700 |
| H | -5.29899200 | -0.23556200 | -1.54662200 |
| C | -5.92560200 | -0.23639600 | 1.12657200  |
| H | -5.63824100 | -0.12447800 | 2.17237800  |
| H | -5.97323900 | 0.75263500  | 0.67010100  |
| H | -6.91777700 | -0.68606600 | 1.08511100  |
| C | -4.80818800 | -2.47982300 | 1.06396800  |
| H | -5.78801100 | -2.95915300 | 1.07520300  |
| H | -4.11095200 | -3.12645400 | 0.53794900  |
| H | -4.47623100 | -2.36152100 | 2.09646600  |

### Frequencies

| Mode | IR frequency | IR intensity | Raman intensity |
|------|--------------|--------------|-----------------|
| 1    | -55.60110000 | 2.07050000   | 0.00000000      |
| 2    | 15.00210000  | 0.04520000   | 0.00000000      |
| 3    | 24.31270000  | 0.02760000   | 0.00000000      |
| 4    | 31.64830000  | 0.28500000   | 0.00000000      |
| 5    | 40.10130000  | 0.25690000   | 0.00000000      |
| 6    | 49.25880000  | 0.03500000   | 0.00000000      |
| 7    | 58.29700000  | 0.43240000   | 0.00000000      |
| 8    | 80.28660000  | 0.49030000   | 0.00000000      |

|    |              |             |            |
|----|--------------|-------------|------------|
| 9  | 96.89920000  | 0.21500000  | 0.00000000 |
| 10 | 104.95340000 | 0.27990000  | 0.00000000 |
| 11 | 147.41730000 | 1.34690000  | 0.00000000 |
| 12 | 164.72260000 | 4.73330000  | 0.00000000 |
| 13 | 172.42360000 | 2.25640000  | 0.00000000 |
| 14 | 200.56410000 | 0.35180000  | 0.00000000 |
| 15 | 203.88290000 | 0.08620000  | 0.00000000 |
| 16 | 220.44500000 | 1.68360000  | 0.00000000 |
| 17 | 232.67250000 | 0.73070000  | 0.00000000 |
| 18 | 242.88760000 | 0.42070000  | 0.00000000 |
| 19 | 255.17720000 | 0.21610000  | 0.00000000 |
| 20 | 272.87350000 | 0.25480000  | 0.00000000 |
| 21 | 276.26580000 | 8.10970000  | 0.00000000 |
| 22 | 285.88120000 | 0.93880000  | 0.00000000 |
| 23 | 294.18350000 | 0.84460000  | 0.00000000 |
| 24 | 313.26670000 | 0.94690000  | 0.00000000 |
| 25 | 323.91740000 | 6.10470000  | 0.00000000 |
| 26 | 324.77070000 | 1.85580000  | 0.00000000 |
| 27 | 337.90110000 | 10.44650000 | 0.00000000 |
| 28 | 345.76090000 | 0.51960000  | 0.00000000 |
| 29 | 358.97000000 | 0.84990000  | 0.00000000 |
| 30 | 360.92220000 | 2.60300000  | 0.00000000 |
| 31 | 401.58570000 | 1.09850000  | 0.00000000 |
| 32 | 414.70290000 | 2.88770000  | 0.00000000 |
| 33 | 416.92740000 | 0.63760000  | 0.00000000 |
| 34 | 418.72410000 | 0.41170000  | 0.00000000 |
| 35 | 438.06890000 | 2.80200000  | 0.00000000 |
| 36 | 456.54960000 | 2.45310000  | 0.00000000 |
| 37 | 471.32930000 | 0.49880000  | 0.00000000 |
| 38 | 477.04450000 | 6.01730000  | 0.00000000 |
| 39 | 485.27830000 | 16.07920000 | 0.00000000 |
| 40 | 518.29740000 | 9.37050000  | 0.00000000 |
| 41 | 540.24140000 | 1.67980000  | 0.00000000 |
| 42 | 576.89810000 | 17.45930000 | 0.00000000 |
| 43 | 587.10010000 | 3.38160000  | 0.00000000 |
| 44 | 606.68860000 | 16.06280000 | 0.00000000 |
| 45 | 637.86350000 | 0.53750000  | 0.00000000 |
| 46 | 638.23990000 | 0.09970000  | 0.00000000 |
| 47 | 687.73260000 | 11.23230000 | 0.00000000 |
| 48 | 710.59950000 | 46.99210000 | 0.00000000 |
| 49 | 718.15270000 | 52.67330000 | 0.00000000 |
| 50 | 719.14920000 | 55.09870000 | 0.00000000 |
| 51 | 738.97150000 | 6.35180000  | 0.00000000 |

|    |               |              |            |
|----|---------------|--------------|------------|
| 52 | 754.90250000  | 31.21800000  | 0.00000000 |
| 53 | 773.32120000  | 4.27770000   | 0.00000000 |
| 54 | 783.32850000  | 27.72650000  | 0.00000000 |
| 55 | 794.80640000  | 13.39010000  | 0.00000000 |
| 56 | 814.72520000  | 10.93940000  | 0.00000000 |
| 57 | 835.03110000  | 11.64760000  | 0.00000000 |
| 58 | 849.80950000  | 37.88930000  | 0.00000000 |
| 59 | 858.46280000  | 0.17840000   | 0.00000000 |
| 60 | 862.28320000  | 25.07740000  | 0.00000000 |
| 61 | 864.00620000  | 0.05530000   | 0.00000000 |
| 62 | 905.29230000  | 7.80120000   | 0.00000000 |
| 63 | 928.19720000  | 9.41390000   | 0.00000000 |
| 64 | 931.94200000  | 1.40340000   | 0.00000000 |
| 65 | 932.55900000  | 0.21260000   | 0.00000000 |
| 66 | 933.21740000  | 0.07960000   | 0.00000000 |
| 67 | 939.92300000  | 13.00820000  | 0.00000000 |
| 68 | 961.83930000  | 5.82990000   | 0.00000000 |
| 69 | 973.59730000  | 0.08550000   | 0.00000000 |
| 70 | 974.84520000  | 103.24930000 | 0.00000000 |
| 71 | 979.11010000  | 4.64480000   | 0.00000000 |
| 72 | 982.22230000  | 33.52370000  | 0.00000000 |
| 73 | 982.68490000  | 1.70740000   | 0.00000000 |
| 74 | 994.68530000  | 5.80540000   | 0.00000000 |
| 75 | 997.97010000  | 2.73390000   | 0.00000000 |
| 76 | 1021.59820000 | 7.83780000   | 0.00000000 |
| 77 | 1025.07280000 | 25.40630000  | 0.00000000 |
| 78 | 1025.53270000 | 1.51670000   | 0.00000000 |
| 79 | 1027.21740000 | 32.13840000  | 0.00000000 |
| 80 | 1053.04810000 | 5.56790000   | 0.00000000 |
| 81 | 1053.19650000 | 20.27470000  | 0.00000000 |
| 82 | 1054.24170000 | 3.02350000   | 0.00000000 |
| 83 | 1058.58890000 | 6.81640000   | 0.00000000 |
| 84 | 1066.36650000 | 11.52810000  | 0.00000000 |
| 85 | 1095.19360000 | 24.84150000  | 0.00000000 |
| 86 | 1103.33080000 | 19.03640000  | 0.00000000 |
| 87 | 1112.38420000 | 26.85310000  | 0.00000000 |
| 88 | 1124.46580000 | 5.57430000   | 0.00000000 |
| 89 | 1134.32930000 | 42.34890000  | 0.00000000 |
| 90 | 1151.94270000 | 22.09490000  | 0.00000000 |
| 91 | 1158.21320000 | 138.27200000 | 0.00000000 |
| 92 | 1175.82740000 | 672.56880000 | 0.00000000 |
| 93 | 1179.01810000 | 17.07450000  | 0.00000000 |
| 94 | 1179.57740000 | 1.93410000   | 0.00000000 |



|     |               |              |            |
|-----|---------------|--------------|------------|
| 95  | 1199.23900000 | 15.14130000  | 0.00000000 |
| 96  | 1203.63090000 | 67.33650000  | 0.00000000 |
| 97  | 1205.54800000 | 7.58110000   | 0.00000000 |
| 98  | 1207.88070000 | 20.18620000  | 0.00000000 |
| 99  | 1227.23410000 | 11.82710000  | 0.00000000 |
| 100 | 1249.43140000 | 226.53450000 | 0.00000000 |
| 101 | 1266.42200000 | 240.82550000 | 0.00000000 |
| 102 | 1269.67720000 | 8.65470000   | 0.00000000 |
| 103 | 1272.24760000 | 26.81630000  | 0.00000000 |
| 104 | 1283.46540000 | 18.10090000  | 0.00000000 |
| 105 | 1313.71400000 | 94.65010000  | 0.00000000 |
| 106 | 1316.67120000 | 71.06960000  | 0.00000000 |
| 107 | 1329.80230000 | 3.17810000   | 0.00000000 |
| 108 | 1340.06150000 | 9.94120000   | 0.00000000 |
| 109 | 1345.61310000 | 20.64770000  | 0.00000000 |
| 110 | 1358.47740000 | 0.50970000   | 0.00000000 |
| 111 | 1361.25940000 | 3.26290000   | 0.00000000 |
| 112 | 1377.61710000 | 22.23750000  | 0.00000000 |
| 113 | 1393.07330000 | 59.13230000  | 0.00000000 |
| 114 | 1396.26740000 | 12.23900000  | 0.00000000 |
| 115 | 1398.66050000 | 25.25120000  | 0.00000000 |
| 116 | 1401.61280000 | 42.11230000  | 0.00000000 |
| 117 | 1405.51370000 | 26.02580000  | 0.00000000 |
| 118 | 1413.12050000 | 11.89360000  | 0.00000000 |
| 119 | 1425.23540000 | 19.95970000  | 0.00000000 |
| 120 | 1427.08090000 | 3.26550000   | 0.00000000 |
| 121 | 1467.93560000 | 0.19730000   | 0.00000000 |
| 122 | 1479.10460000 | 6.22920000   | 0.00000000 |
| 123 | 1480.52860000 | 13.02210000  | 0.00000000 |
| 124 | 1483.06370000 | 9.73410000   | 0.00000000 |
| 125 | 1484.04820000 | 0.14670000   | 0.00000000 |
| 126 | 1484.52070000 | 2.47450000   | 0.00000000 |
| 127 | 1486.95690000 | 1.23660000   | 0.00000000 |
| 128 | 1489.23810000 | 17.81790000  | 0.00000000 |
| 129 | 1493.10530000 | 0.70100000   | 0.00000000 |
| 130 | 1497.52560000 | 2.39580000   | 0.00000000 |
| 131 | 1498.03630000 | 2.16120000   | 0.00000000 |
| 132 | 1503.68360000 | 3.40110000   | 0.00000000 |
| 133 | 1510.57460000 | 11.23690000  | 0.00000000 |
| 134 | 1516.76860000 | 26.89710000  | 0.00000000 |
| 135 | 1517.49730000 | 35.61960000  | 0.00000000 |
| 136 | 1531.29280000 | 20.40090000  | 0.00000000 |
| 137 | 1534.06120000 | 16.20940000  | 0.00000000 |

|     |               |              |            |
|-----|---------------|--------------|------------|
| 138 | 1624.09060000 | 0.59340000   | 0.00000000 |
| 139 | 1625.47950000 | 1.06550000   | 0.00000000 |
| 140 | 1644.35740000 | 8.31600000   | 0.00000000 |
| 141 | 1645.52360000 | 7.21370000   | 0.00000000 |
| 142 | 1726.29590000 | 395.72150000 | 0.00000000 |
| 143 | 2973.86810000 | 38.89560000  | 0.00000000 |
| 144 | 2977.10650000 | 106.73110000 | 0.00000000 |
| 145 | 3030.53410000 | 38.18050000  | 0.00000000 |
| 146 | 3041.37760000 | 34.42340000  | 0.00000000 |
| 147 | 3042.80300000 | 16.18080000  | 0.00000000 |
| 148 | 3045.28450000 | 32.07460000  | 0.00000000 |
| 149 | 3045.30610000 | 32.60470000  | 0.00000000 |
| 150 | 3050.47440000 | 30.32670000  | 0.00000000 |
| 151 | 3051.58530000 | 19.07330000  | 0.00000000 |
| 152 | 3087.64220000 | 36.20100000  | 0.00000000 |
| 153 | 3091.02250000 | 41.91370000  | 0.00000000 |
| 154 | 3104.87320000 | 6.65670000   | 0.00000000 |
| 155 | 3105.91100000 | 5.24350000   | 0.00000000 |
| 156 | 3106.04630000 | 21.72160000  | 0.00000000 |
| 157 | 3111.73520000 | 79.27180000  | 0.00000000 |
| 158 | 3113.33880000 | 42.98830000  | 0.00000000 |
| 159 | 3117.51820000 | 33.10190000  | 0.00000000 |
| 160 | 3118.51990000 | 58.30760000  | 0.00000000 |
| 161 | 3121.22690000 | 40.45160000  | 0.00000000 |
| 162 | 3132.83570000 | 35.15600000  | 0.00000000 |
| 163 | 3143.02000000 | 1.54950000   | 0.00000000 |
| 164 | 3146.04230000 | 26.45780000  | 0.00000000 |
| 165 | 3165.95950000 | 0.63350000   | 0.00000000 |
| 166 | 3166.84090000 | 0.30430000   | 0.00000000 |
| 167 | 3174.25880000 | 18.67210000  | 0.00000000 |
| 168 | 3175.51620000 | 20.53940000  | 0.00000000 |
| 169 | 3188.34950000 | 32.42830000  | 0.00000000 |
| 170 | 3189.24290000 | 31.22620000  | 0.00000000 |
| 171 | 3197.56500000 | 12.65000000  | 0.00000000 |
| 172 | 3197.98450000 | 17.51440000  | 0.00000000 |
| 173 | 3203.78520000 | 14.12930000  | 0.00000000 |
| 174 | 3228.74960000 | 9.50000000   | 0.00000000 |

## Axial Anticlockwise Transition State

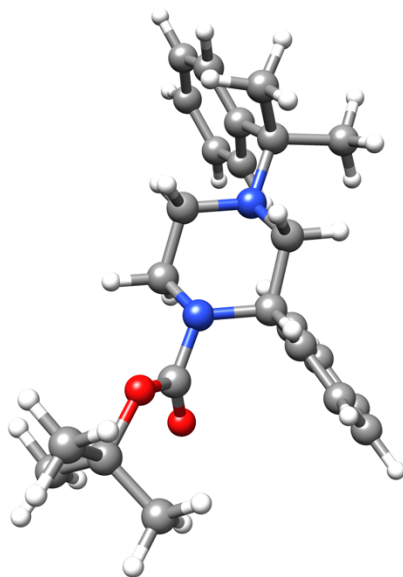

Route : # opt freq b3lyp scrf=(solvent=thf) geom=connectivity def2tzvp  
empiricaldispersion=gd3bj int=ultrafine pop=(regular,mk)  
SMILES : CC(C)(C)OC(=O)N2CCN(C(C)(C)c1cccc1)CC2c3cccc3  
Formula : C<sub>24</sub>H<sub>32</sub>N<sub>2</sub>O<sub>2</sub>  
Charge : 0  
Multiplicity : 1  
Dipole : 2.6170 Debye  
Energy : -1194.35848593 a.u.  
Gibbs Energy : -1193.896321 a.u.  
Number of imaginary frequencies : 1

### Cartesian Coordinates (XYZ format)

60

|   |             |             |             |
|---|-------------|-------------|-------------|
| C | -0.97462300 | -1.48585000 | 0.04757600  |
| C | 0.29926600  | -1.12107000 | -0.69163600 |
| C | 0.84721200  | 0.48818400  | 1.11607700  |
| C | -0.47208800 | 0.06942200  | 1.77845900  |
| H | 0.70317500  | -2.01168200 | -1.17642400 |
| H | -0.76229500 | -2.34316200 | 0.70551400  |
| H | -1.72788400 | -1.79523300 | -0.67505800 |
| H | 1.58021900  | 0.55542200  | 1.92333300  |
| H | -0.24034300 | -0.74332900 | 2.48509000  |
| H | -0.83703500 | 0.91735900  | 2.35054400  |
| H | 0.08741400  | -0.38193600 | -1.47294600 |
| N | 1.29342400  | -0.63829600 | 0.27042700  |
| N | -1.46608900 | -0.33513400 | 0.79570400  |
| C | -2.85843500 | -0.48164000 | 1.29744600  |
| C | -2.99457000 | -1.64436900 | 2.29366500  |
| H | -4.00097700 | -1.68585800 | 2.71037700  |
| H | -2.77736300 | -2.60861100 | 1.83524000  |
| H | -2.30344800 | -1.50025000 | 3.12389700  |
| C | -3.29160400 | 0.81426400  | 2.00784700  |

|   |             |             |             |
|---|-------------|-------------|-------------|
| H | -3.05016900 | 1.68804800  | 1.40326400  |
| H | -4.36919800 | 0.79230600  | 2.16764900  |
| H | -2.81533400 | 0.92035300  | 2.98218600  |
| C | -3.76788500 | -0.65023800 | 0.07405400  |
| C | -4.69806600 | -1.68007500 | -0.04136900 |
| C | -3.69175400 | 0.28384400  | -0.96296700 |
| C | -5.52491700 | -1.77923900 | -1.15861600 |
| H | -4.78746500 | -2.42396200 | 0.73665700  |
| C | -4.51128100 | 0.18962600  | -2.07803500 |
| H | -2.97334600 | 1.08770900  | -0.89529100 |
| C | -5.43493200 | -0.84710400 | -2.18245500 |
| H | -6.23684100 | -2.59228000 | -1.22486600 |
| H | -4.42951800 | 0.92548800  | -2.86812200 |
| H | -6.07444800 | -0.92490800 | -3.05221500 |
| C | 0.79336000  | 1.86303600  | 0.47021200  |
| C | 1.72525800  | 2.82133600  | 0.86894900  |
| C | -0.15529800 | 2.22523400  | -0.48874500 |
| C | 1.72152300  | 4.10149500  | 0.32830400  |
| H | 2.47052800  | 2.55804100  | 1.61049000  |
| C | -0.16168600 | 3.50331000  | -1.03439900 |
| H | -0.89759200 | 1.50641900  | -0.79323300 |
| C | 0.77627100  | 4.44732100  | -0.63027400 |
| H | 2.45699200  | 4.82630100  | 0.65391900  |
| H | -0.90530300 | 3.76303900  | -1.77761800 |
| H | 0.76949200  | 5.44210000  | -1.05705800 |
| C | 2.58372500  | -0.48257400 | -0.30642500 |
| O | 2.90022500  | 0.38395100  | -1.08642300 |
| O | 3.38461500  | -1.45100900 | 0.13818800  |
| C | 4.78696200  | -1.57753200 | -0.32062700 |
| C | 4.82066100  | -1.81765700 | -1.82487900 |
| H | 4.49216300  | -0.94095400 | -2.37667800 |
| H | 5.84217400  | -2.05549000 | -2.12452900 |
| H | 4.18404400  | -2.66395900 | -2.08718300 |
| C | 5.26981700  | -2.80872600 | 0.43396100  |
| H | 5.19740400  | -2.65122800 | 1.51043300  |
| H | 4.67193100  | -3.68090900 | 0.16811900  |
| H | 6.31096100  | -3.01122200 | 0.18203400  |
| C | 5.57884200  | -0.34396200 | 0.09540900  |
| H | 6.63535400  | -0.50947400 | -0.11995500 |
| H | 5.24852300  | 0.54131100  | -0.44130800 |
| H | 5.47356600  | -0.17118300 | 1.16750600  |

### Frequencies

| Mode | IR frequency | IR intensity | Raman intensity |
|------|--------------|--------------|-----------------|
| 1    | -52.34890000 | 1.49300000   | 0.00000000      |
| 2    | 22.48750000  | 0.14750000   | 0.00000000      |
| 3    | 24.82380000  | 0.08700000   | 0.00000000      |
| 4    | 36.19030000  | 0.19310000   | 0.00000000      |
| 5    | 41.61670000  | 0.31690000   | 0.00000000      |
| 6    | 48.03900000  | 0.24800000   | 0.00000000      |
| 7    | 58.63670000  | 0.08000000   | 0.00000000      |
| 8    | 74.59650000  | 0.86170000   | 0.00000000      |
| 9    | 100.67420000 | 0.15600000   | 0.00000000      |

|    |              |              |            |
|----|--------------|--------------|------------|
| 10 | 111.85030000 | 1.94080000   | 0.00000000 |
| 11 | 130.01240000 | 1.49620000   | 0.00000000 |
| 12 | 160.61840000 | 1.68140000   | 0.00000000 |
| 13 | 176.53010000 | 3.11180000   | 0.00000000 |
| 14 | 193.56230000 | 2.83440000   | 0.00000000 |
| 15 | 199.38430000 | 0.12290000   | 0.00000000 |
| 16 | 205.58620000 | 0.89590000   | 0.00000000 |
| 17 | 236.21540000 | 3.63270000   | 0.00000000 |
| 18 | 240.03910000 | 0.67920000   | 0.00000000 |
| 19 | 250.33130000 | 2.89640000   | 0.00000000 |
| 20 | 256.46810000 | 2.46840000   | 0.00000000 |
| 21 | 269.82580000 | 0.10050000   | 0.00000000 |
| 22 | 280.40370000 | 0.24630000   | 0.00000000 |
| 23 | 296.72610000 | 1.32070000   | 0.00000000 |
| 24 | 307.66250000 | 2.42540000   | 0.00000000 |
| 25 | 310.15070000 | 2.99190000   | 0.00000000 |
| 26 | 324.16860000 | 9.40360000   | 0.00000000 |
| 27 | 327.02330000 | 1.02090000   | 0.00000000 |
| 28 | 328.54870000 | 0.42880000   | 0.00000000 |
| 29 | 357.64630000 | 0.44270000   | 0.00000000 |
| 30 | 361.67440000 | 2.85320000   | 0.00000000 |
| 31 | 379.82170000 | 1.62000000   | 0.00000000 |
| 32 | 411.87910000 | 0.23640000   | 0.00000000 |
| 33 | 417.95070000 | 0.22850000   | 0.00000000 |
| 34 | 420.55510000 | 1.55410000   | 0.00000000 |
| 35 | 422.67030000 | 4.07290000   | 0.00000000 |
| 36 | 451.94990000 | 0.78760000   | 0.00000000 |
| 37 | 474.58510000 | 6.71240000   | 0.00000000 |
| 38 | 485.51010000 | 3.78140000   | 0.00000000 |
| 39 | 498.98470000 | 8.47580000   | 0.00000000 |
| 40 | 523.19600000 | 12.11860000  | 0.00000000 |
| 41 | 538.36960000 | 6.81520000   | 0.00000000 |
| 42 | 577.91960000 | 19.98440000  | 0.00000000 |
| 43 | 584.14140000 | 5.16870000   | 0.00000000 |
| 44 | 618.50290000 | 15.76590000  | 0.00000000 |
| 45 | 637.10160000 | 0.81350000   | 0.00000000 |
| 46 | 638.82930000 | 0.44620000   | 0.00000000 |
| 47 | 676.70670000 | 27.76580000  | 0.00000000 |
| 48 | 715.10970000 | 111.92240000 | 0.00000000 |
| 49 | 716.75160000 | 12.38690000  | 0.00000000 |
| 50 | 718.19810000 | 23.69070000  | 0.00000000 |
| 51 | 755.94800000 | 24.95300000  | 0.00000000 |
| 52 | 773.12300000 | 5.47240000   | 0.00000000 |

|    |               |              |            |
|----|---------------|--------------|------------|
| 53 | 775.76740000  | 20.86020000  | 0.00000000 |
| 54 | 793.73300000  | 11.36800000  | 0.00000000 |
| 55 | 795.27560000  | 39.08130000  | 0.00000000 |
| 56 | 814.45000000  | 2.03320000   | 0.00000000 |
| 57 | 825.55680000  | 1.24390000   | 0.00000000 |
| 58 | 849.59830000  | 34.68280000  | 0.00000000 |
| 59 | 859.29030000  | 21.65260000  | 0.00000000 |
| 60 | 859.91250000  | 13.24390000  | 0.00000000 |
| 61 | 861.69170000  | 0.87770000   | 0.00000000 |
| 62 | 909.52560000  | 8.65980000   | 0.00000000 |
| 63 | 931.99390000  | 11.42850000  | 0.00000000 |
| 64 | 932.79800000  | 0.20180000   | 0.00000000 |
| 65 | 933.17080000  | 0.04320000   | 0.00000000 |
| 66 | 934.10640000  | 1.13750000   | 0.00000000 |
| 67 | 940.80710000  | 12.91370000  | 0.00000000 |
| 68 | 960.47800000  | 55.85390000  | 0.00000000 |
| 69 | 974.22630000  | 0.04760000   | 0.00000000 |
| 70 | 978.93150000  | 1.55570000   | 0.00000000 |
| 71 | 983.36100000  | 0.12760000   | 0.00000000 |
| 72 | 990.42710000  | 30.04220000  | 0.00000000 |
| 73 | 993.74860000  | 1.65640000   | 0.00000000 |
| 74 | 995.30720000  | 11.84320000  | 0.00000000 |
| 75 | 998.57270000  | 5.24870000   | 0.00000000 |
| 76 | 1019.09910000 | 41.51840000  | 0.00000000 |
| 77 | 1022.15660000 | 0.41310000   | 0.00000000 |
| 78 | 1026.48370000 | 5.55070000   | 0.00000000 |
| 79 | 1029.18360000 | 9.06530000   | 0.00000000 |
| 80 | 1053.09180000 | 18.49240000  | 0.00000000 |
| 81 | 1053.30210000 | 0.75260000   | 0.00000000 |
| 82 | 1057.75880000 | 7.60410000   | 0.00000000 |
| 83 | 1062.04220000 | 7.42970000   | 0.00000000 |
| 84 | 1090.09970000 | 17.07210000  | 0.00000000 |
| 85 | 1100.40410000 | 10.08130000  | 0.00000000 |
| 86 | 1107.41090000 | 6.09750000   | 0.00000000 |
| 87 | 1120.11480000 | 6.88090000   | 0.00000000 |
| 88 | 1125.75570000 | 81.35850000  | 0.00000000 |
| 89 | 1130.56540000 | 34.29050000  | 0.00000000 |
| 90 | 1147.58790000 | 127.67380000 | 0.00000000 |
| 91 | 1164.42620000 | 10.40120000  | 0.00000000 |
| 92 | 1175.42710000 | 726.11590000 | 0.00000000 |
| 93 | 1179.52290000 | 0.47160000   | 0.00000000 |
| 94 | 1180.15330000 | 0.55230000   | 0.00000000 |
| 95 | 1198.21620000 | 71.96190000  | 0.00000000 |

|     |               |              |            |
|-----|---------------|--------------|------------|
| 96  | 1206.14380000 | 2.36300000   | 0.00000000 |
| 97  | 1207.97660000 | 13.77020000  | 0.00000000 |
| 98  | 1209.74860000 | 30.30770000  | 0.00000000 |
| 99  | 1227.72330000 | 30.07210000  | 0.00000000 |
| 100 | 1247.58050000 | 115.02500000 | 0.00000000 |
| 101 | 1271.82380000 | 20.70660000  | 0.00000000 |
| 102 | 1274.89940000 | 194.91280000 | 0.00000000 |
| 103 | 1280.01920000 | 40.09930000  | 0.00000000 |
| 104 | 1284.25360000 | 31.72890000  | 0.00000000 |
| 105 | 1296.20800000 | 223.91570000 | 0.00000000 |
| 106 | 1319.99830000 | 90.90690000  | 0.00000000 |
| 107 | 1330.29760000 | 2.64910000   | 0.00000000 |
| 108 | 1344.07730000 | 9.99850000   | 0.00000000 |
| 109 | 1352.04080000 | 10.10060000  | 0.00000000 |
| 110 | 1358.88910000 | 0.88330000   | 0.00000000 |
| 111 | 1363.41110000 | 21.21250000  | 0.00000000 |
| 112 | 1380.46920000 | 2.80260000   | 0.00000000 |
| 113 | 1397.26290000 | 31.44280000  | 0.00000000 |
| 114 | 1399.18690000 | 24.36780000  | 0.00000000 |
| 115 | 1401.56500000 | 24.07030000  | 0.00000000 |
| 116 | 1402.09700000 | 9.92820000   | 0.00000000 |
| 117 | 1413.08730000 | 2.49860000   | 0.00000000 |
| 118 | 1414.57280000 | 8.19280000   | 0.00000000 |
| 119 | 1425.27080000 | 18.23220000  | 0.00000000 |
| 120 | 1428.77070000 | 11.09050000  | 0.00000000 |
| 121 | 1467.57760000 | 0.17390000   | 0.00000000 |
| 122 | 1479.42620000 | 11.44770000  | 0.00000000 |
| 123 | 1483.34110000 | 0.14430000   | 0.00000000 |
| 124 | 1484.15490000 | 2.37700000   | 0.00000000 |
| 125 | 1484.35520000 | 2.23220000   | 0.00000000 |
| 126 | 1488.74590000 | 18.40350000  | 0.00000000 |
| 127 | 1488.94530000 | 0.46240000   | 0.00000000 |
| 128 | 1491.98330000 | 9.14300000   | 0.00000000 |
| 129 | 1493.77450000 | 0.79380000   | 0.00000000 |
| 130 | 1497.90760000 | 2.17880000   | 0.00000000 |
| 131 | 1499.13330000 | 4.63030000   | 0.00000000 |
| 132 | 1506.82670000 | 9.66540000   | 0.00000000 |
| 133 | 1508.01230000 | 11.82250000  | 0.00000000 |
| 134 | 1511.07840000 | 7.12450000   | 0.00000000 |
| 135 | 1516.83760000 | 20.78300000  | 0.00000000 |
| 136 | 1531.30970000 | 16.43260000  | 0.00000000 |
| 137 | 1532.66020000 | 19.44650000  | 0.00000000 |
| 138 | 1624.39210000 | 0.53800000   | 0.00000000 |

|     |               |              |            |
|-----|---------------|--------------|------------|
| 139 | 1624.72190000 | 0.59310000   | 0.00000000 |
| 140 | 1644.81530000 | 7.15520000   | 0.00000000 |
| 141 | 1645.72240000 | 3.08550000   | 0.00000000 |
| 142 | 1739.89550000 | 411.29300000 | 0.00000000 |
| 143 | 2930.87340000 | 79.91910000  | 0.00000000 |
| 144 | 2938.36440000 | 144.46310000 | 0.00000000 |
| 145 | 2999.41060000 | 67.57250000  | 0.00000000 |
| 146 | 3041.76810000 | 39.36460000  | 0.00000000 |
| 147 | 3042.53740000 | 15.50400000  | 0.00000000 |
| 148 | 3045.32640000 | 25.82090000  | 0.00000000 |
| 149 | 3045.38000000 | 37.23170000  | 0.00000000 |
| 150 | 3050.45670000 | 27.70000000  | 0.00000000 |
| 151 | 3051.39320000 | 19.44690000  | 0.00000000 |
| 152 | 3070.70680000 | 45.41310000  | 0.00000000 |
| 153 | 3100.73170000 | 24.57480000  | 0.00000000 |
| 154 | 3104.94700000 | 6.63560000   | 0.00000000 |
| 155 | 3105.84570000 | 22.17850000  | 0.00000000 |
| 156 | 3107.49650000 | 1.87850000   | 0.00000000 |
| 157 | 3111.96610000 | 76.17320000  | 0.00000000 |
| 158 | 3112.96280000 | 43.36510000  | 0.00000000 |
| 159 | 3116.19460000 | 39.99590000  | 0.00000000 |
| 160 | 3118.18380000 | 57.45790000  | 0.00000000 |
| 161 | 3120.35200000 | 31.85240000  | 0.00000000 |
| 162 | 3131.68020000 | 32.80060000  | 0.00000000 |
| 163 | 3143.60010000 | 1.42970000   | 0.00000000 |
| 164 | 3146.42030000 | 26.42460000  | 0.00000000 |
| 165 | 3158.28300000 | 11.74930000  | 0.00000000 |
| 166 | 3167.93260000 | 0.41520000   | 0.00000000 |
| 167 | 3168.21280000 | 1.46210000   | 0.00000000 |
| 168 | 3176.25890000 | 18.37280000  | 0.00000000 |
| 169 | 3178.03240000 | 40.04700000  | 0.00000000 |
| 170 | 3190.67770000 | 36.35600000  | 0.00000000 |
| 171 | 3191.44280000 | 32.52360000  | 0.00000000 |
| 172 | 3207.06320000 | 23.07640000  | 0.00000000 |
| 173 | 3208.62750000 | 0.33920000   | 0.00000000 |
| 174 | 3240.04970000 | 2.71440000   | 0.00000000 |



## Equatorial Clockwise Transition State

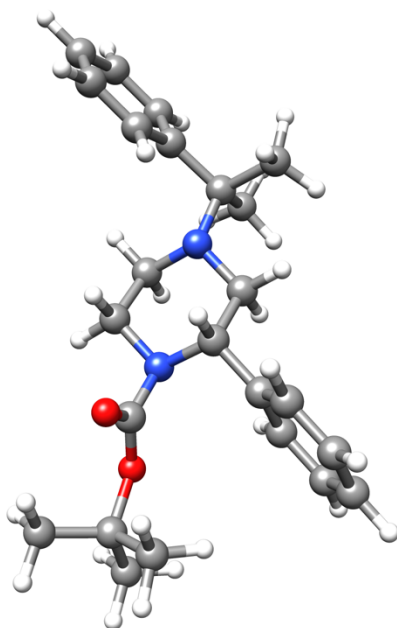

Route : # opt freq b3lyp scrf=(solvent=thf) geom=connectivity def2tzvp  
empiricaldispersion=gd3bj int=ultrafine pop=(regular,mk)  
SMILES : CC(C)(C)OC(=O)N2CCN(C(C)(C)c1cccc1)CC2c3cccc3  
Formula : C<sub>24</sub>H<sub>32</sub>N<sub>2</sub>O<sub>2</sub>  
Charge : 0  
Multiplicity : 1  
Dipole : 2.3097 Debye  
Energy : -1194.36728384 a.u.  
Gibbs Energy : -1193.905163 a.u.  
Number of imaginary frequencies : 1

### Cartesian Coordinates (XYZ format)

60

|   |             |             |             |
|---|-------------|-------------|-------------|
| C | 0.69346100  | 1.31528100  | 0.24194500  |
| C | -0.51652900 | 0.65391500  | -0.42184600 |
| C | 0.39305800  | -1.50896200 | 0.20940600  |
| C | 1.56680800  | -0.81031400 | 0.86694500  |
| H | 0.42080500  | 1.57897200  | 1.27574200  |
| H | 0.89026900  | 2.23937200  | -0.29507800 |
| H | 0.15910100  | -2.42753400 | 0.74975100  |
| H | 1.33079400  | -0.65031300 | 1.93020800  |
| H | 2.43996200  | -1.45866100 | 0.81222800  |
| H | -0.26091100 | 0.47646100  | -1.47452900 |
| N | -0.78451800 | -0.63091100 | 0.25525200  |
| N | 1.85172900  | 0.44034600  | 0.17464700  |
| C | 3.16243700  | 1.04418900  | 0.52386800  |
| C | 3.36863000  | 2.34153400  | -0.27933300 |
| H | 4.40661100  | 2.65904100  | -0.18491700 |
| H | 3.15368100  | 2.18056500  | -1.33581700 |
| H | 2.73944200  | 3.15133500  | 0.08986900  |
| C | 3.26142700  | 1.38320600  | 2.02051300  |
| H | 3.24325600  | 0.49139700  | 2.64615700  |

|   |             |             |             |
|---|-------------|-------------|-------------|
| H | 4.17724600  | 1.93193000  | 2.23966300  |
| H | 2.42433500  | 2.01930600  | 2.30864200  |
| C | 4.25231900  | 0.06430200  | 0.07108100  |
| C | 4.17011100  | -0.50407100 | -1.20308400 |
| C | 5.35708800  | -0.24955000 | 0.85906000  |
| C | 5.15704400  | -1.35880000 | -1.67253300 |
| H | 3.30841600  | -0.28331100 | -1.81740800 |
| C | 6.35112700  | -1.10666900 | 0.39182600  |
| H | 5.45620200  | 0.16748400  | 1.85073700  |
| C | 6.25625700  | -1.66555900 | -0.87493700 |
| H | 5.06816100  | -1.78924400 | -2.66218800 |
| H | 7.19797400  | -1.33757300 | 1.02576100  |
| H | 7.02634000  | -2.33413100 | -1.23771000 |
| C | -1.93839100 | -1.26449100 | -0.30624000 |
| O | -2.04619200 | -1.57507000 | -1.46979500 |
| O | -2.85429700 | -1.44210500 | 0.63578400  |
| C | -4.21528600 | -1.93408300 | 0.31978200  |
| C | -4.88662800 | -0.96913800 | -0.65069300 |
| H | -4.42149200 | -1.00170300 | -1.63234000 |
| H | -5.93735700 | -1.24331000 | -0.75389000 |
| H | -4.83232500 | 0.05058200  | -0.26782900 |
| C | -4.90008400 | -1.89478100 | 1.67883800  |
| H | -4.38176200 | -2.53994300 | 2.38882000  |
| H | -4.90884000 | -0.87805700 | 2.07226200  |
| H | -5.92963800 | -2.24009100 | 1.58326000  |
| C | -4.14541500 | -3.35872000 | -0.21403800 |
| H | -5.15799800 | -3.75260900 | -0.31237200 |
| H | -3.66139900 | -3.39507700 | -1.18637400 |
| H | -3.59838000 | -3.99749400 | 0.48097500  |
| H | 0.65409000  | -1.77022800 | -0.82473900 |
| C | -1.73397500 | 1.54522300  | -0.36569900 |
| C | -2.36835000 | 1.81679700  | 0.84723400  |
| C | -2.24729300 | 2.10522700  | -1.53260200 |
| C | -3.49000000 | 2.63410300  | 0.88984400  |
| H | -1.99327300 | 1.36350600  | 1.75440000  |
| C | -3.36984000 | 2.92540500  | -1.49405900 |
| H | -1.77057200 | 1.88625200  | -2.48015700 |
| C | -3.99469800 | 3.19123700  | -0.28149600 |
| H | -3.97617300 | 2.83139500  | 1.83678000  |
| H | -3.76002400 | 3.34802600  | -2.41101100 |
| H | -4.87277900 | 3.82332000  | -0.24878600 |

### Frequencies

| Mode | IR frequency | IR intensity | Raman intensity |
|------|--------------|--------------|-----------------|
| 1    | -34.02480000 | 1.93850000   | 0.00000000      |
| 2    | 26.55080000  | 0.01600000   | 0.00000000      |
| 3    | 30.26190000  | 0.20030000   | 0.00000000      |
| 4    | 32.97930000  | 0.02940000   | 0.00000000      |
| 5    | 39.47020000  | 0.06110000   | 0.00000000      |
| 6    | 51.35570000  | 0.19680000   | 0.00000000      |
| 7    | 58.12650000  | 0.66250000   | 0.00000000      |
| 8    | 78.42290000  | 1.08120000   | 0.00000000      |
| 9    | 101.09020000 | 0.48860000   | 0.00000000      |

|    |              |             |            |
|----|--------------|-------------|------------|
| 10 | 109.52420000 | 0.86210000  | 0.00000000 |
| 11 | 127.88390000 | 1.38930000  | 0.00000000 |
| 12 | 144.97130000 | 3.49850000  | 0.00000000 |
| 13 | 176.37720000 | 2.62100000  | 0.00000000 |
| 14 | 187.97980000 | 1.41970000  | 0.00000000 |
| 15 | 205.58500000 | 0.18530000  | 0.00000000 |
| 16 | 209.25510000 | 0.07750000  | 0.00000000 |
| 17 | 218.35920000 | 3.76340000  | 0.00000000 |
| 18 | 243.32240000 | 0.34540000  | 0.00000000 |
| 19 | 253.91430000 | 0.68140000  | 0.00000000 |
| 20 | 260.62720000 | 1.06960000  | 0.00000000 |
| 21 | 272.53020000 | 1.59530000  | 0.00000000 |
| 22 | 272.81440000 | 5.84930000  | 0.00000000 |
| 23 | 297.51120000 | 1.80150000  | 0.00000000 |
| 24 | 309.43440000 | 2.15860000  | 0.00000000 |
| 25 | 313.53100000 | 0.38590000  | 0.00000000 |
| 26 | 324.01790000 | 8.74060000  | 0.00000000 |
| 27 | 327.62920000 | 0.27080000  | 0.00000000 |
| 28 | 337.93530000 | 0.14770000  | 0.00000000 |
| 29 | 356.58980000 | 0.48990000  | 0.00000000 |
| 30 | 358.83750000 | 1.69770000  | 0.00000000 |
| 31 | 382.46040000 | 1.19490000  | 0.00000000 |
| 32 | 415.49870000 | 0.44670000  | 0.00000000 |
| 33 | 415.67590000 | 1.82940000  | 0.00000000 |
| 34 | 417.62880000 | 0.30970000  | 0.00000000 |
| 35 | 423.16220000 | 3.81640000  | 0.00000000 |
| 36 | 453.81250000 | 2.31770000  | 0.00000000 |
| 37 | 474.89320000 | 5.68300000  | 0.00000000 |
| 38 | 483.61080000 | 2.87340000  | 0.00000000 |
| 39 | 512.24860000 | 2.12780000  | 0.00000000 |
| 40 | 526.80150000 | 5.07740000  | 0.00000000 |
| 41 | 530.60400000 | 13.13860000 | 0.00000000 |
| 42 | 552.02180000 | 11.54390000 | 0.00000000 |
| 43 | 582.00970000 | 22.89440000 | 0.00000000 |
| 44 | 612.04090000 | 12.11970000 | 0.00000000 |
| 45 | 636.89920000 | 0.60660000  | 0.00000000 |
| 46 | 638.02010000 | 0.47170000  | 0.00000000 |
| 47 | 647.74570000 | 2.10400000  | 0.00000000 |
| 48 | 714.54610000 | 66.67430000 | 0.00000000 |
| 49 | 716.66480000 | 76.62280000 | 0.00000000 |
| 50 | 733.12890000 | 2.08150000  | 0.00000000 |
| 51 | 749.45190000 | 30.40730000 | 0.00000000 |
| 52 | 759.96510000 | 7.71860000  | 0.00000000 |

|    |               |              |            |
|----|---------------|--------------|------------|
| 53 | 778.95360000  | 9.52560000   | 0.00000000 |
| 54 | 786.69400000  | 51.38060000  | 0.00000000 |
| 55 | 807.14760000  | 10.63380000  | 0.00000000 |
| 56 | 811.71600000  | 8.20320000   | 0.00000000 |
| 57 | 841.24800000  | 16.18510000  | 0.00000000 |
| 58 | 854.65740000  | 40.95660000  | 0.00000000 |
| 59 | 860.84270000  | 1.30020000   | 0.00000000 |
| 60 | 861.59800000  | 0.45760000   | 0.00000000 |
| 61 | 875.49410000  | 13.18600000  | 0.00000000 |
| 62 | 911.07320000  | 8.39570000   | 0.00000000 |
| 63 | 932.80560000  | 1.06780000   | 0.00000000 |
| 64 | 933.19350000  | 0.42530000   | 0.00000000 |
| 65 | 933.85170000  | 1.76880000   | 0.00000000 |
| 66 | 936.49590000  | 10.08890000  | 0.00000000 |
| 67 | 941.23560000  | 15.34710000  | 0.00000000 |
| 68 | 947.82070000  | 12.27170000  | 0.00000000 |
| 69 | 974.46790000  | 0.09370000   | 0.00000000 |
| 70 | 982.75420000  | 0.22380000   | 0.00000000 |
| 71 | 983.15920000  | 0.08920000   | 0.00000000 |
| 72 | 989.48460000  | 36.00490000  | 0.00000000 |
| 73 | 998.56140000  | 0.41220000   | 0.00000000 |
| 74 | 1002.53630000 | 0.50610000   | 0.00000000 |
| 75 | 1014.65020000 | 87.93010000  | 0.00000000 |
| 76 | 1021.38120000 | 3.11550000   | 0.00000000 |
| 77 | 1025.91400000 | 0.43700000   | 0.00000000 |
| 78 | 1026.08110000 | 1.92000000   | 0.00000000 |
| 79 | 1050.30970000 | 6.73560000   | 0.00000000 |
| 80 | 1053.00120000 | 25.11460000  | 0.00000000 |
| 81 | 1053.75760000 | 1.91860000   | 0.00000000 |
| 82 | 1054.95420000 | 2.40650000   | 0.00000000 |
| 83 | 1066.53740000 | 9.18910000   | 0.00000000 |
| 84 | 1091.81820000 | 7.66800000   | 0.00000000 |
| 85 | 1099.97530000 | 17.70370000  | 0.00000000 |
| 86 | 1104.44000000 | 14.28190000  | 0.00000000 |
| 87 | 1122.94440000 | 13.56050000  | 0.00000000 |
| 88 | 1128.76240000 | 64.58560000  | 0.00000000 |
| 89 | 1133.40050000 | 41.72580000  | 0.00000000 |
| 90 | 1146.67540000 | 37.60910000  | 0.00000000 |
| 91 | 1161.56620000 | 4.64060000   | 0.00000000 |
| 92 | 1179.54190000 | 307.15110000 | 0.00000000 |
| 93 | 1179.72830000 | 135.32130000 | 0.00000000 |
| 94 | 1180.28070000 | 189.33710000 | 0.00000000 |
| 95 | 1198.82990000 | 3.34540000   | 0.00000000 |

|     |               |              |            |
|-----|---------------|--------------|------------|
| 96  | 1203.12210000 | 86.16310000  | 0.00000000 |
| 97  | 1206.12100000 | 18.38400000  | 0.00000000 |
| 98  | 1224.89430000 | 8.41830000   | 0.00000000 |
| 99  | 1229.91270000 | 21.49870000  | 0.00000000 |
| 100 | 1248.95850000 | 3.95900000   | 0.00000000 |
| 101 | 1269.18710000 | 371.46080000 | 0.00000000 |
| 102 | 1272.34420000 | 30.66370000  | 0.00000000 |
| 103 | 1278.63960000 | 119.16650000 | 0.00000000 |
| 104 | 1284.72680000 | 34.06240000  | 0.00000000 |
| 105 | 1286.11300000 | 50.34360000  | 0.00000000 |
| 106 | 1322.79770000 | 45.95800000  | 0.00000000 |
| 107 | 1329.96940000 | 2.64420000   | 0.00000000 |
| 108 | 1332.72440000 | 63.00810000  | 0.00000000 |
| 109 | 1349.52200000 | 1.42020000   | 0.00000000 |
| 110 | 1358.20900000 | 4.93970000   | 0.00000000 |
| 111 | 1359.70700000 | 15.59310000  | 0.00000000 |
| 112 | 1380.77170000 | 24.77440000  | 0.00000000 |
| 113 | 1392.86200000 | 11.84880000  | 0.00000000 |
| 114 | 1396.47720000 | 24.46170000  | 0.00000000 |
| 115 | 1399.55380000 | 24.51610000  | 0.00000000 |
| 116 | 1402.53350000 | 21.99970000  | 0.00000000 |
| 117 | 1410.27080000 | 11.75450000  | 0.00000000 |
| 118 | 1413.67840000 | 5.33270000   | 0.00000000 |
| 119 | 1425.91690000 | 20.62930000  | 0.00000000 |
| 120 | 1426.37160000 | 5.02970000   | 0.00000000 |
| 121 | 1468.30910000 | 0.38130000   | 0.00000000 |
| 122 | 1479.62380000 | 13.70930000  | 0.00000000 |
| 123 | 1484.06510000 | 2.14190000   | 0.00000000 |
| 124 | 1484.35460000 | 0.16300000   | 0.00000000 |
| 125 | 1485.30880000 | 1.98020000   | 0.00000000 |
| 126 | 1488.32540000 | 1.86920000   | 0.00000000 |
| 127 | 1490.00200000 | 5.04380000   | 0.00000000 |
| 128 | 1490.80170000 | 27.39970000  | 0.00000000 |
| 129 | 1492.68900000 | 0.10530000   | 0.00000000 |
| 130 | 1496.01300000 | 4.33010000   | 0.00000000 |
| 131 | 1497.99030000 | 2.66090000   | 0.00000000 |
| 132 | 1501.16210000 | 0.60620000   | 0.00000000 |
| 133 | 1507.13430000 | 17.10480000  | 0.00000000 |
| 134 | 1510.41360000 | 4.10490000   | 0.00000000 |
| 135 | 1517.42420000 | 23.08410000  | 0.00000000 |
| 136 | 1531.26250000 | 23.43550000  | 0.00000000 |
| 137 | 1532.56190000 | 12.08400000  | 0.00000000 |
| 138 | 1624.15700000 | 0.73380000   | 0.00000000 |

|     |               |              |            |
|-----|---------------|--------------|------------|
| 139 | 1627.82640000 | 1.28650000   | 0.00000000 |
| 140 | 1644.42130000 | 9.91480000   | 0.00000000 |
| 141 | 1648.00080000 | 3.03790000   | 0.00000000 |
| 142 | 1737.04140000 | 366.83860000 | 0.00000000 |
| 143 | 2940.96330000 | 49.50050000  | 0.00000000 |
| 144 | 2945.74930000 | 110.07400000 | 0.00000000 |
| 145 | 2979.99660000 | 38.11830000  | 0.00000000 |
| 146 | 2982.95610000 | 125.94270000 | 0.00000000 |
| 147 | 3043.05080000 | 15.25030000  | 0.00000000 |
| 148 | 3043.11020000 | 27.31130000  | 0.00000000 |
| 149 | 3045.83450000 | 29.18160000  | 0.00000000 |
| 150 | 3049.31260000 | 26.08110000  | 0.00000000 |
| 151 | 3052.24830000 | 22.53070000  | 0.00000000 |
| 152 | 3076.06320000 | 40.39440000  | 0.00000000 |
| 153 | 3098.97520000 | 29.73860000  | 0.00000000 |
| 154 | 3104.42330000 | 13.90900000  | 0.00000000 |
| 155 | 3106.54790000 | 3.47260000   | 0.00000000 |
| 156 | 3109.50500000 | 8.08770000   | 0.00000000 |
| 157 | 3110.53450000 | 79.26060000  | 0.00000000 |
| 158 | 3113.92900000 | 42.11870000  | 0.00000000 |
| 159 | 3115.85330000 | 34.70360000  | 0.00000000 |
| 160 | 3117.30240000 | 37.19500000  | 0.00000000 |
| 161 | 3119.40520000 | 53.68080000  | 0.00000000 |
| 162 | 3125.67110000 | 32.39430000  | 0.00000000 |
| 163 | 3143.21790000 | 0.19810000   | 0.00000000 |
| 164 | 3146.15720000 | 26.46330000  | 0.00000000 |
| 165 | 3166.75770000 | 0.84660000   | 0.00000000 |
| 166 | 3166.77470000 | 4.15760000   | 0.00000000 |
| 167 | 3172.71470000 | 1.76220000   | 0.00000000 |
| 168 | 3175.01130000 | 17.70120000  | 0.00000000 |
| 169 | 3182.05390000 | 29.88040000  | 0.00000000 |
| 170 | 3189.17590000 | 35.75830000  | 0.00000000 |
| 171 | 3192.46000000 | 31.99070000  | 0.00000000 |
| 172 | 3199.10100000 | 7.93540000   | 0.00000000 |
| 173 | 3199.30790000 | 15.09670000  | 0.00000000 |
| 174 | 3205.91800000 | 12.27370000  | 0.00000000 |

## Equatorial Anticlockwise Transition State

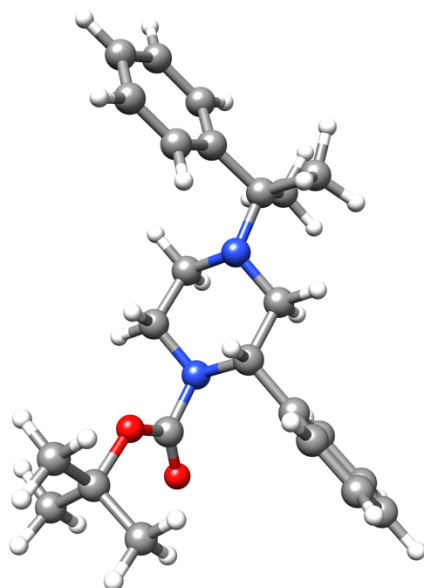

Route : # opt freq b3lyp scrf=(solvent=thf) geom=connectivity def2tzvp  
empiricaldispersion=gd3bj int=ultrafine pop=(regular,mk)  
SMILES : CC(C)(C)OC(=O)N2CCN(C(C)(C)c1cccc1)CC2c3cccc3  
Formula : C<sub>24</sub>H<sub>32</sub>N<sub>2</sub>O<sub>2</sub>  
Charge : 0  
Multiplicity : 1  
Dipole : 2.5981 Debye  
Energy : -1194.36566296 a.u.  
Gibbs Energy : -1193.903995 a.u.  
Number of imaginary frequencies : 1

### Cartesian Coordinates (XYZ format)

60

|   |             |             |             |
|---|-------------|-------------|-------------|
| C | 0.55574100  | -1.52764500 | -0.04376200 |
| C | -0.74415200 | -0.74140600 | 0.15097900  |
| C | 0.24702100  | 1.09522600  | -1.08145500 |
| C | 1.50590700  | 0.27359500  | -1.27761400 |
| H | 0.44303200  | -2.16843200 | -0.93183500 |
| H | 0.67022800  | -2.17591200 | 0.82090400  |
| H | 0.09810000  | 1.75558200  | -1.93661800 |
| H | 1.42916400  | -0.27131500 | -2.23081300 |
| H | 2.35986700  | 0.94609000  | -1.34446400 |
| H | -0.63853000 | -0.16425000 | 1.07972100  |
| N | -0.90925700 | 0.19213000  | -0.98689900 |
| N | 1.68916600  | -0.62485400 | -0.14472000 |
| C | 3.03866500  | -1.23827400 | -0.06538400 |
| C | 3.12420300  | -2.15225100 | 1.17065200  |
| H | 4.16520500  | -2.42398800 | 1.34252800  |
| H | 2.75267900  | -1.63913100 | 2.05782700  |
| H | 2.55922500  | -3.07413500 | 1.03292600  |
| C | 3.36440600  | -2.07990700 | -1.31053600 |
| H | 3.43992800  | -1.47027300 | -2.21038300 |

|   |             |             |             |
|---|-------------|-------------|-------------|
| H | 4.30378500  | -2.61857900 | -1.18666300 |
| H | 2.58162100  | -2.82244800 | -1.46634500 |
| C | 4.04444300  | -0.10073400 | 0.15328200  |
| C | 3.76643900  | 0.87865400  | 1.11072900  |
| C | 5.25666500  | -0.02586100 | -0.52839800 |
| C | 4.66796100  | 1.89937100  | 1.37598700  |
| H | 2.82095700  | 0.84176400  | 1.63359700  |
| C | 6.16565100  | 0.99662100  | -0.26503800 |
| H | 5.50762000  | -0.76267700 | -1.27755700 |
| C | 5.87623000  | 1.96388900  | 0.68717900  |
| H | 4.42746900  | 2.64833000  | 2.12022200  |
| H | 7.09953200  | 1.03439500  | -0.81163300 |
| H | 6.58032900  | 2.76052400  | 0.89025900  |
| C | -2.16520900 | 0.86594800  | -0.95982800 |
| O | -3.08934900 | 0.56337600  | -1.67202600 |
| O | -2.17353900 | 1.84609400  | -0.05340100 |
| C | -3.36857000 | 2.67940900  | 0.20539400  |
| C | -3.73979000 | 3.45671100  | -1.05082300 |
| H | -4.09253300 | 2.79552100  | -1.83787500 |
| H | -4.53239200 | 4.16628200  | -0.80948700 |
| H | -2.87930700 | 4.01917400  | -1.41607500 |
| C | -2.88539500 | 3.61850400  | 1.30155100  |
| H | -2.57544600 | 3.05336900  | 2.18104400  |
| H | -2.04034000 | 4.21286800  | 0.95279100  |
| H | -3.69025500 | 4.29499000  | 1.58959500  |
| C | -4.50314600 | 1.79553100  | 0.70796100  |
| H | -5.33534800 | 2.42697500  | 1.02198200  |
| H | -4.85191100 | 1.11756900  | -0.06648100 |
| H | -4.17422600 | 1.20966200  | 1.56705200  |
| H | 0.35327400  | 1.71196300  | -0.18129500 |
| C | -1.92458900 | -1.66762300 | 0.30237100  |
| C | -2.32679200 | -2.50496900 | -0.73868900 |
| C | -2.62315100 | -1.70903400 | 1.50606200  |
| C | -3.39988700 | -3.36948900 | -0.57376800 |
| H | -1.80922000 | -2.46090000 | -1.68710200 |
| C | -3.69962100 | -2.57385500 | 1.67558400  |
| H | -2.32376800 | -1.05494000 | 2.31599400  |
| C | -4.08948100 | -3.40775500 | 0.63516600  |
| H | -3.70406400 | -4.01104400 | -1.39092500 |
| H | -4.23381100 | -2.59167900 | 2.61688000  |
| H | -4.92840900 | -4.07999300 | 0.76136500  |

### Frequencies

| Mode | IR frequency | IR intensity | Raman intensity |
|------|--------------|--------------|-----------------|
| 1    | -36.76800000 | 1.71490000   | 0.00000000      |
| 2    | 24.67200000  | 0.15820000   | 0.00000000      |
| 3    | 27.96440000  | 0.47510000   | 0.00000000      |
| 4    | 32.01220000  | 0.00380000   | 0.00000000      |
| 5    | 39.12030000  | 0.12640000   | 0.00000000      |
| 6    | 44.14930000  | 0.08990000   | 0.00000000      |
| 7    | 57.60790000  | 0.92670000   | 0.00000000      |
| 8    | 82.40870000  | 0.56310000   | 0.00000000      |
| 9    | 93.99930000  | 0.98850000   | 0.00000000      |



|    |              |             |            |
|----|--------------|-------------|------------|
| 10 | 111.27340000 | 0.57180000  | 0.00000000 |
| 11 | 119.81530000 | 1.18940000  | 0.00000000 |
| 12 | 147.45940000 | 4.16500000  | 0.00000000 |
| 13 | 175.86480000 | 1.38700000  | 0.00000000 |
| 14 | 187.21040000 | 3.69430000  | 0.00000000 |
| 15 | 202.73550000 | 0.26660000  | 0.00000000 |
| 16 | 208.70280000 | 0.08560000  | 0.00000000 |
| 17 | 226.45890000 | 0.36480000  | 0.00000000 |
| 18 | 243.74040000 | 0.41820000  | 0.00000000 |
| 19 | 249.57130000 | 0.16250000  | 0.00000000 |
| 20 | 262.66820000 | 2.69010000  | 0.00000000 |
| 21 | 271.00980000 | 0.32220000  | 0.00000000 |
| 22 | 282.82400000 | 2.00010000  | 0.00000000 |
| 23 | 292.12820000 | 0.00400000  | 0.00000000 |
| 24 | 304.86180000 | 0.34350000  | 0.00000000 |
| 25 | 310.44030000 | 0.35840000  | 0.00000000 |
| 26 | 324.17250000 | 7.27230000  | 0.00000000 |
| 27 | 326.57550000 | 0.22190000  | 0.00000000 |
| 28 | 343.50330000 | 1.40420000  | 0.00000000 |
| 29 | 354.05240000 | 0.31960000  | 0.00000000 |
| 30 | 373.32490000 | 2.11300000  | 0.00000000 |
| 31 | 381.33060000 | 4.44800000  | 0.00000000 |
| 32 | 415.18180000 | 1.09740000  | 0.00000000 |
| 33 | 417.45150000 | 0.19740000  | 0.00000000 |
| 34 | 417.60660000 | 0.08510000  | 0.00000000 |
| 35 | 421.03190000 | 0.83160000  | 0.00000000 |
| 36 | 456.62980000 | 6.60510000  | 0.00000000 |
| 37 | 472.86480000 | 4.90120000  | 0.00000000 |
| 38 | 486.23160000 | 0.81410000  | 0.00000000 |
| 39 | 507.90740000 | 3.74950000  | 0.00000000 |
| 40 | 521.25780000 | 5.48100000  | 0.00000000 |
| 41 | 545.93300000 | 3.10360000  | 0.00000000 |
| 42 | 559.52320000 | 31.90730000 | 0.00000000 |
| 43 | 583.51560000 | 15.46080000 | 0.00000000 |
| 44 | 615.89510000 | 14.31610000 | 0.00000000 |
| 45 | 636.66200000 | 0.13860000  | 0.00000000 |
| 46 | 637.90850000 | 0.96510000  | 0.00000000 |
| 47 | 644.27490000 | 5.25790000  | 0.00000000 |
| 48 | 684.87550000 | 4.75890000  | 0.00000000 |
| 49 | 713.65510000 | 63.91590000 | 0.00000000 |
| 50 | 716.89640000 | 76.30030000 | 0.00000000 |
| 51 | 735.65300000 | 4.85710000  | 0.00000000 |
| 52 | 774.60370000 | 25.97330000 | 0.00000000 |

|    |               |              |            |
|----|---------------|--------------|------------|
| 53 | 784.83610000  | 17.96370000  | 0.00000000 |
| 54 | 786.95880000  | 33.09440000  | 0.00000000 |
| 55 | 805.39400000  | 6.74490000   | 0.00000000 |
| 56 | 811.71170000  | 12.76780000  | 0.00000000 |
| 57 | 840.76380000  | 3.91160000   | 0.00000000 |
| 58 | 855.68410000  | 53.80120000  | 0.00000000 |
| 59 | 858.55150000  | 0.66720000   | 0.00000000 |
| 60 | 861.89900000  | 0.31060000   | 0.00000000 |
| 61 | 880.03810000  | 8.70810000   | 0.00000000 |
| 62 | 910.75470000  | 6.26000000   | 0.00000000 |
| 63 | 932.53810000  | 1.69030000   | 0.00000000 |
| 64 | 933.03830000  | 2.65360000   | 0.00000000 |
| 65 | 933.11110000  | 0.26590000   | 0.00000000 |
| 66 | 934.34750000  | 7.35210000   | 0.00000000 |
| 67 | 941.56180000  | 13.95970000  | 0.00000000 |
| 68 | 950.01500000  | 18.34900000  | 0.00000000 |
| 69 | 974.24630000  | 0.08280000   | 0.00000000 |
| 70 | 979.15810000  | 0.16560000   | 0.00000000 |
| 71 | 983.02680000  | 0.18330000   | 0.00000000 |
| 72 | 989.38960000  | 27.92600000  | 0.00000000 |
| 73 | 995.54450000  | 0.11750000   | 0.00000000 |
| 74 | 998.06270000  | 1.42660000   | 0.00000000 |
| 75 | 1015.61300000 | 76.43530000  | 0.00000000 |
| 76 | 1021.17820000 | 3.22380000   | 0.00000000 |
| 77 | 1025.60490000 | 0.32160000   | 0.00000000 |
| 78 | 1025.89910000 | 2.34370000   | 0.00000000 |
| 79 | 1049.12460000 | 9.46740000   | 0.00000000 |
| 80 | 1053.24290000 | 26.45070000  | 0.00000000 |
| 81 | 1053.85520000 | 3.59210000   | 0.00000000 |
| 82 | 1054.25290000 | 5.41590000   | 0.00000000 |
| 83 | 1066.15600000 | 9.36280000   | 0.00000000 |
| 84 | 1091.25400000 | 39.99660000  | 0.00000000 |
| 85 | 1100.71810000 | 28.42800000  | 0.00000000 |
| 86 | 1105.39520000 | 7.05500000   | 0.00000000 |
| 87 | 1118.41050000 | 102.37080000 | 0.00000000 |
| 88 | 1121.76080000 | 20.26880000  | 0.00000000 |
| 89 | 1133.07940000 | 57.04820000  | 0.00000000 |
| 90 | 1139.89270000 | 171.00220000 | 0.00000000 |
| 91 | 1161.44820000 | 23.03590000  | 0.00000000 |
| 92 | 1169.06460000 | 545.99740000 | 0.00000000 |
| 93 | 1180.06710000 | 0.55760000   | 0.00000000 |
| 94 | 1180.58260000 | 0.22740000   | 0.00000000 |
| 95 | 1201.21410000 | 1.07180000   | 0.00000000 |

|     |               |              |            |
|-----|---------------|--------------|------------|
| 96  | 1203.20150000 | 113.55870000 | 0.00000000 |
| 97  | 1206.17880000 | 10.01460000  | 0.00000000 |
| 98  | 1224.51690000 | 6.03610000   | 0.00000000 |
| 99  | 1231.27710000 | 8.26200000   | 0.00000000 |
| 100 | 1245.54420000 | 135.58140000 | 0.00000000 |
| 101 | 1255.82050000 | 119.00620000 | 0.00000000 |
| 102 | 1272.18120000 | 23.91900000  | 0.00000000 |
| 103 | 1278.29970000 | 50.86580000  | 0.00000000 |
| 104 | 1284.12920000 | 46.25320000  | 0.00000000 |
| 105 | 1288.24790000 | 26.20900000  | 0.00000000 |
| 106 | 1324.60850000 | 43.51860000  | 0.00000000 |
| 107 | 1329.99720000 | 5.26070000   | 0.00000000 |
| 108 | 1332.17330000 | 17.91550000  | 0.00000000 |
| 109 | 1350.68750000 | 2.00670000   | 0.00000000 |
| 110 | 1358.61250000 | 1.03760000   | 0.00000000 |
| 111 | 1363.28750000 | 7.88170000   | 0.00000000 |
| 112 | 1384.26310000 | 12.75430000  | 0.00000000 |
| 113 | 1395.42090000 | 22.19640000  | 0.00000000 |
| 114 | 1395.88550000 | 13.55160000  | 0.00000000 |
| 115 | 1399.90850000 | 26.84260000  | 0.00000000 |
| 116 | 1402.24110000 | 26.06370000  | 0.00000000 |
| 117 | 1408.79110000 | 6.47850000   | 0.00000000 |
| 118 | 1412.97880000 | 8.91430000   | 0.00000000 |
| 119 | 1425.75500000 | 19.77430000  | 0.00000000 |
| 120 | 1426.71680000 | 0.63370000   | 0.00000000 |
| 121 | 1467.84030000 | 0.33170000   | 0.00000000 |
| 122 | 1479.57570000 | 13.05100000  | 0.00000000 |
| 123 | 1483.65710000 | 0.04660000   | 0.00000000 |
| 124 | 1483.92650000 | 2.49240000   | 0.00000000 |
| 125 | 1484.09050000 | 1.31260000   | 0.00000000 |
| 126 | 1488.32420000 | 2.16690000   | 0.00000000 |
| 127 | 1489.69740000 | 17.02840000  | 0.00000000 |
| 128 | 1490.91250000 | 17.13560000  | 0.00000000 |
| 129 | 1492.56680000 | 0.46140000   | 0.00000000 |
| 130 | 1495.21770000 | 7.33860000   | 0.00000000 |
| 131 | 1497.31460000 | 2.87600000   | 0.00000000 |
| 132 | 1501.25150000 | 0.98890000   | 0.00000000 |
| 133 | 1507.12070000 | 16.80120000  | 0.00000000 |
| 134 | 1509.23780000 | 4.00580000   | 0.00000000 |
| 135 | 1516.35260000 | 22.96790000  | 0.00000000 |
| 136 | 1531.35220000 | 22.79050000  | 0.00000000 |
| 137 | 1533.43960000 | 10.82070000  | 0.00000000 |
| 138 | 1624.20660000 | 0.73730000   | 0.00000000 |

|     |               |              |            |
|-----|---------------|--------------|------------|
| 139 | 1628.31760000 | 0.81720000   | 0.00000000 |
| 140 | 1644.31780000 | 10.08960000  | 0.00000000 |
| 141 | 1648.42530000 | 1.95740000   | 0.00000000 |
| 142 | 1761.59340000 | 517.21880000 | 0.00000000 |
| 143 | 2943.37760000 | 45.18490000  | 0.00000000 |
| 144 | 2948.11190000 | 108.34100000 | 0.00000000 |
| 145 | 2971.90180000 | 75.06930000  | 0.00000000 |
| 146 | 2998.84330000 | 78.34400000  | 0.00000000 |
| 147 | 3042.80700000 | 26.78270000  | 0.00000000 |
| 148 | 3042.87770000 | 16.13940000  | 0.00000000 |
| 149 | 3045.91450000 | 34.03690000  | 0.00000000 |
| 150 | 3049.23970000 | 25.61490000  | 0.00000000 |
| 151 | 3052.25120000 | 17.78820000  | 0.00000000 |
| 152 | 3081.67930000 | 39.90120000  | 0.00000000 |
| 153 | 3097.82850000 | 30.64430000  | 0.00000000 |
| 154 | 3105.42840000 | 10.37490000  | 0.00000000 |
| 155 | 3106.33470000 | 3.44170000   | 0.00000000 |
| 156 | 3108.14470000 | 16.18900000  | 0.00000000 |
| 157 | 3110.45970000 | 75.26220000  | 0.00000000 |
| 158 | 3112.58030000 | 45.49140000  | 0.00000000 |
| 159 | 3115.76810000 | 33.84810000  | 0.00000000 |
| 160 | 3117.28400000 | 40.21320000  | 0.00000000 |
| 161 | 3118.52070000 | 58.81570000  | 0.00000000 |
| 162 | 3125.54640000 | 33.03920000  | 0.00000000 |
| 163 | 3143.48370000 | 0.81860000   | 0.00000000 |
| 164 | 3146.44470000 | 24.07820000  | 0.00000000 |
| 165 | 3165.34170000 | 6.10330000   | 0.00000000 |
| 166 | 3166.60320000 | 0.81740000   | 0.00000000 |
| 167 | 3172.41250000 | 1.27230000   | 0.00000000 |
| 168 | 3174.87620000 | 17.50800000  | 0.00000000 |
| 169 | 3181.73120000 | 29.41800000  | 0.00000000 |
| 170 | 3189.11970000 | 35.65790000  | 0.00000000 |
| 171 | 3192.10640000 | 34.49390000  | 0.00000000 |
| 172 | 3199.04410000 | 16.28490000  | 0.00000000 |
| 173 | 3199.36850000 | 8.33040000   | 0.00000000 |
| 174 | 3205.87020000 | 12.46970000  | 0.00000000 |

## Thermochemistry Values

Left Rotamer Axial:

|                               | Temperature                                  |                                              |
|-------------------------------|----------------------------------------------|----------------------------------------------|
|                               | 298 K                                        | 195 K                                        |
| $\epsilon_0$                  | -1194.38643726 a.u.                          | -1194.38643726 a.u.                          |
| $\epsilon_{ZPE}$              | 0.519464 a.u.                                | 0.519464 a.u.                                |
| $E_{tot}$                     | 0.546344 a.u.                                | 0.531746 a.u.                                |
| $H_{corr}$                    | 0.547288 a.u.                                | 0.532363 a.u.                                |
| $G_{corr}$                    | 0.461281 a.u.                                | 0.487928 a.u.                                |
| $S_{tot}$                     | 181.016 calmol <sup>-1</sup> K <sup>-1</sup> | 142.994 calmol <sup>-1</sup> K <sup>-1</sup> |
| $\epsilon_0 + \epsilon_{ZPE}$ | -1193.866973 a.u.                            | -1193.866973 a.u.                            |
| $\epsilon_0 + E_{tot}$        | -1193.840094 a.u.                            | -1193.854691 a.u.                            |
| $\epsilon_0 + H_{corr}$       | -1193.839149 a.u.                            | -1193.854074 a.u.                            |
| $\epsilon_0 + G_{corr}$       | -1193.925156 a.u.                            | -1193.898509 a.u.                            |

Right Rotamer Axial:

|                               | Temperature                                  |                                              |
|-------------------------------|----------------------------------------------|----------------------------------------------|
|                               | 298 K                                        | 195 K                                        |
| $\epsilon_0$                  | -1194.38576012 a.u.                          | -1194.38576012 a.u.                          |
| $\epsilon_{ZPE}$              | 0.519236 a.u.                                | 0.519236 a.u.                                |
| $E_{tot}$                     | 0.546197 a.u.                                | 0.531585 a.u.                                |
| $H_{corr}$                    | 0.547141 a.u.                                | 0.532203 a.u.                                |
| $G_{corr}$                    | 0.460232 a.u.                                | 0.487188 a.u.                                |
| $S_{tot}$                     | 182.916 calmol <sup>-1</sup> K <sup>-1</sup> | 144.858 calmol <sup>-1</sup> K <sup>-1</sup> |
| $\epsilon_0 + \epsilon_{ZPE}$ | -1193.866525 a.u.                            | -1193.866524 a.u.                            |
| $\epsilon_0 + E_{tot}$        | -1193.839563 a.u.                            | -1193.854175 a.u.                            |
| $\epsilon_0 + H_{corr}$       | -1193.838619 a.u.                            | -1193.853557 a.u.                            |
| $\epsilon_0 + G_{corr}$       | -1193.925528 a.u.                            | -1193.898572 a.u.                            |

Left Rotamer Equatorial:

|                               | Temperature                                  |                                              |
|-------------------------------|----------------------------------------------|----------------------------------------------|
|                               | 298 K                                        | 195 K                                        |
| $\epsilon_0$                  | -1194.38233605 a.u.                          | -1194.38233605 a.u.                          |
| $\epsilon_{ZPE}$              | 0.518995 a.u.                                | 0.518995 a.u.                                |
| $E_{tot}$                     | 0.545961 a.u.                                | 0.531318 a.u.                                |
| $H_{corr}$                    | 0.546905 a.u.                                | 0.531935 a.u.                                |
| $G_{corr}$                    | 0.461409 a.u.                                | 0.487871 a.u.                                |
| $S_{tot}$                     | 179.943 calmol <sup>-1</sup> K <sup>-1</sup> | 141.800 calmol <sup>-1</sup> K <sup>-1</sup> |
| $\epsilon_0 + \epsilon_{ZPE}$ | -1193.863341 a.u.                            | -1193.863341 a.u.                            |
| $\epsilon_0 + E_{tot}$        | -1193.836375 a.u.                            | -1193.851018 a.u.                            |
| $\epsilon_0 + H_{corr}$       | -1193.835431 a.u.                            | -1193.850401 a.u.                            |
| $\epsilon_0 + G_{corr}$       | -1193.920928 a.u.                            | -1193.894465 a.u.                            |

Right Rotamer Equatorial:

|                               | Temperature                                  |                                              |
|-------------------------------|----------------------------------------------|----------------------------------------------|
|                               | 298 K                                        | 195 K                                        |
| $\epsilon_0$                  | -1194.37986331 a.u.                          | -1194.37986331 a.u.                          |
| $\epsilon_{ZPE}$              | 0.518668 a.u.                                | 0.518668 a.u.                                |
| $E_{tot}$                     | 0.545801 a.u.                                | 0.531135 a.u.                                |
| $H_{corr}$                    | 0.546745 a.u.                                | 0.531752 a.u.                                |
| $G_{corr}$                    | 0.45989 a.u.                                 | 0.486818 a.u.                                |
| $S_{tot}$                     | 182.801 calmol <sup>-1</sup> K <sup>-1</sup> | 144.598 calmol <sup>-1</sup> K <sup>-1</sup> |
| $\epsilon_0 + \epsilon_{ZPE}$ | -1193.861195 a.u.                            | -1193.861195 a.u.                            |
| $\epsilon_0 + E_{tot}$        | -1193.834063 a.u.                            | -1193.848728 a.u.                            |
| $\epsilon_0 + H_{corr}$       | -1193.833118 a.u.                            | -1193.848111 a.u.                            |
| $\epsilon_0 + G_{corr}$       | -1193.919973 a.u.                            | -1193.893045 a.u.                            |

Axial Clockwise Transition State:

|                               | Temperature                                  |                                              |
|-------------------------------|----------------------------------------------|----------------------------------------------|
|                               | 298 K                                        | 195 K                                        |
| $\epsilon_0$                  | -1194.35793774 a.u.                          | -1194.35793774 a.u.                          |
| $\epsilon_{ZPE}$              | 0.518653 a.u.                                | 0.518653 a.u.                                |
| $E_{tot}$                     | 0.544687 a.u.                                | 0.530395 a.u.                                |
| $H_{corr}$                    | 0.545632 a.u.                                | 0.531012 a.u.                                |
| $G_{corr}$                    | 0.462020 a.u.                                | 0.487897 a.u.                                |
| $S_{tot}$                     | 175.976 calmol <sup>-1</sup> K <sup>-1</sup> | 138.745 calmol <sup>-1</sup> K <sup>-1</sup> |
| $\epsilon_0 + \epsilon_{ZPE}$ | -1193.839285 a.u.                            | -1193.839285 a.u.                            |
| $\epsilon_0 + E_{tot}$        | -1193.813250 a.u.                            | -1193.827543 a.u.                            |
| $\epsilon_0 + H_{corr}$       | -1193.812306 a.u.                            | -1193.826926 a.u.                            |
| $\epsilon_0 + G_{corr}$       | -1193.895918 a.u.                            | -1193.870041 a.u.                            |

Axial Anticlockwise Transition State:

|                               | Temperature                                  |                                              |
|-------------------------------|----------------------------------------------|----------------------------------------------|
|                               | 298 K                                        | 195 K                                        |
| $\epsilon_0$                  | -1194.35848593 a.u.                          | -1194.35848593 a.u.                          |
| $\epsilon_{ZPE}$              | 0.518536 a.u.                                | 0.518536 a.u.                                |
| $E_{tot}$                     | 0.544693 a.u.                                | 0.530371 a.u.                                |
| $H_{corr}$                    | 0.545637 a.u.                                | 0.530989 a.u.                                |
| $G_{corr}$                    | 0.462165 a.u.                                | 0.487990 a.u.                                |
| $S_{tot}$                     | 175.682 calmol <sup>-1</sup> K <sup>-1</sup> | 138.371 calmol <sup>-1</sup> K <sup>-1</sup> |
| $\epsilon_0 + \epsilon_{ZPE}$ | -1193.839950 a.u.                            | -1193.839950 a.u.                            |
| $\epsilon_0 + E_{tot}$        | -1193.813793 a.u.                            | -1193.828115 a.u.                            |
| $\epsilon_0 + H_{corr}$       | -1193.812849 a.u.                            | -1193.827497 a.u.                            |
| $\epsilon_0 + G_{corr}$       | -1193.896321 a.u.                            | -1193.870496 a.u.                            |

Equatorial Clockwise Transition State:

|                               | Temperature                                  |                                              |
|-------------------------------|----------------------------------------------|----------------------------------------------|
|                               | 298 K                                        | 195 K                                        |
| $\epsilon_0$                  | -1194.36728384 a.u.                          | -1194.36728384 a.u.                          |
| $\epsilon_{ZPE}$              | 0.518307 a.u.                                | 0.518307 a.u.                                |
| $E_{tot}$                     | 0.544481 a.u.                                | 0.530153 a.u.                                |
| $H_{corr}$                    | 0.545426 a.u.                                | 0.530771 a.u.                                |
| $G_{corr}$                    | 0.462121 a.u.                                | 0.487887 a.u.                                |
| $S_{tot}$                     | 175.330 calmol <sup>-1</sup> K <sup>-1</sup> | 138.002 calmol <sup>-1</sup> K <sup>-1</sup> |
| $\epsilon_0 + \epsilon_{ZPE}$ | -1193.848977 a.u.                            | -1193.848977 a.u.                            |
| $\epsilon_0 + E_{tot}$        | -1193.822802 a.u.                            | -1193.837131 a.u.                            |
| $\epsilon_0 + H_{corr}$       | -1193.821858 a.u.                            | -1193.836513 a.u.                            |
| $\epsilon_0 + G_{corr}$       | -1193.905163 a.u.                            | -1193.879397 a.u.                            |

Equatorial Anticlockwise Transition State:

|                               | Temperature                                  |                                              |
|-------------------------------|----------------------------------------------|----------------------------------------------|
|                               | 298 K                                        | 195 K                                        |
| $\epsilon_0$                  | -1194.36566296 a.u.                          | -1194.36566296 a.u.                          |
| $\epsilon_{ZPE}$              | 0.518207 a.u.                                | 0.518207 a.u.                                |
| $E_{tot}$                     | 0.544419 a.u.                                | 0.530084 a.u.                                |
| $H_{corr}$                    | 0.545363 a.u.                                | 0.530702 a.u.                                |
| $G_{corr}$                    | 0.461668 a.u.                                | 0.487567 a.u.                                |
| $S_{tot}$                     | 176.151 calmol <sup>-1</sup> K <sup>-1</sup> | 138.806 calmol <sup>-1</sup> K <sup>-1</sup> |
| $\epsilon_0 + \epsilon_{ZPE}$ | -1193.847456 a.u.                            | -1193.847456 a.u.                            |
| $\epsilon_0 + E_{tot}$        | -1193.821244 a.u.                            | -1193.835579 a.u.                            |
| $\epsilon_0 + H_{corr}$       | -1193.820300 a.u.                            | -1193.834961 a.u.                            |
| $\epsilon_0 + G_{corr}$       | -1193.903995 a.u.                            | -1193.878096 a.u.                            |

## 7. References

1. Chak, B. C. M.; McAuley, A. *Can. J. Chem.* **2006**, *84*, 187–195.
2. Salituro, F. G.; Saunders, J. O.; Yan, S.; *WO 2012/092442 A1*
3. Firth, J. D.; O'Brien, P.; Ferris, L. *J. Org. Chem.* **2017**, *82*, 7023–7031.
4. O'Brien, C. J.; Nicewicz, D. A. *Synlett* **2021**, *32*, 814–816.
5. Shaw, M. H.; Shurtleff, V. W.; Terrett, J. A.; Cuthbertson, J. D.; MacMillan, D. W. C. *Science* **2016**, *352*, 1304–1308.
6. Zuo, Z.; Ahneman, D. T.; Chu, L.; Terrett, J. A.; Doyle, A. G.; MacMillan, D. W. C. *Science* **2014**, *345*, 437–440.
7. Yao, H.; Uras, G.; Zhang, P.; Shengtao, X.; Yin, Y.; Liu, J.; Qin, S.; Li, X.; Allen, S.; Bai, R.; Gong, Q.; Zhang, H.; Zhu, Z; Xu, J. *J. Med. Chem.* **2021**, *64*, 7483–7506.
8. For software, see iNMR (<http://www.inmr.net>).
9. Becke, A. D. *J. Chem. Phys.* **1993**, *98*, 5648–5652.
10. Frisch, M. J.; Trucks, G. W.; Schlegel, H. B.; Scuseria, G. E.; Robb, M. A.; Cheeseman, J. R.; Scalmani, G.; Barone, V.; Mennucci, B.; Petersson, G. A.; Nakatsuji, H.; Caricato, M.; Li, X.; Hratchian, H. P.; Izmaylov, A. F.; Bloino, J.; Zheng, G.; Sonnenberg, J. L.; Hada, M.; Ehara, M.; Toyota, K.; Fukuda, R.; Hasegawa, J.; Ishida, M.; Nakajima, T.; Honda, Y.; Kitao, O.; Nakai, H.; Vreven, T.; Montgomery, Jr., J. A.; Peralta, J. E.; Ogliaro, F.; Bearpark, M.; Heyd, J. J.; Brothers, E.; Kudin, K. N.; Staroverov, V. N.; Kobayashi, R.; Normand, J.; Raghavachari, K.; Rendell, A.; Burant, J. C.; Iyengar, S. S.; Tomasi, J.; Cossi, M.; Rega, N.; Millam, N. J.; Klene, M.; Knox, J. E.; Cross, J. B.; Bakken, V.; Adamo, C.; Jaramillo, J.; Gomperts, R.; Stratmann, R. E.; Yazyev, O.; Austin, A. J.; Cammi, R.; Pomelli, C.; Ochterski, J. W.; Martin, R. L.; Morokuma, K.; Zakrzewski, V. G.; Voth, G. A.; Salvador, P.; Dannenberg, J. J.; Dapprich, S.; Daniels, A. D.; Farkas, Ö.; Foresman, J. B.; Ortiz, J. V.; Cioslowski, J.; Fox, D. J. Gaussian, Inc., Wallingford CT, **2009**.
11. Grimme, S.; Ehrlich, S.; Goerigk, L. *J. Comput. Chem.* **2011**, *32*, 1456–1465.
12. Weigend, F.; Ahlrichs R. *Phys. Chem. Chem. Phys.* **2005**, *7*, 3297–3305.
13. Scalmani, G.; Frisch, M. J. *J. Chem. Phys.* **2010**, *132*, 114110.
14. Cossi, M.; Rega, N.; Scalmani, G.; Barone, V. *J. Comput. Chem.* **2003**, *24*, 669–681.
